# Supplementary material
Source: Royal Society of Chemistry journal article supplement (doi:10.1039/d6py00246c)
Supplement: d6py00246c1.pdf [file d6py00246c1.pdf]

## Supplementary Information

### AIE/CPL Dual-Functional Poly(aryl isocyanide)s Synthesized by (*S,S*)-Bis(oxazolinyphenyl)amido-Ligated Palladium Phenylethynyl Complexes: High-Security Anti-Counterfeiting and Targeted Cellular Imaging

Beiming Yu,<sup>a</sup> Shuling Jia,<sup>a</sup> Xuanren Zhu,<sup>a</sup> Jiaojiao Li,<sup>a</sup> Changguo Sun,<sup>a</sup> Chao Ma,<sup>a</sup> Shuangshuang Ma,<sup>a</sup> Minjian Wu,<sup>a</sup> Zhiyuan Hu,<sup>a</sup> Xiaolu Wu,<sup>\*b</sup> Guangpeng Gao,<sup>\*a</sup> and Xiaofang Li<sup>\*a</sup>

<sup>a</sup>Key Laboratory of Cluster Science of Ministry of Education, Beijing Key Laboratory of Photoelectronic/Electrophotonic Conversion Materials, School of Chemistry and Chemical Engineering, Beijing Institute of Technology, 5 South Zhongguancun Street, Haidian District, Beijing 100081, China.

<sup>b</sup>Department of Chemistry, School of Science, Tianjin Chengjian University, Tianjin 300384, PR China.

#### Table of contents

|                                                                                                                                                                                                                                            |           |
|--------------------------------------------------------------------------------------------------------------------------------------------------------------------------------------------------------------------------------------------|-----------|
| <b>EXPERIMENTAL SECTION</b> .....                                                                                                                                                                                                          | <b>1</b>  |
| <b>Scheme S1.</b> Synthesis of bis(oxazolinyphenyl)amido palladium complexes <b>1a-d</b> .....                                                                                                                                             | <b>2</b>  |
| <b>Figure S1.</b> <sup>1</sup> H NMR spectrum of [Ph <sub>2</sub> -( <i>S,S</i> )-BOZ]PdC≡CC <sub>6</sub> H <sub>5</sub> ( <b>1a</b> ) .....                                                                                               | <b>3</b>  |
| <b>Figure S2.</b> <sup>13</sup> C NMR spectrum of [Ph <sub>2</sub> -( <i>S,S</i> )-BOZ]PdC≡CC <sub>6</sub> H <sub>5</sub> ( <b>1a</b> ) .....                                                                                              | <b>4</b>  |
| <b>Figure S3.</b> <sup>1</sup> H NMR spectrum of [Pr <sub>2</sub> -( <i>S,S</i> )-BOZ]PdC≡CC <sub>6</sub> H <sub>5</sub> ( <b>1b</b> ) .....                                                                                               | <b>4</b>  |
| <b>Figure S4.</b> <sup>13</sup> C NMR spectrum of [Pr <sub>2</sub> -( <i>S,S</i> )-BOZ]PdC≡CC <sub>6</sub> H <sub>5</sub> ( <b>1b</b> ) .....                                                                                              | <b>5</b>  |
| <b>Figure S5.</b> <sup>1</sup> H NMR spectrum of [Bn <sub>2</sub> -( <i>S,S</i> )-BOZ]PdC≡CC <sub>6</sub> H <sub>5</sub> ( <b>1c</b> ) .....                                                                                               | <b>5</b>  |
| <b>Figure S6.</b> <sup>13</sup> C NMR spectrum of [Bn <sub>2</sub> -( <i>S,S</i> )-BOZ]PdC≡CC <sub>6</sub> H <sub>5</sub> ( <b>1c</b> ) .....                                                                                              | <b>6</b>  |
| <b>Figure S7.</b> <sup>1</sup> H NMR spectrum of [Et <sub>2</sub> -( <i>S,S</i> )-BOZ]PdC≡CC <sub>6</sub> H <sub>5</sub> ( <b>1d</b> ) .....                                                                                               | <b>6</b>  |
| <b>Figure S8.</b> <sup>13</sup> C NMR spectrum of [Et <sub>2</sub> -( <i>S,S</i> )-BOZ]PdC≡CC <sub>6</sub> H <sub>5</sub> ( <b>1d</b> ) .....                                                                                              | <b>7</b>  |
| <b>Scheme S2.</b> Synthesis of 4-ethoxycarbonyl phenyl isocyanide ( <b>EPI</b> ) .....                                                                                                                                                     | <b>7</b>  |
| <b>Scheme S3.</b> Synthesis of 2-naphthyl Isocyanide ( <b>NI</b> ) .....                                                                                                                                                                   | <b>8</b>  |
| <b>Scheme S4.</b> 4-isocyano-4'-(1,2,2-triphenylvinyl)-1,1'-biphenyl ( <b>ITPB</b> ) .....                                                                                                                                                 | <b>9</b>  |
| <b>Scheme S5.</b> Synthesis of ( <i>1S,2R,5S</i> )-2-isopropyl-5-methylcyclohexyl 4-isocyanobenzoate ( <b>D-IMCI</b> ) and ( <i>1R,2S,5R</i> )-2-isopropyl-5-methylcyclohexyl 4-isocyanobenzoate ( <b>L-IMCI</b> ) .....                   | <b>10</b> |
| <b>Scheme S6.</b> Synthesis of diisopropyl 5-isocyanoisophthalate ( <b>DIPI</b> ) .....                                                                                                                                                    | <b>12</b> |
| <b>Figure S9.</b> <sup>1</sup> H NMR spectrum of diisopropyl 5-aminoisophthalate ( <b>2</b> ) .....                                                                                                                                        | <b>13</b> |
| <b>Figure S10.</b> <sup>1</sup> H NMR spectrum of diisopropyl 5-isocyanoisophthalate ( <b>2g</b> ) .....                                                                                                                                   | <b>13</b> |
| <b>Figure S11.</b> <sup>13</sup> C NMR spectrum of diisopropyl 5-isocyanoisophthalate ( <b>2g</b> ) .....                                                                                                                                  | <b>14</b> |
| <b>Scheme S7.</b> Synthesis of 4-(( <i>2R</i> )-2-alanine-3-(2-methoxyethyl) carbonyl phenyl isocyanide( <b>D-OEGI</b> ) and 4-(( <i>2S</i> )-2-alanine-3-(2-methoxyethyl) carbonyl phenyl isocyanide ( <b>L-OEGI</b> ) .....              | <b>14</b> |
| <b>A typical procedure for the polymerization of 2a (EPI) by neutral chiral (<i>S,S</i>)-bis(oxazoline) palladium complexes 1a/PPh<sub>3</sub> (Table 1, entry 1):</b> .....                                                               | <b>15</b> |
| <b>A typical procedure for the polymerization of 2a (EPI) by neutral chiral (<i>S,S</i>)-bis(oxazoline) palladium complexes 1a (Table 1, entry 5):</b> .....                                                                               | <b>15</b> |
| <b>A typical procedure for the copolymerization of (<i>1S,2R,5S</i>)-2-isopropyl-5-methylcyclohexyl 4-isocyanobenzoate (<b>D-IMCI</b>) with 4-isocyano-4'-(1,2,2-triphenylvinyl)-1,1'-biphenyl (<b>ITPB</b>) (Table 3, entry 3):</b> ..... | <b>15</b> |

|                                                                                                                                                                                                                                                                                |           |
|--------------------------------------------------------------------------------------------------------------------------------------------------------------------------------------------------------------------------------------------------------------------------------|-----------|
| <b>A typical procedure for the copolymerization of (1<i>S</i>,2<i>R</i>,5<i>S</i>)-2-isopropyl-5-methylcyclohexyl 4-isocyanobenzoate (D-IMCI) with isopropyl 3-isocyanobenzoate (IPI) (Table 4, entry 3):</b>                                                                  | <b>16</b> |
| <b>Figure S12.</b> <sup>1</sup> H NMR spectrum of polymers (a) poly(IPI) (Table 2, entry 23), (b) poly(EPI) (Table 2, entry 13), (c) poly(D-IMCI) (Table 2, entry 21), (d) poly(L-IMCI) (Table 2, entry 22), (e) poly(ITPB) (Table 1, entry 18) in CDCl <sub>3</sub> at 25 °C. | <b>17</b> |
| <b>Figure S13.</b> FT-IR spectra of polymers (A) EPI and poly(EPI), (B) ITPB and poly(ITPB), (C) poly(IPI), (D) poly(D-IMCI) and (E) poly(L-IMCI).                                                                                                                             | <b>18</b> |
| <b>Figure S14.</b> GPC curve of polyEPI obtained by complex <b>1a</b> in Table 1, entry 1.                                                                                                                                                                                     | <b>18</b> |
| <b>Figure S15.</b> GPC curve of polyEPI obtained by complex <b>1b</b> in Table 1, entry 2.                                                                                                                                                                                     | <b>19</b> |
| <b>Figure S16.</b> GPC curve of polyEPI obtained by complex <b>1c</b> in Table 1, entry 3.                                                                                                                                                                                     | <b>19</b> |
| <b>Figure S17.</b> GPC curve of polyEPI obtained by complex <b>1d</b> in Table 1, entry 4.                                                                                                                                                                                     | <b>20</b> |
| <b>Figure S18.</b> GPC curve of polyEPI obtained by complex <b>1a</b> /PPh <sub>3</sub> in Table 1, entry 5.                                                                                                                                                                   | <b>20</b> |
| <b>Figure S19.</b> GPC curve of polyEPI obtained by complex <b>1b</b> /PPh <sub>3</sub> in Table 1, entry 6.                                                                                                                                                                   | <b>21</b> |
| <b>Figure S20.</b> GPC curve of polyEPI obtained by complex <b>1c</b> /PPh <sub>3</sub> in Table 1, entry 7.                                                                                                                                                                   | <b>21</b> |
| <b>Figure S21.</b> GPC curve of polyEPI obtained by complex <b>1c</b> /PPh <sub>3</sub> in Table 1, entry 8.                                                                                                                                                                   | <b>22</b> |
| <b>Figure S22.</b> GPC curve of polyEPI obtained by complex <b>1d</b> /PPh <sub>3</sub> in Table 1, entry 9.                                                                                                                                                                   | <b>22</b> |
| <b>Figure S23.</b> GPC curve of polyEPI obtained by complex <b>1d</b> /PPh <sub>3</sub> in Table 1, entry 10.                                                                                                                                                                  | <b>23</b> |
| <b>Figure S24.</b> GPC curve of polyEPI obtained by complex <b>1d</b> /PPh <sub>3</sub> in Table 1, entry 13.                                                                                                                                                                  | <b>23</b> |
| <b>Figure S25.</b> GPC curve of polyEPI obtained by complex <b>1d</b> /PPh <sub>3</sub> in Table 1, entry 14.                                                                                                                                                                  | <b>24</b> |
| <b>Figure S26.</b> GPC curve of polyEPI obtained by complex <b>1d</b> /PPh <sub>3</sub> in Table 1, entry 15.                                                                                                                                                                  | <b>24</b> |
| <b>Figure S27.</b> GPC curve of polyEPI obtained by complex <b>1d</b> /PPh <sub>3</sub> in Table 1, entry 17.                                                                                                                                                                  | <b>25</b> |
| <b>Figure S28.</b> GPC curve of polyEPI obtained by complex <b>1d</b> /PPh <sub>3</sub> in Table 1, entry 18.                                                                                                                                                                  | <b>25</b> |
| <b>Figure S29.</b> GPC curve of polyEPI obtained by complex <b>1d</b> /PPh <sub>3</sub> in Table 1, entry 19.                                                                                                                                                                  | <b>26</b> |
| <b>Figure S30.</b> GPC curve of polyEPI obtained by complex <b>1d</b> /PPh <sub>3</sub> in Table 1, entry 20.                                                                                                                                                                  | <b>26</b> |
| <b>Figure S31.</b> GPC curve of polyEPI obtained by complex <b>1d</b> /PEt <sub>3</sub> in Table 1, entry 22.                                                                                                                                                                  | <b>27</b> |
| <b>Figure S32.</b> GPC curve of polyEPI obtained by complex <b>1d</b> /P( <i>n</i> -Bu) <sub>3</sub> in Table 1, entry 23.                                                                                                                                                     | <b>27</b> |
| <b>Figure S33.</b> GPC curve of polyEPI obtained by complex <b>1d</b> /P( <i>n</i> -Oct) <sub>3</sub> in Table 1, entry 24.                                                                                                                                                    | <b>28</b> |
| <b>Figure S34.</b> GPC curve of polyEPI obtained by complex <b>1d</b> /P(C <sub>6</sub> H <sub>11</sub> ) <sub>3</sub> in Table 1, entry 25.                                                                                                                                   | <b>28</b> |
| <b>Figure S35.</b> GPC curve of polyNI obtained by complex <b>1d</b> /PPh <sub>3</sub> in Table 1, entry 26.                                                                                                                                                                   | <b>29</b> |
| <b>Figure S36.</b> GPC curve of polyITPB obtained by complex <b>1d</b> /PPh <sub>3</sub> in Table 1, entry 27.                                                                                                                                                                 | <b>29</b> |
| <b>Figure S37.</b> GPC curve of poly(D-IMCI) obtained by complex <b>1d</b> /PPh <sub>3</sub> in Table 1, entry 28.                                                                                                                                                             | <b>30</b> |
| <b>Figure S38.</b> GPC curve of poly(L-IMCI) obtained by complex <b>1d</b> /PPh <sub>3</sub> in Table 1, entry 29.                                                                                                                                                             | <b>30</b> |
| <b>Figure S39.</b> GPC curve of polyIPI obtained by complex <b>1d</b> /PPh <sub>3</sub> in Table 1, entry 30.                                                                                                                                                                  | <b>31</b> |
| <b>Figure S40.</b> GPC curve of poly(D-OEGI) obtained by complex <b>1d</b> /PPh <sub>3</sub> in Table 1, entry 32.                                                                                                                                                             | <b>31</b> |
| <b>Figure S41.</b> GPC curve of poly(L-OEGI) obtained by complex <b>1d</b> /PPh <sub>3</sub> in Table 1, entry 33.                                                                                                                                                             | <b>32</b> |
| <b>Figure S42.</b> GPC curve of polyEPI obtained by complex <b>1d</b> in Table 1, entry 34.                                                                                                                                                                                    | <b>32</b> |
| <b>Figure S43.</b> GPC curve of polyEPI obtained by complex <b>1d</b> in Table 1, entry 35.                                                                                                                                                                                    | <b>33</b> |
| <b>Figure S44.</b> GPC curve of polyIPTB obtained by complex <b>1d</b> in Table 1, entry 36.                                                                                                                                                                                   | <b>33</b> |
| <b>Figure S45.</b> GPC curve of polyIPTB obtained by complex <b>1d</b> in Table 1, entry 37.                                                                                                                                                                                   | <b>34</b> |
| <b>Figure S46.</b> GPC curve of polyITPB obtained by complex <b>1d</b> in Table 1, entry 38.                                                                                                                                                                                   | <b>34</b> |
| <b>Figure S47.</b> GPC curve of polyIPI obtained by complex <b>1d</b> in Table 1, entry 39.                                                                                                                                                                                    | <b>35</b> |
| <b>Figure S48.</b> GPC curve of polyIPI obtained by complex <b>1d</b> in Table 1, entry 40.                                                                                                                                                                                    | <b>35</b> |
| <b>Figure S49.</b> GPC curve of polyIPI obtained by complex <b>1d</b> in Table 1, entry 41.                                                                                                                                                                                    | <b>36</b> |
| <b>Figure S50.</b> (A) CD spectra of poly(EPI), poly(ITPB), and poly(IPI) obtained by complex <b>1d</b> in THF                                                                                                                                                                 |           |

(c = 0.2 mg mL<sup>-1</sup>) at 25 °C. (B) PL spectra of poly(ITPB) obtained by complex **1d** in the different concentration ratios of MeOH/THF (c = 0.5 mg mL<sup>-1</sup>, under 365 nm UV irradiation). (C) CPL spectra of poly(ITPB) obtained by complex **1d** in THF (c = 0.2 mg mL<sup>-1</sup>).....36

**Figure S51.** <sup>1</sup>H NMR spectra of poly(D-IMCI-co-IPI)s (Table 2, entries 1-5).....37

**Figure S52.** <sup>1</sup>H NMR spectra of poly(L-IMCI-co-IPI)s (Table 2, entries 6-10).....37

**Figure S53.** <sup>1</sup>H NMR spectra of poly(D-IMCI-co-ITPB)s (Table 2, entries 11-15).....38

**Figure S54.** <sup>1</sup>H NMR spectra of poly(L-IMCI-co-ITPB)s (Table 2, entries 16-20) .....38

**Figure S55.** GPC curve of poly(D-IMCI-co-IPI) obtained by complex **1d**/PPh<sub>3</sub> in Table 2, entry 1. ....39

**Figure S56.** GPC curve of poly(D-IMCI-co-IPI) obtained by complex **1d**/PPh<sub>3</sub> in Table 2, entry 2. ....39

**Figure S57.** GPC curve of poly(D-IMCI-co-IPI) obtained by complex **1d**/PPh<sub>3</sub> in Table 2, entry 3. ....40

**Figure S58.** GPC curve of poly(D-IMCI-co-IPI) obtained by complex **1d**/PPh<sub>3</sub> in Table 2, entry 4. ....40

**Figure S59.** GPC curve of poly(D-IMCI-co-IPI) obtained by complex **1d**/PPh<sub>3</sub> in Table 2, entry 5. ....41

**Figure S60.** GPC curve of poly(L-IMCI-co-IPI) obtained by complex **1d**/PPh<sub>3</sub> in Table 2, entry 6. ....41

**Figure S61.** GPC curve of poly(L-IMCI-co-IPI) obtained by complex **1d**/PPh<sub>3</sub> in Table 2, entry 7. ....42

**Figure S62.** GPC curve of poly(L-IMCI-co-IPI) obtained by complex **1d**/PPh<sub>3</sub> in Table 2, entry 8. ....42

**Figure S63.** GPC curve of poly(L-IMCI-co-IPI) obtained by complex **1d**/PPh<sub>3</sub> in Table 2, entry 9. ....43

**Figure S64.** GPC curve of poly(L-IMCI-co-IPI) obtained by complex **1d**/PPh<sub>3</sub> in Table 2, entry 10. ....43

**Figure S65.** GPC curve of poly(D-IMCI-co-ITPB) obtained by complex **1d**/PPh<sub>3</sub> in Table 2, entry 11. ....44

**Figure S66.** GPC curve of poly(D-IMCI-co-ITPB) obtained by complex **1d**/PPh<sub>3</sub> in Table 2, entry 12. ....44

**Figure S67.** GPC curve of poly(D-IMCI-co-ITPB) obtained by complex **1d**/PPh<sub>3</sub> in Table 2, entry 13. ....45

**Figure S68.** GPC curve of poly(D-IMCI-co-ITPB) obtained by complex **1d**/PPh<sub>3</sub> in Table 2, entry 14. ....45

**Figure S69.** GPC curve of poly(D-IMCI-co-ITPB) obtained by complex **1d**/PPh<sub>3</sub> in Table 2, entry 15. ....46

**Figure S70.** GPC curve of poly(L-IMCI-co-ITPB) obtained by complex **1d**/PPh<sub>3</sub> in Table 2, entry 16. ....46

**Figure S71.** GPC curve of poly(L-IMCI-co-ITPB) obtained by complex **1d**/PPh<sub>3</sub> in Table 2, entry 17. ....47

**Figure S72.** GPC curve of poly(L-IMCI-co-ITPB) obtained by complex **1d**/PPh<sub>3</sub> in Table 2, entry 18. ....47

**Figure S73.** GPC curve of poly(L-IMCI-co-ITPB) obtained by complex **1b**/PPh<sub>3</sub> in Table 2, entry 19. ....48

**Figure S74.** GPC curve of poly(L-IMCI-co-ITPB) obtained by complex **1b**/PPh<sub>3</sub> in Table 2, entry 20. ....48

**Calculation of the IMCI contents of the copolymers** .....49

**Figure S75.** Experimental data of competitive aggregation rate between chiral isonitrile D-IMCI and non-chiral isonitrile IPI. ....50

**Figure S76.** Experimental data of competitive aggregation rate between chiral isonitrile D-IMCI and non-chiral isonitrile ITPB. ....50

**Figure S77.** AIE nature characterization of ITPB monomer in THF/water mixture. (A) Plots of fluorescence intensity vs MeOH fraction in THF/MeOH mixture (0.01 mol of ITPB unit/mL, EX wavelength: 321 nm, EX slit: 5 nm, EM slit: 5 nm, 700 V). (B) The UV absorption spectra with the MeOH fraction in THF/MeOH mixture ranging from 0 to 90%. (C) The UV/Vis transmittance spectra with the MeOH fraction in THF/MeOH mixture ranging from 0 to 90%. ....51

**Figure S78.** AIE nature characterization of (A) poly(D-IMCI-co-ITPB) (Table 2, entry 11), (B) poly(D-IMCI-co-ITPB) (Table 2, entry 12), (C) poly(D-IMCI-co-ITPB) (Table 2, entry 13), (D) poly(D-IMCI-co-ITPB) (Table 2, entry 14), (E) poly(D-IMCI-co-ITPB) (Table 2, entry 15), (F) poly(L-IMCI-co-ITPB) (Table 2, entry 16), (G) poly(L-IMCI-co-ITPB) (Table 2, entry 18), (H) poly(L-IMCI-co-ITPB) (Table 2, entry 19), (I) poly(L-IMCI-co-ITPB) (Table 2, entry 20) in THF/MeOH mixture. ....51

**Figure S79.** AIE nature characterization of (A) poly(D-IMCI-co-ITPB) (Table 2, entry 11), (B)

poly(D-IMCI-*co*-ITPB) (Table 2, entry 12), (C) poly(D-IMCI-*co*-ITPB) (Table 2, entry 13), (D) poly(D-IMCI-*co*-ITPB) (Table 2, entry 14), (E) poly(D-IMCI-*co*-ITPB) (Table 2, entry 15), (F) poly(L-IMCI-*co*-ITPB) (Table 2, entry 16), (G) poly(L-IMCI-*co*-ITPB) (Table 2, entry 18), (H) poly(L-IMCI-*co*-ITPB) (Table 2, entry 19), (I) poly(L-IMCI-*co*-ITPB) (Table 2, entry 20) in THF/MeOH mixture. ....52

**Figure S80.** AIE nature characterization of poly(D-IMCI-*co*-ITPB)s in THF/MeOH mixture. (A) Dynamic light scattering measurement of poly(D-IMCI-*co*-ITPB) (Table 2, entry 11) at 0% water fraction in THF-MeOH mixture (left side) and at 60% water fraction in THF-MeOH mixture (right side). (B) Dynamic light scattering measurement of poly(D-IMCI-*co*-ITPB) (Table 2, entry 12) at 0% water fraction in THF-water mixture (left side) and at 60% MeOH fraction in THF-MeOH mixture (right side). (C) Dynamic light scattering measurement of poly(D-IMCI-*co*-ITPB) (Table 2, entry 13) at 0% MeOH fraction in THF-MeOH mixture (left side) and at 50% MeOH fraction in THF-MeOH mixture (right side). (D) Dynamic light scattering measurement of poly(D-IMCI-*co*-ITPB) (Table 2, entry 14) at 0% MeOH fraction in THF-MeOH mixture (left side) and at 60% MeOH fraction in THF-MeOH mixture (right side). (E) Dynamic light scattering measurement of poly(D-IMCI-*co*-ITPB) (Table 2, entry 15) at 0% MeOH fraction in THF-MeOH mixture (left side) and at 60% water fraction in THF-MeOH mixture (right side). ....53

**Figure S81.** AIE nature characterization of poly(L-IMCI-*co*-ITPB)s in THF/MeOH mixture. (A) Dynamic light scattering measurement of poly(L-IMCI-*co*-ITPB) (Table 2, entry 16) at 0% water fraction in THF-water mixture (left side) and at 60% MeOH fraction in THF-MeOH mixture (right side). (B) Dynamic light scattering measurement of poly(L-IMCI-*co*-ITPB) (Table 2, entry 17) at 0% MeOH fraction in THF-water mixture (left side) and at 60% MeOH fraction in THF-MeOH mixture (right side). (C) Dynamic light scattering measurement of poly(L-IMCI-*co*-ITPB) (Table 2, entry 18) at 0% water fraction in THF-MeOH mixture (left side) and at 60% MeOH fraction in THF-MeOH mixture (right side). (D) Dynamic light scattering measurement of poly(L-IMCI-*co*-ITPB) (Table 2, entry 19) at 0% MeOH fraction in THF-MeOH mixture (left side) and at 60% MeOH fraction in THF-MeOH mixture (right side). (E) Dynamic light scattering measurement of poly(L-IMCI-*co*-ITPB) (Table 2, entry 20) at 0% MeOH fraction in THF-MeOH mixture (left side) and at 60% MeOH fraction in THF-MeOH mixture (right side). ....54

**References** .....55

## EXPERIMENTAL SECTION

### Materials.

All manipulations of air and moisture-sensitive compounds were performed under a dry and oxygen-free nitrogen atmosphere by using Schlenk techniques or under a nitrogen atmosphere in an Mbraun glove box. Nitrogen (Beijing AP Beifen Gases Industrial Co., Ltd.) was purified by passing through a Dryclean column (4A molecular sieves, Dalian Replete Science And Technology Co., Ltd.) and a Gasclean column (Dalian Replete Science And Technology Co., Ltd.). The nitrogen in the glovebox was constantly circulated through a copper/molecular sieves catalyst unit. The oxygen and moisture concentrations in the glovebox atmosphere were monitored by an O<sub>2</sub>/H<sub>2</sub>O Combi-Analyzer (Mbraun) to ensure both were always below 0.1 ppm. Anhydrous THF, hexane and toluene were purified by a solvent purification system (SPS-800, Mbraun), and dried over fresh Na chips in the glovebox. The isocyanide monomers were synthesized according to the literatures.<sup>1</sup> The deuterated solvents benzene-d<sub>6</sub> (99.6 atom% D), chloroform-d<sub>1</sub> (99.8 atom% D) and 1,1,2,2,-tetrachloroethane-d<sub>2</sub> (99.6 atom% D) were obtained from Cambridge Isotope .

### General Methods.

<sup>1</sup>H and <sup>13</sup>C NMR spectra were recorded on a Bruker Avance (III HD 400 MHz) spectrometer. The molecular weights and the molecular weight distributions of the EPI polymers were determined against polystyrene standard at 25 °C by GPC on a Waters HPLC-515 apparatus, CHCl<sub>3</sub> was employed as the eluent at a flow rate of 1 mL/min. The molecular weights and the molecular weight distributions of the D-(or L-)IMCI-ITPB copolymers were determined against polystyrene standard at 25 °C by GPC on a Waters HLC-8320GPC apparatus, THF was used as the eluent at a flow rate of 1 mL/min. FT-IR spectra were recorded on a Thermo IS5 FT-IR system using KBr pellets at room temperature. The UV-Vis spectra were recorded on a TU-1901 double beam UV-vis spectrophotometer, and the fluorescence spectra were recorded on a HITACHI F-7000 fluorescence spectrophotometer. Quartz cells with 10.0 mm length were used in UV-Vis and fluorescence measurement, and the slit widths were set at 5.0 nm for both excitation and emission during the fluorescence measurement. Circular dichroism spectra were collected on a Jasco J-810 and the quartz cell length is 1.0 mm. The circularly polarized luminescence (CPL) spectra were performed on JASCO CPL-300 spectrometer at room temperature using a 1.0 cm quartz cuvette. Atomic force microscope (AFM) was performed on a Cypher S microscope (Oxford Instruments, Asylum Research). A specimen for AFM imaging was prepared by spin-casting a THF solution of polymer onto a highly oriented pyrolytic graphite (HOPG) or mica substrate at ca. 1,500 rpm. AFM imaging was carried out at room temperature (ca. 20 °C) in air. NIH3T3 cells were cultured in DMEM medium. Cells were incubated with poly(L-PEGI) aggregates (5.0 × 10<sup>-6</sup> mol L<sup>-1</sup>) for 4 h, washed with PBS, stained with organelle dyes, and observed by CLSM. To conduct a flow cytometry apoptosis assay, incubate cells with poly(L-PEGI) aggregates under designated conditions, and analyze apoptotic cell populations via flow cytometry according to standard protocols.

### X-ray Crystallographic Study.

Suitable single crystals of complexes were sealed in a thin-walled glass capillary for determining the single-crystal structure. Data collection was performed at -100 °C on a Bruker SMART diffractometer with graphite-monochromated Mo K $\alpha$  radiation ( $\lambda = 0.71073 \text{ \AA}$ ). The SMART program package was used to determine the unit-cell parameters. The absorption correction was

applied by using SADABS. The structures were solved by direct methods and refined on F2 by full-matrix least-squares techniques with anisotropic thermal parameters for non-hydrogen atoms. Hydrogen atoms were placed at calculated positions and were included in the structure calculation without further refinement of the parameters. All calculations were carried out using the SHELXS-97 program. Molecular structures were generated using ORTEP program. Crystallographic data (excluding structure factors) have been deposited with the Cambridge Crystallographic Data Centre as supplementary publication nos. CCDC-2326930 (**1b**) and contain supplementary crystallographic data for this paper. These data can be obtained free of charge from The Cambridge Crystallographic Data Centre via [www.ccdc.cam.ac.uk/data\\_request/cif](http://www.ccdc.cam.ac.uk/data_request/cif).

**Scheme S1.** Synthesis of bis(oxazolinyphenyl)amido palladium complexes **1a-d**.

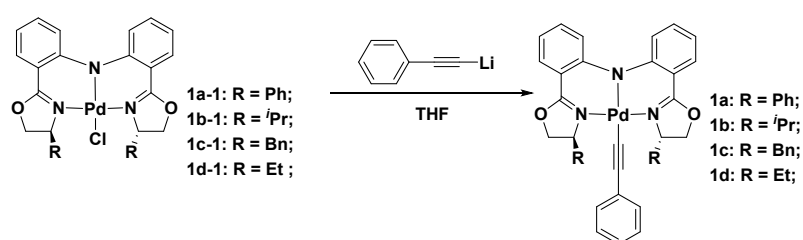

**Synthesis of [Ph<sub>2</sub>-(*S,S*)-BOZ]PdC≡CC<sub>6</sub>H<sub>5</sub> (**1a**):** Under nitrogen atmosphere, complex **1a-1** (2.4 g, 4 mmol) was dissolved in THF (50 mL), then LiC≡CC<sub>6</sub>H<sub>5</sub> (0.5 g, 4.4 mmol) added and the mixture was stirred at room temperature for 2 hours. Finally, the mixture was filtered and concentrated under reduced pressure, the residue was recrystallized from a mixture solvents of toluene and hexane (toluene/hexane = 3/1, v/v) at -30 °C to afford complex **1a** as a dark red solid (1.97 g, 74% yield). <sup>1</sup>H NMR (400 MHz, CDCl<sub>3</sub>): δ 7.67 (dd, *J* = 8.0, 1.5 Hz, 1H), 7.46 – 7.05 (m, 9H), 6.68 (t, *J* = 7.2 Hz, 1H), 5.91 (dd, *J* = 10.0, 5.0 Hz, 1H), 4.78 (dd, *J* = 9.9, 8.7 Hz, 1H), 4.32 (dd, *J* = 8.5, 5.0 Hz, 1H); <sup>13</sup>C NMR (100 MHz, CDCl<sub>3</sub>): δ 162.72, 154.16, 142.03, 132.56, 131.22, 130.35, 128.89, 127.96, 127.68, 126.72, 125.37, 122.91, 117.29, 114.21, 102.00, 99.56, 75.55, 69.99.

**Synthesis of [iPr<sub>2</sub>-(*S,S*)-BOZ]PdC≡CC<sub>6</sub>H<sub>5</sub> (**1b**):** The synthetic procedure was the same with that of compound **1a**. (dark red solid, 72% yield). <sup>1</sup>H NMR (400 MHz, CDCl<sub>3</sub>): δ 7.64 (dd, *J* = 8.0, 1.7 Hz, 1H), 7.34 (dd, *J* = 8.2, 1.2 Hz, 1H), 7.25 – 7.18 (m, 2H), 7.16 – 7.06 (m, 2H), 6.68 – 6.62 (m, 1H), 4.93 – 4.81 (m, 1H), 4.63 (dd, *J* = 9.6, 8.6 Hz, 1H), 4.30 (dd, *J* = 8.5, 5.3 Hz, 1H), 2.14 (dq, *J* = 15.1, 7.6, 3.0 Hz, 1H), 1.93 – 1.79 (m, 1H), 0.89 (dd, *J* = 9.6, 5.3 Hz, 4H); <sup>13</sup>C NMR (100 MHz, CDCl<sub>3</sub>): δ 161.68, 153.92, 132.34, 131.41, 130.18, 128.09, 127.57, 125.65, 122.96, 117.32, 114.52, 102.38, 97.85, 72.14, 67.62, 29.30, 8.77.

**Synthesis of [Bn<sub>2</sub>-(*S,S*)-BOZ]PdC≡CC<sub>6</sub>H<sub>5</sub> (**1c**):** The synthetic procedure was the same with that of compound **1a**. (dark red solid, 73% yield). <sup>1</sup>H NMR (400 MHz, CDCl<sub>3</sub>): δ 7.60 (dd, *J* = 8.0, 1.5 Hz, 1H), 7.44 (d, *J* = 7.2 Hz, 1H), 7.36 – 7.27 (m, 3H), 7.23 – 7.09 (m, 4H), 6.67 (t, *J* = 7.4 Hz, 1H), 5.34 – 5.19 (m, 1H), 4.53 (t, *J* = 9.1 Hz, 1H), 4.40 (dd, *J* = 8.8, 4.9 Hz, 1H), 3.55 (dd, *J* = 13.5, 3.4 Hz, 1H), 3.04 (dd, *J* = 13.5, 8.6 Hz, 1H); <sup>13</sup>C NMR (100 MHz, CDCl<sub>3</sub>): δ 162.18, 153.80,

136.36, 132.42, 131.55, 130.17, 129.83, 128.46, 128.04, 126.65, 125.75, 122.97, 117.38, 114.40, 102.71, 100.00, 71.43, 67.55, 41.95.

**Synthesis of [Et<sub>2</sub>-(*S,S*)-BOZ]PdC≡CC<sub>6</sub>H<sub>5</sub> (**1d**):** The synthetic procedure was the same with that of compound **1a**. (dark red solid, 79% yield). <sup>1</sup>H NMR (400 MHz, CDCl<sub>3</sub>): δ 7.62 (d, *J* = 7.9 Hz, 1H), 7.33 (d, *J* = 7.7 Hz, 1H), 7.21 (t, *J* = 7.1 Hz, 2H), 7.11 (dt, *J* = 15.2, 7.6 Hz, 2H), 6.66 (t, *J* = 7.4 Hz, 1H), 4.98 – 4.79 (m, 1H), 4.50 (t, *J* = 9.4 Hz, 1H), 4.38 (dd, *J* = 8.6, 5.1 Hz, 1H), 2.84 – 2.66 (m, 1H), 0.93 (d, *J* = 7.0 Hz, 3H), 0.77 (d, *J* = 6.8 Hz, 3H); <sup>13</sup>C NMR (100 MHz, CDCl<sub>3</sub>): δ 161.42, 153.96, 132.32, 131.30, 130.09, 127.96, 127.40, 125.53, 122.74, 117.18, 114.40, 102.39, 97.50, 70.95, 68.22, 31.69, 18.77, 13.97.

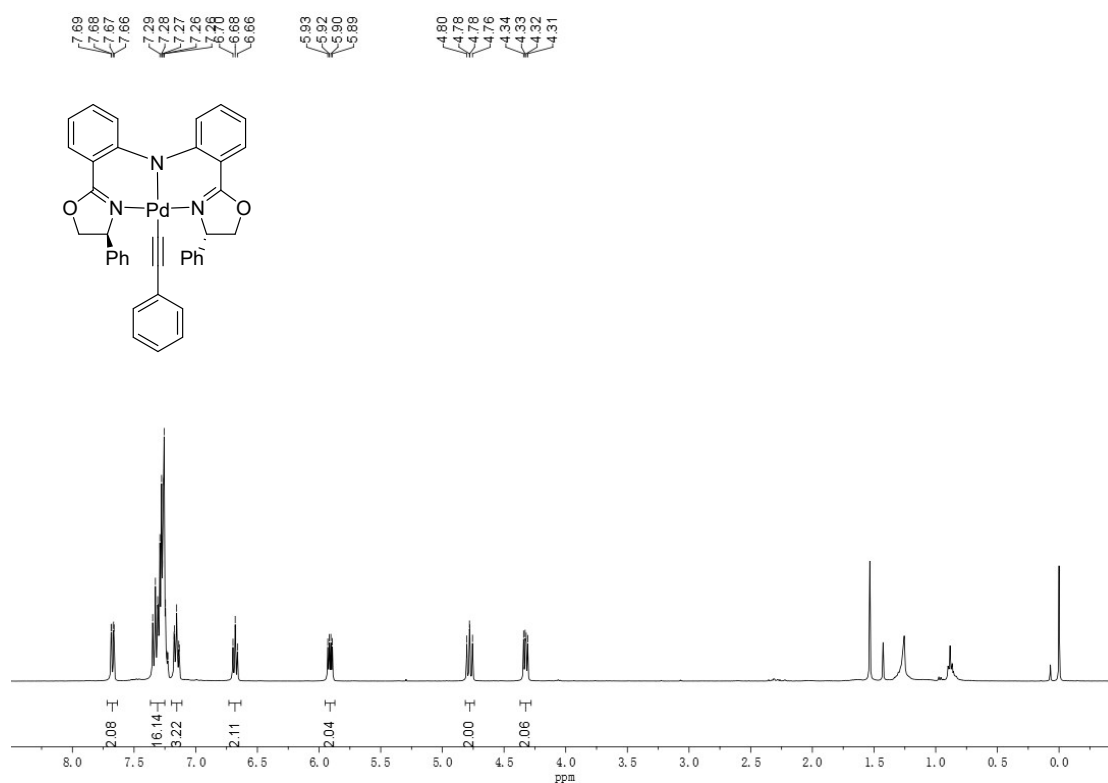

**Figure S1.** <sup>1</sup>H NMR spectrum of [Ph<sub>2</sub>-(*S,S*)-BOZ]PdC≡CC<sub>6</sub>H<sub>5</sub> (**1a**).

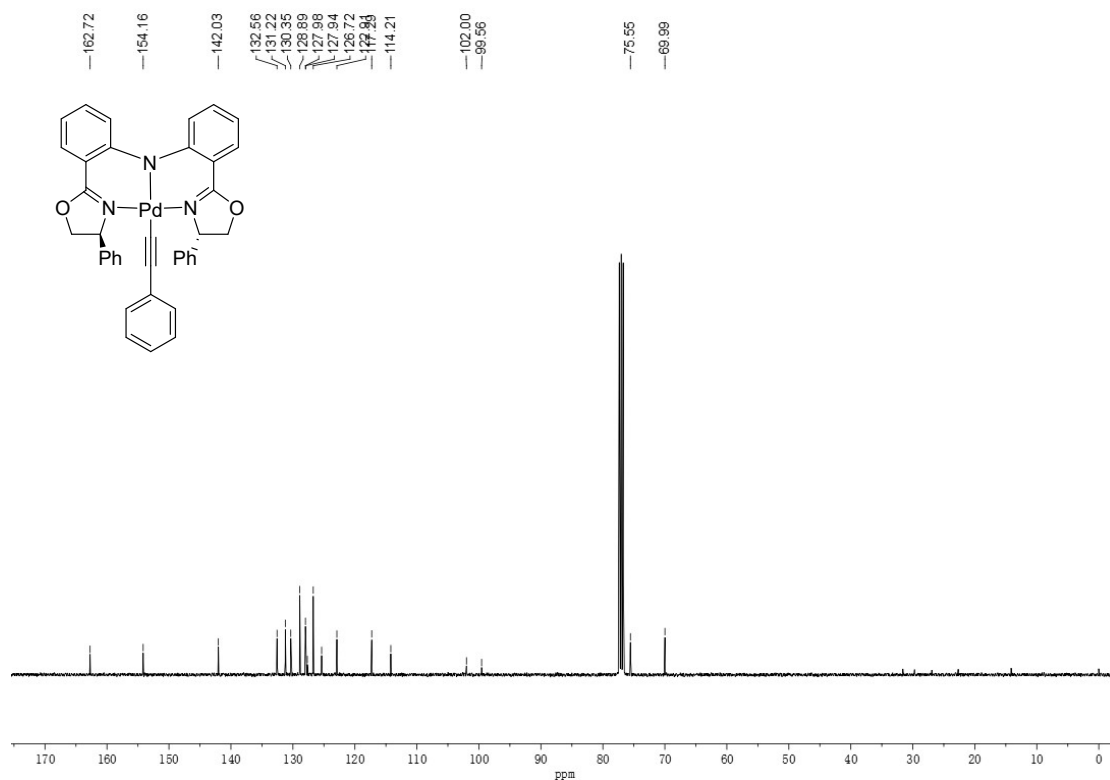

**Figure S2.**  $^{13}\text{C}$  NMR spectrum of  $[\text{Ph}_2\text{-(S,S)-BOZ}]\text{PdC}\equiv\text{CC}_6\text{H}_5$  (**1a**).

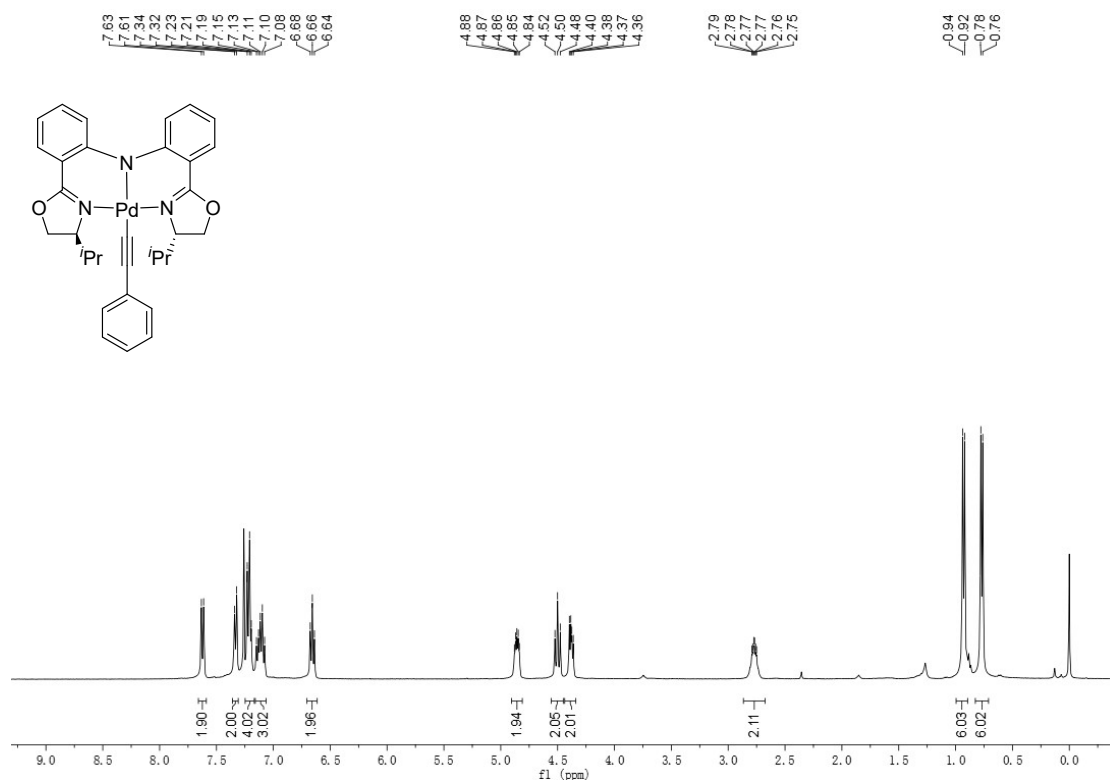

**Figure S3.**  $^1\text{H}$  NMR spectrum of  $[\text{iPr}_2\text{-(S,S)-BOZ}]\text{PdC}\equiv\text{CC}_6\text{H}_5$  (**1b**).

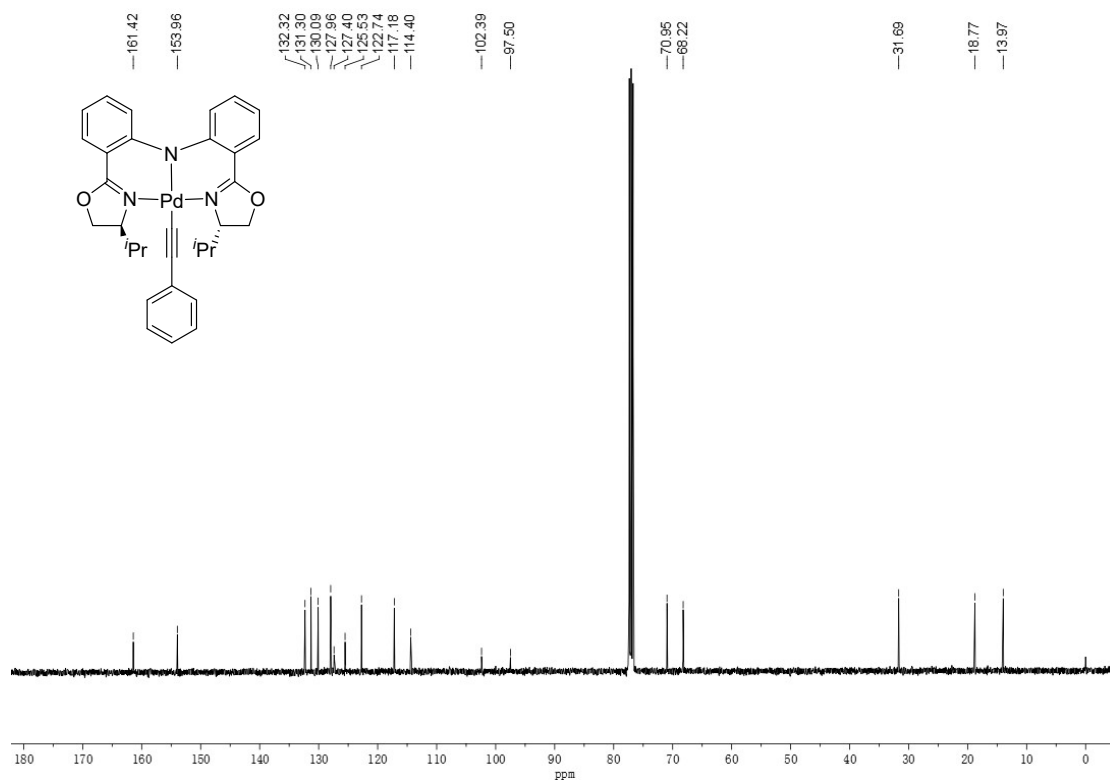

**Figure S4.**  $^{13}\text{C}$  NMR spectrum of  $[\text{iPr}]_2\text{-}(S,S)\text{-BOZPdC}\equiv\text{CC}_6\text{H}_5$  (**1b**).

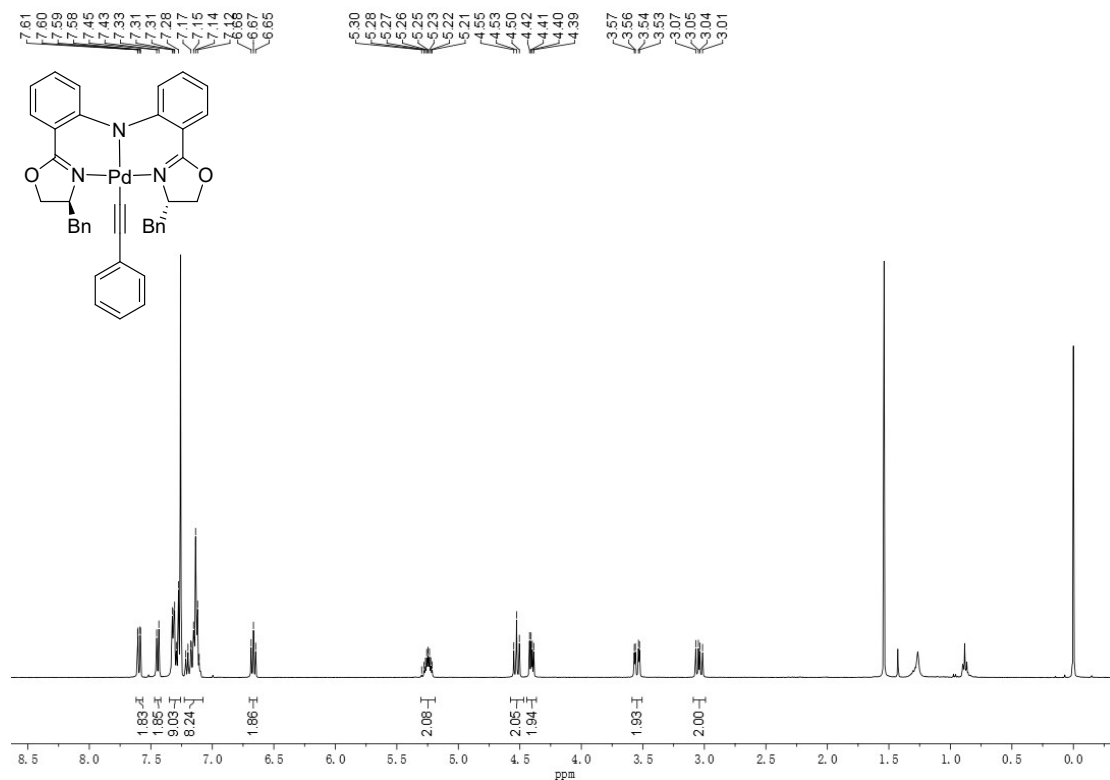

**Figure S5.**  $^1\text{H}$  NMR spectrum of  $[\text{Bn}]_2\text{-}(S,S)\text{-BOZPdC}\equiv\text{CC}_6\text{H}_5$  (**1c**).

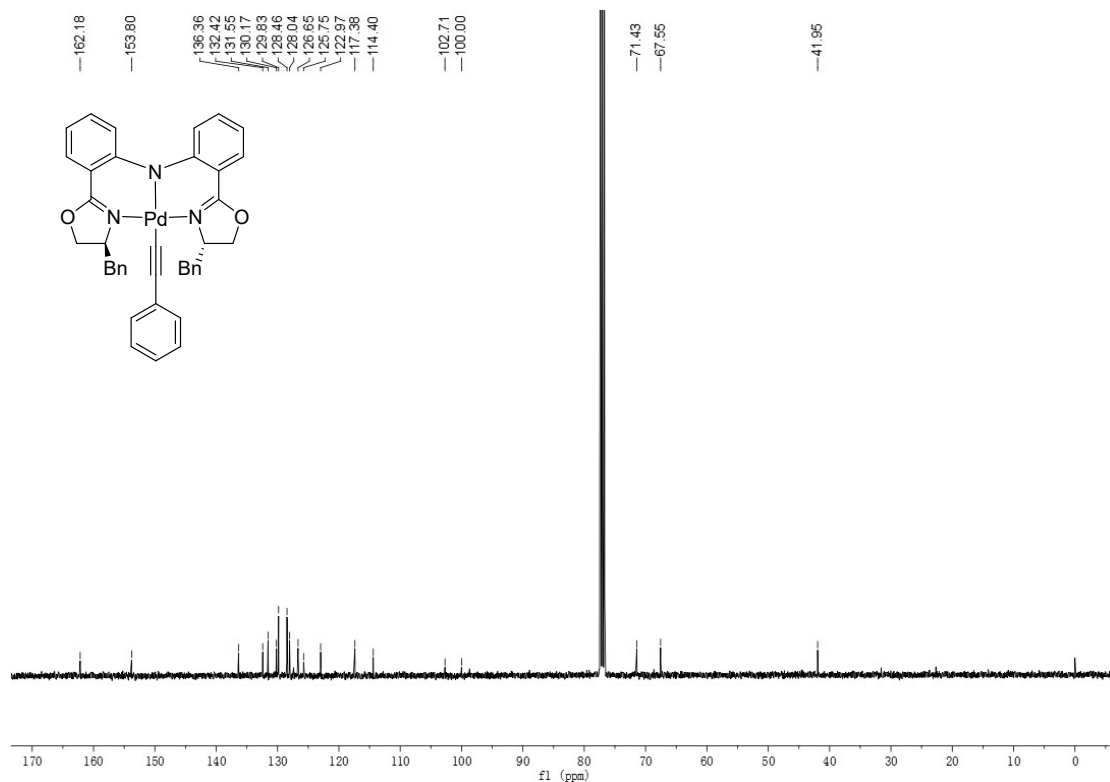

**Figure S6.**  $^{13}\text{C}$  NMR spectrum of  $[\text{Bn}_2\text{-(S,S)-BOZ}]\text{PdC}\equiv\text{CC}_6\text{H}_5$  (1c).

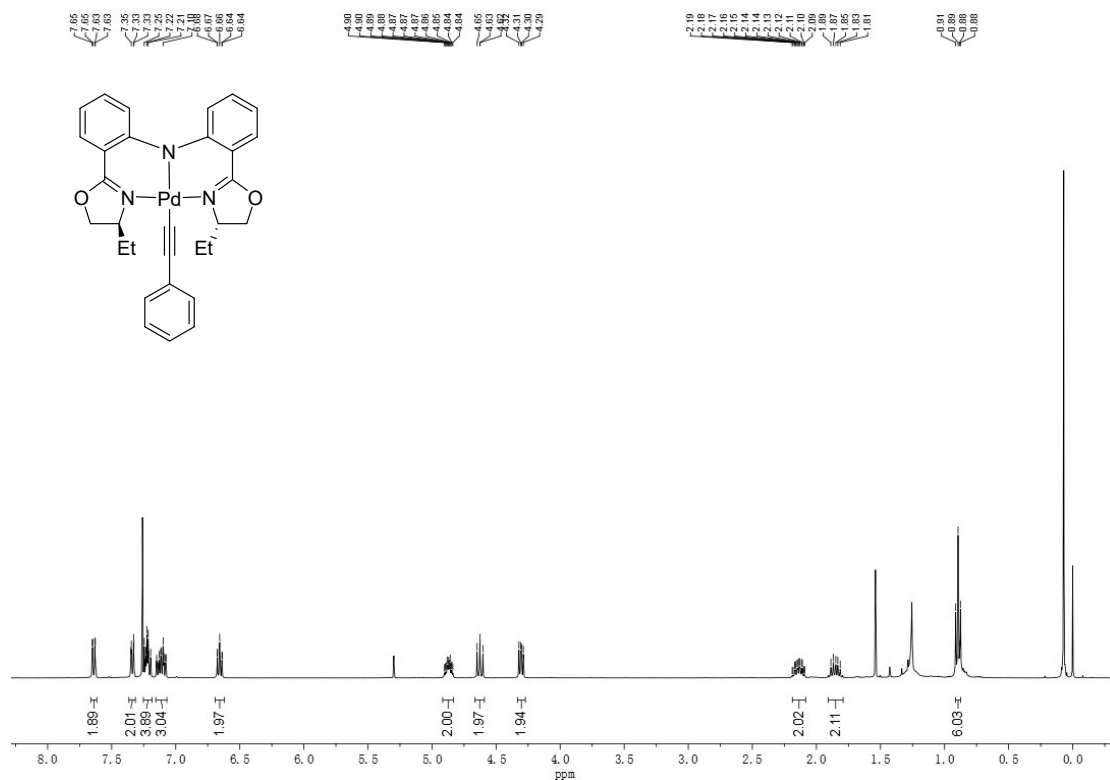

**Figure S7.**  $^1\text{H}$  NMR spectrum of  $[\text{Et}_2\text{-(S,S)-BOZ}]\text{PdC}\equiv\text{CC}_6\text{H}_5$  (1d).

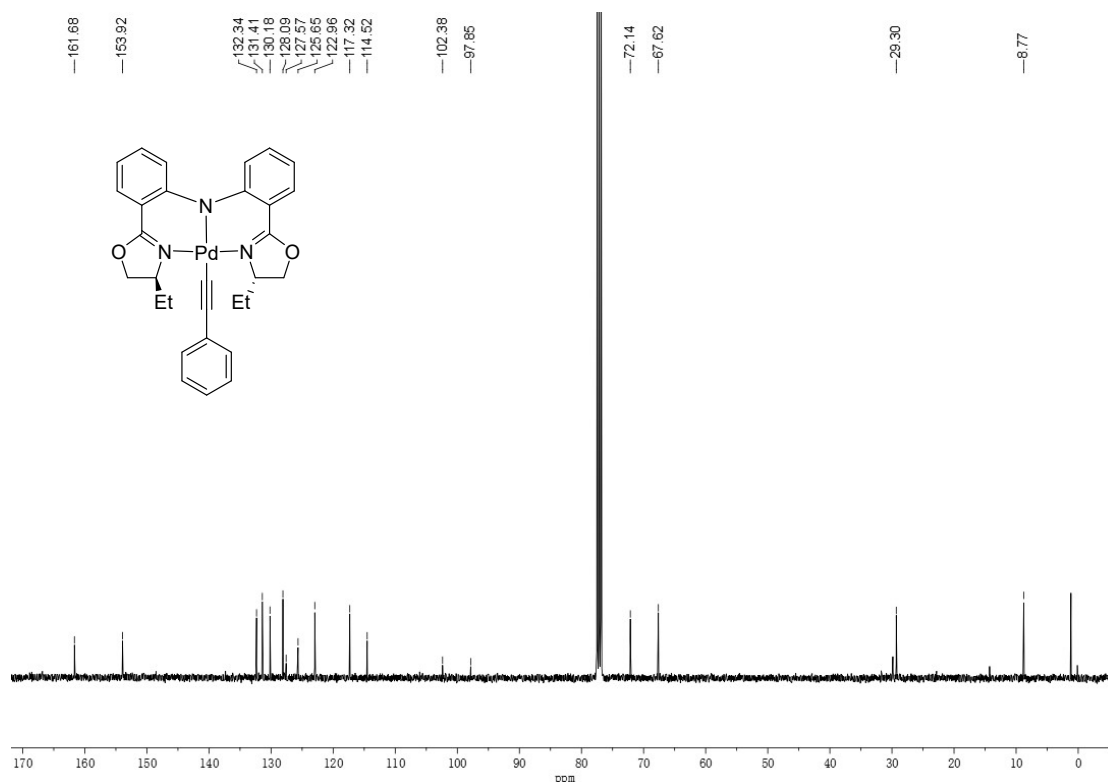

**Figure S8.** <sup>13</sup>C NMR spectrum of [Et<sub>2</sub>-(S,S)-BOZ]PdC≡CC<sub>6</sub>H<sub>5</sub> (**1d**).

**Scheme S2.** Synthesis of 4-ethoxycarbonyl phenyl isocyanide (**EPI**)

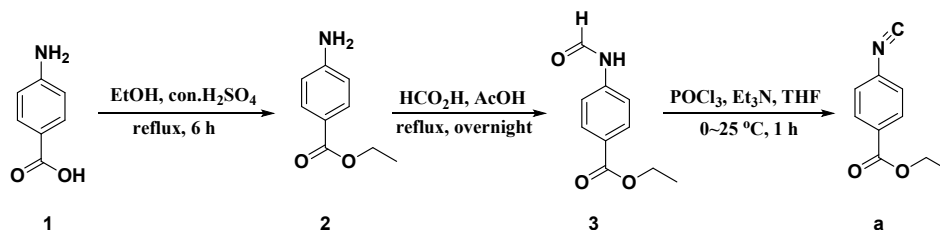

**Synthesis of ethyl 4-aminobenzoate (2):** To a solution of **1** (3.43 g, 25 mmol) in 100 mL of EtOH was slowly added 13.6 mL of aqueous con. H<sub>2</sub>SO<sub>4</sub> (250 mmol) at room temperature. The mixture was refluxed for 6 h, cooled to room temperature, neutralized with a saturated K<sub>2</sub>CO<sub>3</sub> aqueous solution and extracted with ethyl acetate (3 × 70 mL), the combined organic phases were washed with brine (2 × 50 mL), dried over anhydrous Na<sub>2</sub>SO<sub>4</sub> and concentrated in vacuo, the residue was purified by column chromatography (silica gel, 5:1-3:1 hexane to ethyl acetate, v/v) to afford compound **2** as a white solid (3.90 g, 94% yield). <sup>1</sup>H NMR (CDCl<sub>3</sub>, 400 MHz): δ 1.36 (t, *J* = 7.0 Hz, 3H), 4.06 (br, 2H), 4.31 (q, *J* = 7.2 Hz, 2H), 6.63 (d, *J* = 8.8 Hz, 2H), 7.85 (d, *J* = 8.4 Hz, 2H).

**Synthesis of ethyl 4-formamidobenzoate (3):** compound **2** (3.90 g, 23.6 mmol) was dissolved in a mixture of formic acid (40 mL) and acetic acid (8 mL), the resulting mixture was refluxed overnight. After the reaction mixture was cooled to room temperature, the solvents were removed under reduced pressure, the residue was washed with saturated aqueous Na<sub>2</sub>CO<sub>3</sub> (50 mL) and filtered, the filter cake was washed twice with water and dried in vacuum to afford crude compound **3** as a white solid (4.22 g, crude), this compound was used directly for the next step without purification.

**Synthesis of 4-ethoxycarbonyl phenyl isocyanide (a):** compound **3** (4.22 g, 21.8 mmol) and triethylamine (20 mL, 146 mmol) were dissolved in dry THF (35 mL) under an atmosphere of nitrogen, after the mixture was cooled to 0 °C, POCl<sub>3</sub> (3.4 mL, 37.2 mmol) was added dropwise to the mixture, the resulting mixture was slowly warm to room temperature and stirred for 1h, then the reaction mixture was slowly poured into 30 mL saturated aqueous Na<sub>2</sub>CO<sub>3</sub> and stirred at room temperature for 0.5 h, the mixture was extracted with CH<sub>2</sub>Cl<sub>2</sub> (3 × 50 mL), the combined organic layers were washed with brine, dried over anhydrous Na<sub>2</sub>SO<sub>4</sub> and concentrated under reduced pressure, the residue was purified by column chromatography (neutral Al<sub>2</sub>O<sub>3</sub>, 12:1 hexane to ethyl acetate, v/v) to afford the desired compound **a** as a brown solid (3.13 g, 82% yield). <sup>1</sup>H NMR (CDCl<sub>3</sub>, 400 MHz): δ 1.40 (t, *J* = 7.2 Hz, 3H), 4.39 (q, *J* = 7.2 Hz, 2H), 7.43 (d, *J* = 8.4 Hz, 2H), 7.43 (d, *J* = 8.4 Hz, 2H), 8.08 (dt, *J* = 2.0, 8.8 Hz, 2H); <sup>13</sup>C NMR (CDCl<sub>3</sub>, 100 MHz): δ 14.33, 61.66, 126.48, 129.94, 130.88, 131.38, 165.06, 167.10.

**Scheme S3. Synthesis of 2-naphthyl Isocyanide (NI)**

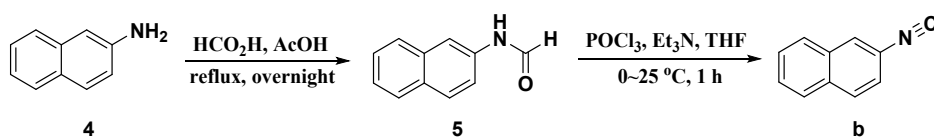

**Synthesis of N-(naphthalen-2-yl)formamide (5):** compound **4** (5 g, 34.92 mmol) was dissolved in a mixture solvents of formic acid (50 mL) and acetic acid (10 mL), the resulting mixture was refluxed overnight. After the reaction mixture was cooled to room temperature, the solvents were removed by evaporation. The residue was dissolved in CH<sub>2</sub>Cl<sub>2</sub> (200 mL) and washed with saturated aqueous Na<sub>2</sub>CO<sub>3</sub> (2 × 50 mL), the separated organic phase was dried over anhydrous Na<sub>2</sub>SO<sub>4</sub>, concentrated under reduced pressure, and the residue was purified by column chromatography (silica gel, 3:1-1:1 hexane to ethylacetate, v/v) to afford compound **5** as a white solid (4.95 g, 82.8% yield). <sup>1</sup>H NMR (d<sub>6</sub>-DMSO, 400 MHz): δ 7.41 (dt, *J* = 0.8, 7.2 Hz, 1H), 7.48 (dt, *J* = 0.8, 7.2 Hz, 1H), 7.57 (dd, *J* = 2.0, 8.8 Hz, 0.8H), 7.67 (d, *J* = 1.6 Hz, 0.2H), 7.78 (d, *J* = 8.4 Hz, 0.2H), 7.83 (t, *J* = 6.8 Hz, 1.5H), 7.86 (d, *J* = 5.6 Hz, 0.6H), 7.88 (d, *J* = 5.2 Hz, 0.5H), 8.30 (d, *J* = 1.2 Hz, 0.7H), 8.37 (d, *J* = 1.6 Hz, 0.7H), 8.94 (d, *J* = 11.2 Hz, 0.2H), 10.33 (d, *J* = 11.2 Hz, 0.2H), 10.40 (s, 0.8H).

**Synthesis of 2-naphthyl Isocyanide (b):** compound **5** (4.95 g, 28.9 mmol) and triethylamine (27.0 mL, 193.6 mmol) were dissolved in dry THF (60 mL) under an atmosphere of nitrogen, after the mixture was cooled to 0 °C, POCl<sub>3</sub> (4.5 mL, 49.3 mmol) was added dropwise to the mixture, the resulting mixture was slowly warm to room temperature and stirred for 1h, then the reaction mixture was slowly poured into 50 mL saturated aqueous Na<sub>2</sub>CO<sub>3</sub> and stirred at room temperature for 0.5 h, the mixture was extracted with CH<sub>2</sub>Cl<sub>2</sub> (3 × 70 mL), the combined organic layers were washed with brine, dried over anhydrous Na<sub>2</sub>SO<sub>4</sub> and concentrated under reduced pressure, the residue was purified by column chromatography (neutral Al<sub>2</sub>O<sub>3</sub>, 12:1 hexane to ethyl acetate, v/v) to afford the desired compound **b** as a white solid (3.81 g, 86% yield). <sup>1</sup>H NMR (CDCl<sub>3</sub>, 400 MHz): δ 6.86 (dd, *J* = 1.8, 8.6 Hz, 1H), 7.11-7.16 (m, 3H), 7.21 (s, 1H), 7.23-7.25 (m, 1H), 7.32-7.37 (m, 1H); <sup>13</sup>C NMR (CDCl<sub>3</sub>, 100 MHz): δ 123.34, 123.88, 125.79, 127.61, 127.77, 127.96,

127.99, 129.72, 132.74, 132.86, 164.31.

**Scheme S4. 4-isocyano-4'-(1,2,2-triphenylvinyl)-1,1'-biphenyl (ITPB)**

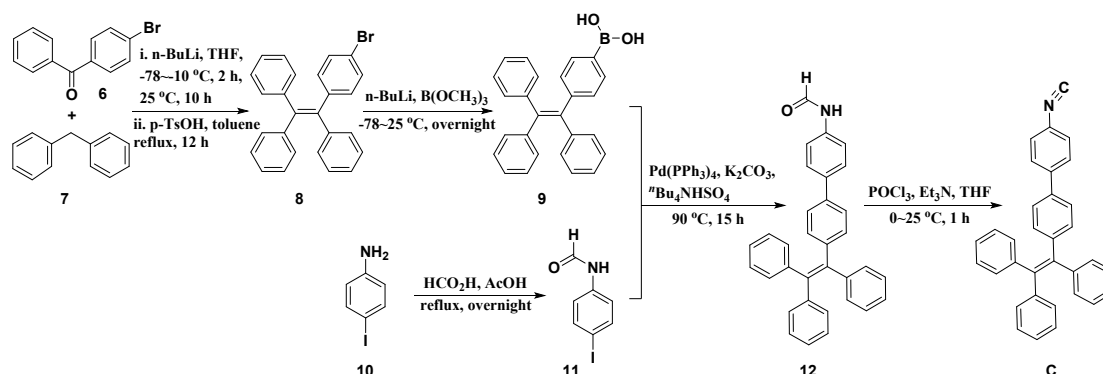

**Synthesis of (2-(4-bromophenyl)ethene-1,1,2-triyl)tribenzene (8):** Under nitrogen atmosphere, compound 7 (8.60 g, 51 mmol) was dissolved in 50 mL of dry THF, after the solution was cooled to -78 °C, n-BuLi (35 mL, 1.6 M in hexane) was added dropwise and the resulting mixture was stirred at -10 °C for 2 h, then compound 6 (11.1 g, 42.4 mmol) was added dropwise and the mixture was allowed to warm to room temperature and stirred for 10 h. Then the reaction mixture was quenched with an aqueous solution of ammonium chloride, extracted with CH<sub>2</sub>Cl<sub>2</sub> (3 × 100 mL), the combined organic layers were dried over anhydrous Na<sub>2</sub>SO<sub>4</sub> and evaporated to remove the solvent. The residue was dissolved in toluene (100 mL), p-toluene sulfonic acid (1.06 g, 6.20 mmol) was added, the resulting mixture was refluxed for 12 h. After the reaction mixture was cooled to room temperature, the solvent was removed under reduced pressure, the residue was purified by column chromatography (silica gel, 20:1 hexane to ethyl acetate, v/v) to afford the desired compound 8 as a white solid (11.7 g, 68% yield). <sup>1</sup>H NMR (CDCl<sub>3</sub>, 400 MHz): δ 6.89 (d, *J* = 8.2 Hz, 2H), 7.08 (m, 15H), 7.22 (d, *J* = 8.2 Hz, 2H).

**Synthesis of (4-(1,2,2-triphenylvinyl)phenyl)boronic acid (9):** Under nitrogen atmosphere, compound 8 (2 g, 4.86 mmol) was dissolved in 20 mL of dry THF, after the solution was cooled to -78 °C, n-BuLi (2.43 mL, 2.4 M in hexane) was added dropwise and the mixture was stirred at -78 °C for 30 min. Then a solution of trimethyl borate (0.76 g, 7.29 mmol) in dry THF (10 mL) was added dropwise, the resulting mixture was stirred at -78 °C for 30 min, then allowed to warm to room temperature and stirred overnight. The reaction mixture was quenched with 10% hydrogen chloride aqueous solution, extracted with ethyl acetate (3 × 30 mL), the combined organic layers were dried over anhydrous Na<sub>2</sub>SO<sub>4</sub> and concentrated under reduced pressure to afford crude compound 9 as white solid (2.40 g, crude), this compound was used directly for the next step without purification.

**Synthesis of N-(4-iodophenyl)formamide (11):** the synthetic procedure was the same with that of compound 3, and the crude product was directly used for the next step without further purification.

**Synthesis of N-(4'-(1,2,2-triphenylvinyl)-[1,1'-biphenyl]-4-yl)formamide (12):** Under nitrogen atmosphere, compound 9 (6 g, crude), compound 11 (3.33 g, crude) were dissolved in a mixture

solvents of toluene (100 mL) and water (50 mL), then Pd(PPh<sub>3</sub>)<sub>4</sub> (386 mg, 0.33 mmol), K<sub>2</sub>CO<sub>3</sub> (2.75 g, 19.9 mmol) and tetrabutylammonium hydrogen sulfate (452 mg, 1.33 mmol) were added, the resulting mixture was stirred at 90 °C for 15 h. after the reaction mixture was cooled to room temperature, the organic layer was separated and the aqueous phase was extracted with ethyl acetate (3 × 80 mL), the combined organic layers were dried over anhydrous Na<sub>2</sub>SO<sub>4</sub> and concentrated under reduced pressure, the residue was purified by column chromatography (silica gel, 2:1 hexane: ethyl acetate, v/v) to afford the desired compound **12** as a light yellow solid (6.5 g). <sup>1</sup>H NMR (CDCl<sub>3</sub>, 400 MHz): δ 7.02-7.13 (m, 18H), 7.17 (s, 0.5H), 7.31 (dd, *J* = 2.0, 8.4 Hz, 2H), 7.51-7.58 (m, 3H), 7.64 (d, *J* = 11.6 Hz, 0.6H), 8.39 (d, *J* = 1.6 Hz, 0.5H), 8.71 (d, *J* = 11.6 Hz, 0.4H).

**Synthesis of 4-isocyano-4'-(1,2,2-triphenylvinyl)-1,1'-biphenyl (c):** the synthetic procedure was the same with that of compound **a**. (light green solid, 79% yield). <sup>1</sup>H NMR (CDCl<sub>3</sub>, 400 MHz): δ 7.03-7.15 (m, 17H), 7.32 (d, *J* = 8.0 Hz, 2H), 7.40 (d, *J* = 8.4 Hz, 2H), 7.56 (dt, *J* = 1.6, 8.4, 2H); <sup>13</sup>C NMR (CDCl<sub>3</sub>, 100 MHz): δ 125.50, 126.36, 126.69, 126.73, 126.76, 126.83, 127.81, 127.84, 127.90, 127.95, 131.43, 131.46, 131.50, 132.15, 137.06, 140.28, 141.75, 141.99, 143.64, 143.69, 144.02, 164.69.

**Scheme S5.** Synthesis of (*1S,2R,5S*)-2-isopropyl-5-methylcyclohexyl 4-isocyanobenzoate (**D-IMCI**) and (*1R,2S,5R*)-2-isopropyl-5-methylcyclohexyl 4-isocyanobenzoate (**L-IMCI**)

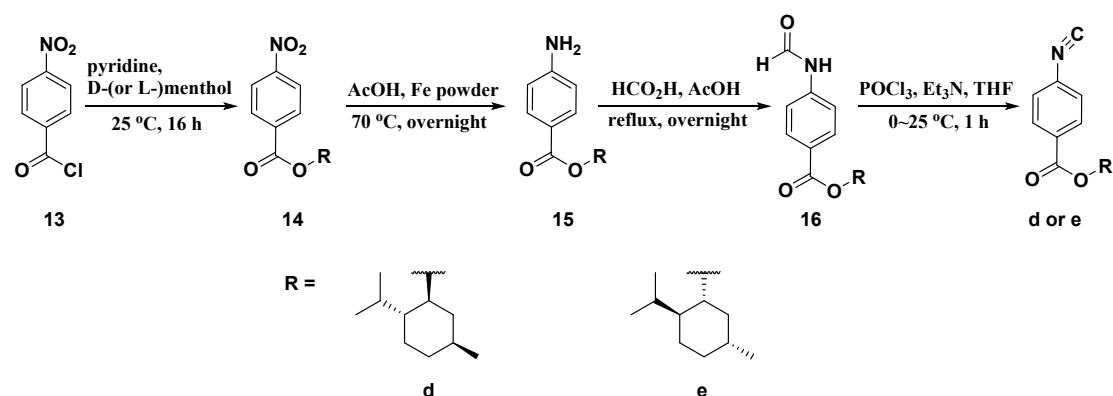

**Synthesis of (*1S,2R,5S*)-2-isopropyl-5-methylcyclohexyl 4-nitrobenzoate (14d):** Under nitrogen atmosphere, compound **13** (1.8 g, 9.7 mmol) was dissolved in dry pyridine (20 mL), then D-menthol (1.5 g, 9.7 mmol) was added in one portion and the resulting mixture was stirred at room temperature for 16 h, after removal of pyridine under reduced pressure, the residue was dissolved in CH<sub>2</sub>Cl<sub>2</sub> (30 mL) and washed with 1 N HCl, saturated NaHCO<sub>3</sub> aqueous solution and brine, the separated organic layer was dried over anhydrous Na<sub>2</sub>SO<sub>4</sub> and concentrated under reduced pressure, the residue was purified by column chromatography (silica gel, 10 : 1 hexane to ethyl acetate, v/v) to afford the desired compound **14d** as a yellow solid (2.40 g, 81% yield) <sup>1</sup>H NMR (CDCl<sub>3</sub>, 400 MHz): δ 0.79 (d, *J* = 7.2 Hz, 3H), 0.93 (t, *J* = 6.4 Hz, 6H), 0.88-0.98 (m, 1H), 1.08-1.17 (m, 2H), 1.54-1.62 (m, 2H), 1.74 (d, *J* = 12.4 Hz, 2H), 1.88-1.95 (m, 1H), 2.12 (d, *J* = 11.6 Hz, 1H), 4.97 (dt, *J* = 4.4, 11.2 Hz, 1H), 8.20 (d, *J* = 8.8 Hz, 2H), 8.28 (d, *J* = 8.4 Hz, 2H).

**Synthesis of (*1S,2R,5S*)-2-isopropyl-5-methylcyclohexyl 4-aminobenzoate (15d):** Under nitrogen atmosphere, compound **14d** (2.40 g, 7.86 mmol) was dissolved in 30 mL of acetic acid,

then iron powder (4.4 g, 78.6 mmol) was added in one portion, the resulting mixture was stirred at 70 °C overnight. Then the mixture was filtered and the filter cake was washed with ethyl acetate (20 mL), the filtrate was concentrated under reduced pressure, the residue was purified by column chromatography (silica gel, 4 : 1 hexane to ethyl acetate, v/v) to afford the desired compound **15d** as yellow oil (1.61 g, 75% yield) <sup>1</sup>H NMR (CDCl<sub>3</sub>, 400 MHz): δ 0.78 (d, *J* = 7.2 Hz, 3H), 0.90 (d, *J* = 6.8 Hz, 3H), 0.91 (d, *J* = 6.4 Hz, 3H), 0.85-0.96 (m, 1H), 1.02-1.14 (m, 2H), 1.48-1.54 (m, 2H), 1.69-1.72 (m, 2H), 1.94-1.98 (m, 1H), 2.09-2.12 (m, 1H), 4.04 (s, 2H), 4.87 (dt, *J* = 4.4, 10.8 Hz, 1H), 6.63 (d, *J* = 8.4 Hz, 2H), 7.85 (d, *J* = 8.8 Hz, 2H).

**Synthesis of (1*S*,2*R*,5*S*)-2-isopropyl-5-methylcyclohexyl 4-formamidobenzoate (16d):** compound **15d** (1.61 g, 5.85 mmol) was dissolved in a mixture of formic acid (16 mL) and acetic acid (3 mL), the resulting mixture was refluxed overnight. After the reaction mixture was cooled to room temperature, the solvents were removed under reduced pressure, the residue was washed with saturated aqueous Na<sub>2</sub>CO<sub>3</sub> (10 mL) and filtered, the filter cake was washed twice with water and dried in vacuum to afford crude compound **16d** as a white solid (1.70 g, crude), this compound was used directly for the next step without purification.

**Synthesis of (1*S*,2*R*,5*S*)-2-isopropyl-5-methylcyclohexyl 4-isocyanobenzoate (d):** compound **16d** (1.70 g, crude) and triethylamine (5.2 mL, 37.5 mmol) were dissolved in dry THF (15 mL) under an atmosphere of nitrogen, after the mixture was cooled to 0 °C, POCl<sub>3</sub> (0.9 mL, 9.5 mmol) was added dropwise to the mixture, the resulting mixture was slowly warm to room temperature and stirred for 1h, then the reaction mixture was slowly poured into 20 mL saturated aqueous Na<sub>2</sub>CO<sub>3</sub> and stirred at room temperature for 0.5 h, the mixture was extracted with CH<sub>2</sub>Cl<sub>2</sub> (3 × 20 mL), the combined organic layers were washed with brine, dried over anhydrous Na<sub>2</sub>SO<sub>4</sub> and concentrated under reduced pressure, the residue was purified by column chromatography (neutral Al<sub>2</sub>O<sub>3</sub>, 12 : 1 hexane to ethyl acetate, v/v) to afford the desired compound **d** as a black syrup (1.35 g, 81% yield for two steps) <sup>1</sup>H NMR (CDCl<sub>3</sub>, 400 MHz): δ 0.77 (d, *J* = 6.8 Hz, 3H), 0.91 (dd, *J* = 5.6, 6.8 Hz, 6H), 0.86-0.96 (m, 1H), 1.05-1.17 (m, 2H), 1.50-1.59 (m, 2H), 1.70-1.74 (m, 2H), 1.86-1.94 (m, 1H), 2.07-2.12 (m, 1H), 4.93 (dt, *J* = 4.4, 10.8 Hz, 1H), 7.43 (d, *J* = 8.4 Hz, 2H), 8.07 (dt, *J* = 2.0, 8.8 Hz, 2H); <sup>13</sup>C NMR (CDCl<sub>3</sub>, 100 MHz): δ 16.60, 20.82, 22.10, 23.71, 26.66, 31.53, 34.32, 40.98, 47.30, 75.75, 126.48, 129.88, 130.90, 131.74, 164.58, 167.05.

The synthesis of (1*R*,2*S*,5*R*)-2-isopropyl-5-methylcyclohexyl 4-isocyanobenzoate (**e**) was the same with that of (1*S*,2*R*,5*S*)-2-isopropyl-5-methylcyclohexyl 4-isocyanobenzoate (**f**).

**Synthesis of (1*R*,2*S*,5*R*)-2-isopropyl-5-methylcyclohexyl 4-nitrobenzoate (14e):** (yellow solid, 83% yield). <sup>1</sup>H NMR (CDCl<sub>3</sub>, 400 MHz): δ 0.79 (d, *J* = 6.8 Hz, 3H), 0.93 (t, *J* = 6.2 Hz, 6H), 0.88-0.98 (m, 1H), 1.08-1.19 (m, 2H), 1.54-1.61 (m, 2H), 1.71-1.78 (m, 2H), 1.85-1.97 (m, 1H), 2.13 (d, *J* = 12.0 Hz, 1H), 4.97 (dt, *J* = 4.4, 10.8 Hz, 1H), 8.20 (d, *J* = 9.2 Hz, 2H), 8.28 (d, *J* = 8.8 Hz, 2H).

**Synthesis of (1*R*,2*S*,5*R*)-2-isopropyl-5-methylcyclohexyl 4-aminobenzoate (15e):** (yellow oil, 72% yield). <sup>1</sup>H NMR (DMSO-d<sub>6</sub>, 400 MHz): δ 0.73 (d, *J* = 6.8 Hz, 3H), 0.87 (t, *J* = 7.4 Hz, 6H), 0.82-0.92 (m, 1H), 0.97-1.09 (m, 2H), 1.43-1.49 (m, 2H), 1.62-1.66 (m, 2H), 1.82-1.89 (m, 1H),

1.92-1.95 (m, 1H), 4.72 (dt,  $J = 4.4, 10.8$  Hz, 1H), 5.92 (s, 2H), 6.56 (d,  $J = 8.8$  Hz, 2H), 7.62 (d,  $J = 8.8$  Hz, 2H).

**Synthesis of (1*R*,2*S*,5*R*)-2-isopropyl-5-methylcyclohexyl 4-isocyanobenzoate (d):** (black syrup, 80% yield).  $^1\text{H}$  NMR ( $\text{CDCl}_3$ , 400 MHz):  $\delta$  0.78 (d,  $J = 6.8$  Hz, 3H), 0.92 (t,  $J = 6.4$  Hz, 6H), 0.87-0.90 (m, 1H), 1.04-1.18 (m, 2H), 1.51-1.60 (m, 2H), 1.70-1.76 (m, 2H), 1.86-1.94 (m, 1H), 2.08-2.13 (m, 1H), 4.93 (dt,  $J = 4.4, 11.2$  Hz, 1H), 7.43 (d,  $J = 8.4$  Hz, 2H), 8.07 (dt,  $J = 2.0, 8.8$  Hz, 2H);  $^{13}\text{C}$  NMR ( $\text{CDCl}_3$ , 100 MHz):  $\delta$  16.63, 20.86, 22.13, 23.74, 26.69, 31.57, 34.35, 41.01, 47.35, 75.81, 126.52, 129.92, 130.94, 131.78, 164.63, 167.03.

**Scheme S6. Synthesis of diisopropyl 5-isocyanoisophthalate (DIPI)**

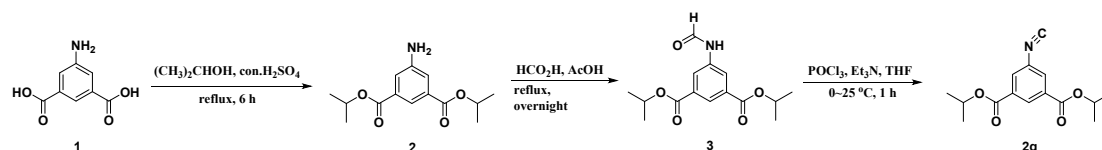

**Synthesis of diisopropyl 5-aminoisophthalate (2):** To a solution of **1** (5.43 g, 30 mmol) in 250 mL of  $(\text{CH}_3)_2\text{CHOH}$  was slowly added 32.64 mL of aqueous con.  $\text{H}_2\text{SO}_4$  (600 mmol) at room temperature. The mixture was refluxed for 6 h, cooled to room temperature, neutralized with a saturated  $\text{K}_2\text{CO}_3$  aqueous solution and extracted with ethyl acetate ( $3 \times 80$  mL), the combined organic phases were washed with brine ( $2 \times 50$  mL), dried over anhydrous  $\text{Na}_2\text{SO}_4$  and concentrated in vacuo, the residue was purified by column chromatography (silica gel, 5 : 1 – 3 : 1 hexane to ethyl acetate, v/v) to afford compound **2** as a white solid (7.55 g, 95% yield).  $^1\text{H}$  NMR ( $\text{CDCl}_3$ , 400 MHz):  $\delta$  8.03 (s, 1H), 7.49 (s, 2H), 5.24 (dt,  $J = 12.3, 6.1$  Hz, 2H), 3.90 (s, 2H), 1.37 (d,  $J = 6.2$  Hz, 12H).

**Synthesis of diisopropyl 5-formamidoisophthalate (3):** compound **2** (3.13 g, 11.8 mmol) was dissolved in a mixture of formic acid (20 mL) and acetic acid (4 mL), the resulting mixture was refluxed overnight. After the reaction mixture was cooled to room temperature, the solvents were removed under reduced pressure, the residue was washed with saturated aqueous  $\text{Na}_2\text{CO}_3$  (30 mL) and filtered, the filter cake was washed twice with water and dried in vacuum to afford crude compound **3** as a white solid (2.15 g, crude), this compound was used directly for the next step without purification.

**Synthesis of diisopropyl 5-isocyanoisophthalate (2g):** compound **3** (3.13 g, 11.8 mmol) and triethylamine (11 mL, 78.8 mmol) were dissolved in dry THF (30 mL) under an atmosphere of nitrogen, after the mixture was cooled to 0 °C,  $\text{POCl}_3$  (1.9 mL, 20 mmol) was added dropwise to the mixture, the resulting mixture was slowly warm to room temperature and stirred for 1h, then the reaction mixture was slowly poured into 30 mL saturated aqueous  $\text{Na}_2\text{CO}_3$  and stirred at room temperature for 0.5 h, the mixture was extracted with  $\text{CH}_2\text{Cl}_2$  ( $3 \times 50$  mL), the combined organic layers were washed with brine, dried over anhydrous  $\text{Na}_2\text{SO}_4$  and concentrated under reduced pressure, the residue was purified by column chromatography (neutral  $\text{Al}_2\text{O}_3$ , 12:1 hexane to ethyl acetate, v/v) to afford the desired compound **2g** as a brown solid (71% yield).  $^1\text{H}$  NMR ( $\text{CDCl}_3$ , 400 MHz):  $\delta$  8.60 (s, 1H), 8.11 (s, 2H), 5.22 (dt,  $J = 12.4, 6.2$  Hz, 2H), 1.33 (d,  $J = 6.2$  Hz, 12H);  $^{13}\text{C}$  NMR (100 MHz,  $\text{CDCl}_3$ ):  $\delta$  166.67, 163.56, 133.01, 131.07, 130.95, 126.95, 69.92, 21.86.

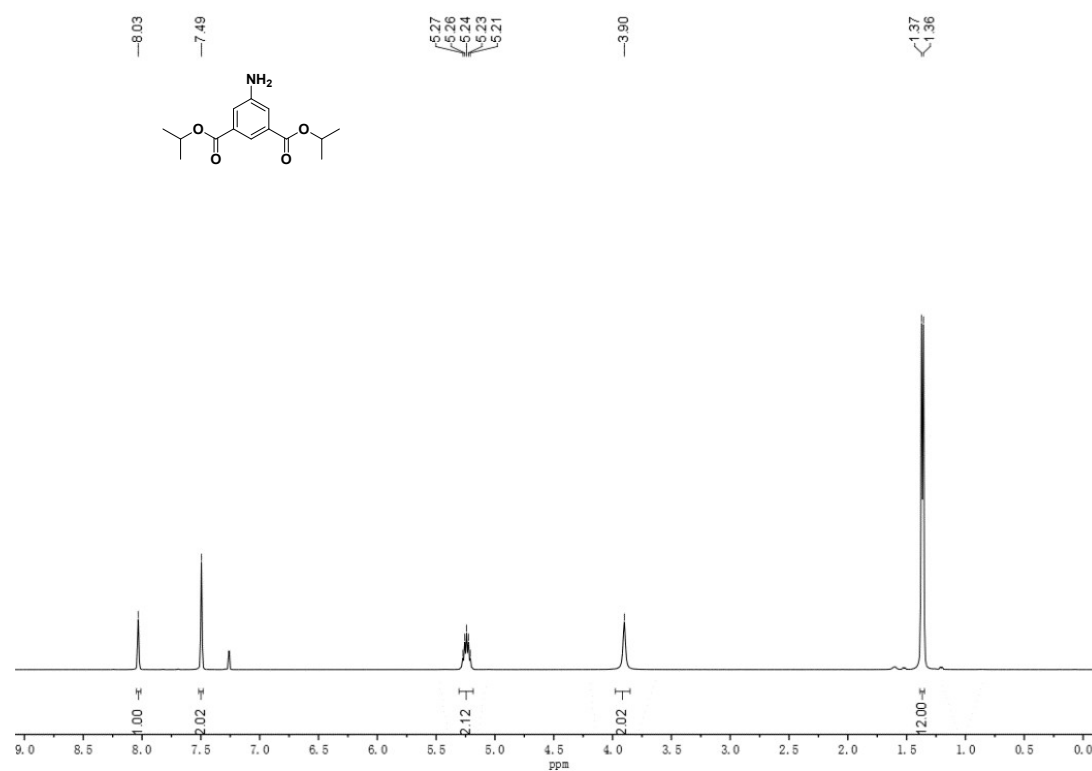

**Figure S9.** <sup>1</sup>H NMR spectrum of diisopropyl 5-aminoisophthalate (**2**).

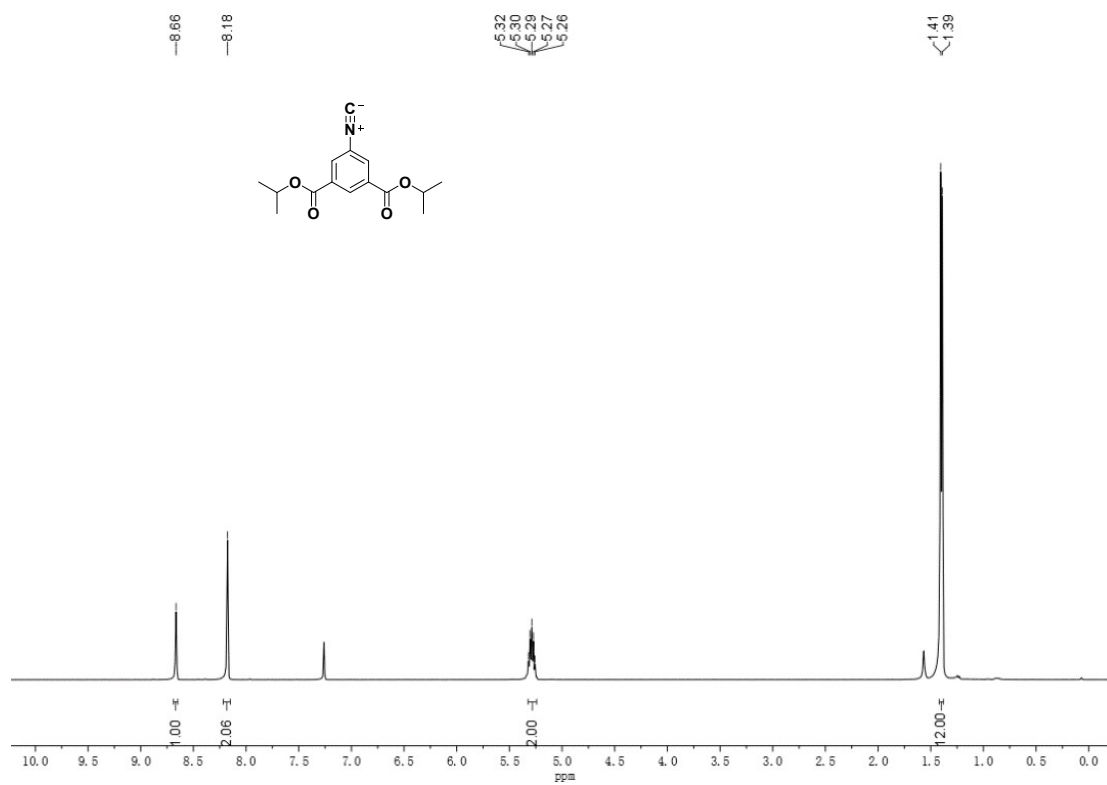

**Figure S10.** <sup>1</sup>H NMR spectrum of diisopropyl 5-isocyanoisophthalate (**2g**).

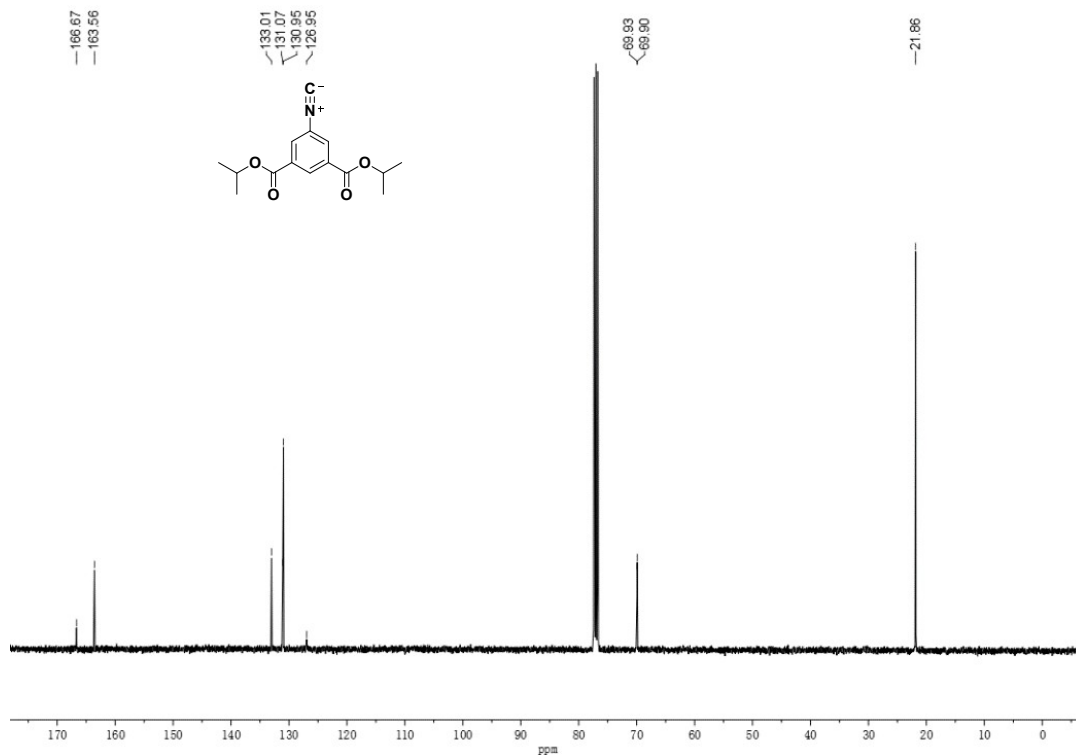

**Figure S11.**  $^{13}\text{C}$  NMR spectrum of diisopropyl 5-isocyanoisophthalate (**2g**).

**Scheme S7.** Synthesis of 4-((*2R*)-2-alanine-3-(2-methoxyethyl) carbonyl phenyl isocyanide(**D-OEGI**) and 4-((*2S*)-2-alanine-3-(2-methoxyethyl) carbonyl phenyl isocyanide (**L-OEGI**)

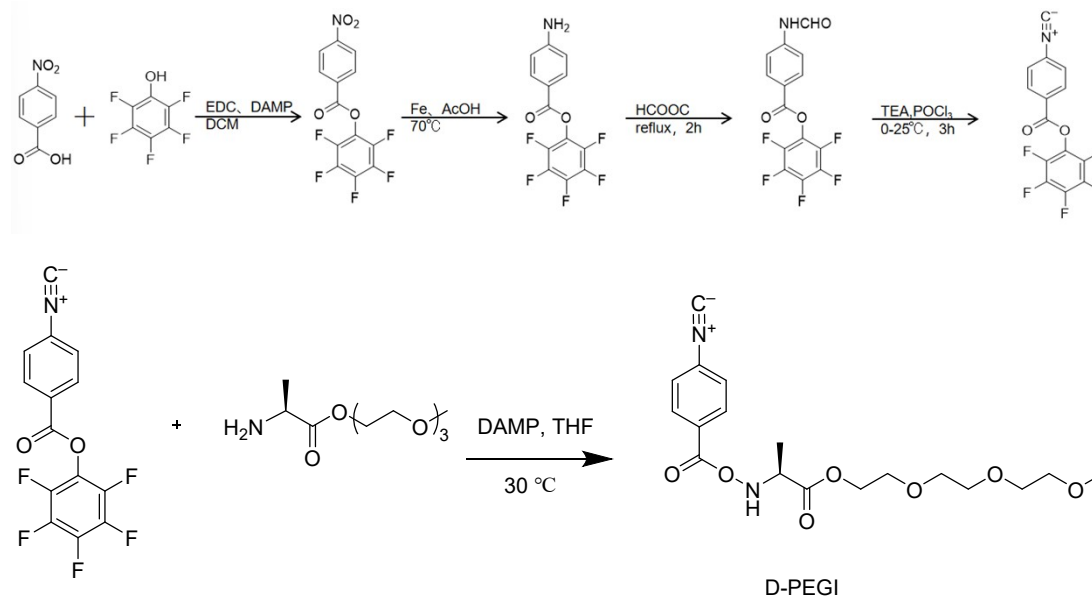

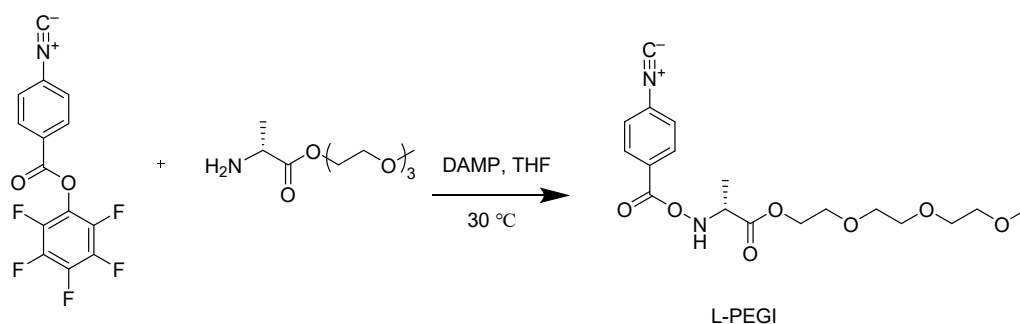

**Synthesis of 4-((2*R*)-2-alanine-3-(2-methoxyethyl) carbonyl phenyl isocyanide(D/L-OEGI) (2h/2i):** Weigh 0.3 g of the previous reaction product with a small spoon, add 1.00 g of pre-prepared PFI, then incorporate 1.00 g of EDC•HCl. Dissolve the mixture in 25 mL of DMF measured with a graduated cylinder. Set the reaction temperature to 50° C and run the reaction for 12 hours. After completion, gradually add saturated Na<sub>2</sub>CO<sub>3</sub> aqueous solution to the flask to achieve alkaline pH. Perform DCM extraction first, followed by washing with saturated saline solution. Dry the residue with anhydrous sodium sulfate and filter. Remove the solvent by rotary evaporation. The remaining compound is isolated via column chromatography to yield D-PEGI (yield 84%). <sup>1</sup>H NMR(400 MHz,CDCl<sub>3</sub>): δ 7.87(d, J=8.3 Hz, 2H),7.45(d, J=8.3 Hz, 2H),7.00(d, J=7.4 Hz, 1H), 4.83(q, J=7.2 Hz, 1H),4.34 (s, 2H),4.12 (q, J=7.1 Hz, 1H),3.75-3.71 (m,2H),3.64 (d, J=5.8 Hz, 6H), 3.58-3.52(m, 2H),3.36 (s, 3H), 2.04 (s, 1H),1.54 (d, J=7.1 Hz, 3H) .

**A typical procedure for the polymerization of 2a (EPI) by neutral chiral (*S,S*)-bis(oxazoline) palladium complexes 1a/PPh<sub>3</sub> (Table 1, entry 1):**

Under air atmosphere, a 25 mL round bottom flask was charged with a solution of complexe **1a** (5.3 mg, 8 μmol) in toluene (1 mL), then PPh<sub>3</sub> (52.5 mg, 0.2 μmol) was added, the resulting mixture was stirred at room temperature for 1 min, then added to a solution of **2a** (70 mg, 0.4 mmol) in toluene (2 mL). The reaction mixture was stirred at 90 °C for 2 hours, then the reaction mixture was poured into petroleum ether (10 mL) to precipitate the polymer product, the gray polymer solid was collected by filtration, and dried in vacuo at 40 °C to a constant weight (70 mg, 100% yield), The product obtained is soluble thoroughly in CHCl<sub>3</sub> at 25 °C.

**A typical procedure for the polymerization of 2a (EPI) by neutral chiral (*S,S*)-bis(oxazoline) palladium complexes 1a (Table 1, entry 5):**

Under air atmosphere, a 25 mL round bottom flask was charged with a solution of complexe **1a** (5.3 mg, 8 μmol) in toluene (1 mL), then added to a solution of **2a** (70 mg, 0.4 mmol) in toluene (1 mL). The reaction mixture was stirred at 110 °C for 24 hours, then the reaction mixture was poured into petroleum ether (10 mL) to precipitate the polymer product, the gray polymer solid was collected by filtration, and dried in vacuo at 40 °C to a constant weight (40 mg, 57% yield), The product obtained is soluble thoroughly in CHCl<sub>3</sub> at 25 °C.

**A typical procedure for the copolymerization of (*1S,2R,5S*)-2-isopropyl-5-methylcyclohexyl 4-isocyanobenzoate (D-IMCI) with 4-isociano-4'-(1,2,2-triphenylvinyl)-1,1'-biphenyl (ITPB) (Table 3, entry 3):**

Under air atmosphere, a 50 mL round bottom flask was charged with a solution of complexe **1b**

(2.62 mg, 4.6  $\mu\text{mol}$ ) in toluene (2 mL), then  $\text{PPh}_3$  (30 mg, 120  $\mu\text{mol}$ ) was added, the resulting mixture was stirred at 25  $^\circ\text{C}$  for 3 min, then a solution of (*IS,2R,5S*)-2-isopropyl-5-methylcyclohexyl 4-isocyanobenzoate (66 mg, 0.23 mmol) and 4-isociano-4'-(1,2,2-triphenylvinyl)-1,1'-biphenyl (100 mg, 0.23 mmol) in toluene (3 mL) was added, the reaction mixture was stirred at 90  $^\circ\text{C}$  for 3 min, then the reaction mixture was poured into methanol (100 mL) to precipitate the copolymer product, the orange copolymer solid was collected by filtration, and dried in vacuo at 40  $^\circ\text{C}$  to a constant weight (143 mg, 86% yield), The product obtained is soluble thoroughly in  $\text{CHCl}_3$  and THF at 25  $^\circ\text{C}$ .

**A typical procedure for the copolymerization of (*IS,2R,5S*)-2-isopropyl-5-methylcyclohexyl 4-isocyanobenzoate (D-IMCI) with isopropyl 3-isocyanobenzoate (IPI) (Table 4, entry 3):**

Under air atmosphere, a 50 mL round bottom flask was charged with a solution of complex **1b** (2.6 mg, 4.6  $\mu\text{mol}$ ) in toluene (2 mL), then  $\text{PPh}_3$  (30 mg, 120  $\mu\text{mol}$ ) was added, the resulting mixture was stirred at 25  $^\circ\text{C}$  for 3 min, then a solution of (*IS,2R,5S*)-2-isopropyl-5-methylcyclohexyl 4-isocyanobenzoate (66 mg, 0.23 mmol) and isopropyl 3-isocyanobenzoate (44 mg, 0.23 mmol) in toluene (3 mL) was added, the reaction mixture was stirred at 25  $^\circ\text{C}$  for 3 min, then the reaction mixture was poured into methanol (100 mL) to precipitate the copolymer product, the orange copolymer solid was collected by filtration, and dried in vacuo at 40  $^\circ\text{C}$  to a constant weight (76 mg, 69% yield), The product obtained is soluble thoroughly in  $\text{CHCl}_3$  and THF at 25  $^\circ\text{C}$ .

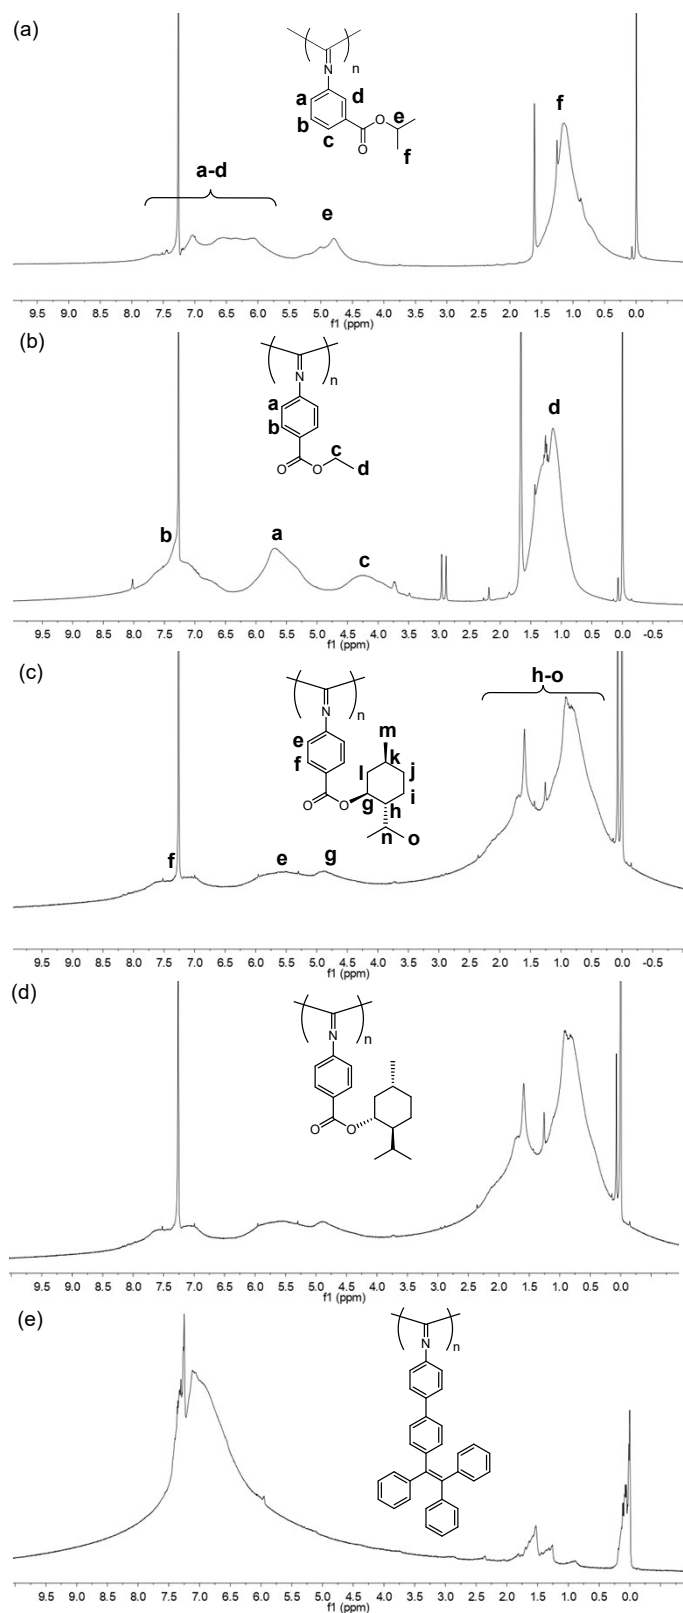

**Figure S12.**  $^1\text{H}$  NMR spectrum of polymers (a) poly(IPI) (Table 2, entry 23), (b) poly(EPI) (Table 2, entry 13), (c) poly(D-IMCI) (Table 2, entry 21), (d) poly(L-IMCI) (Table 2, entry 22), (e) poly(ITPB) (Table 1, entry 18) in  $\text{CDCl}_3$  at 25  $^\circ\text{C}$ .

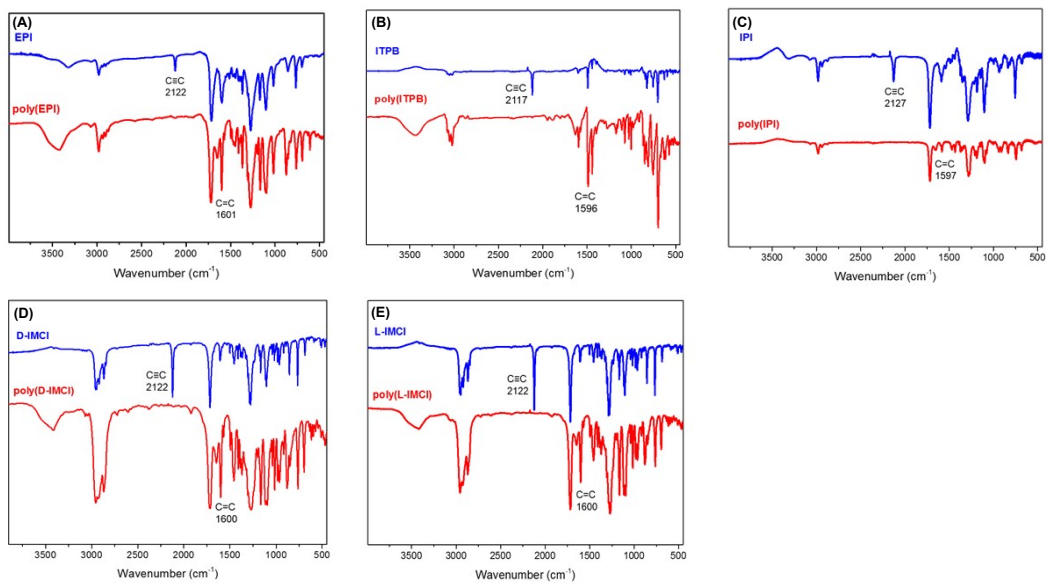

**Figure S13.** FT-IR spectra of polymers (A) EPI and poly(EPI), (B) ITPB and poly(ITPB), (C) poly(IPI), (D) poly(D-IMCI) and (E) poly(L-IMCI).

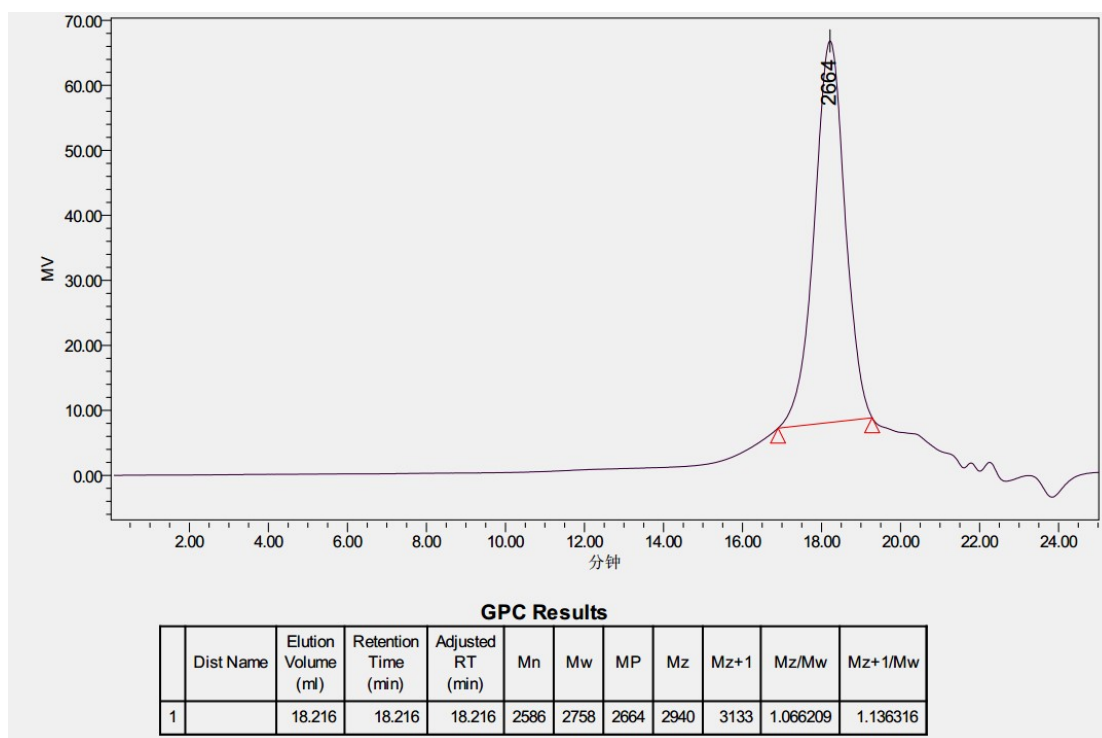

**Figure S14.** GPC curve of polyEPI obtained by complex **1a** in Table 1, entry 1.

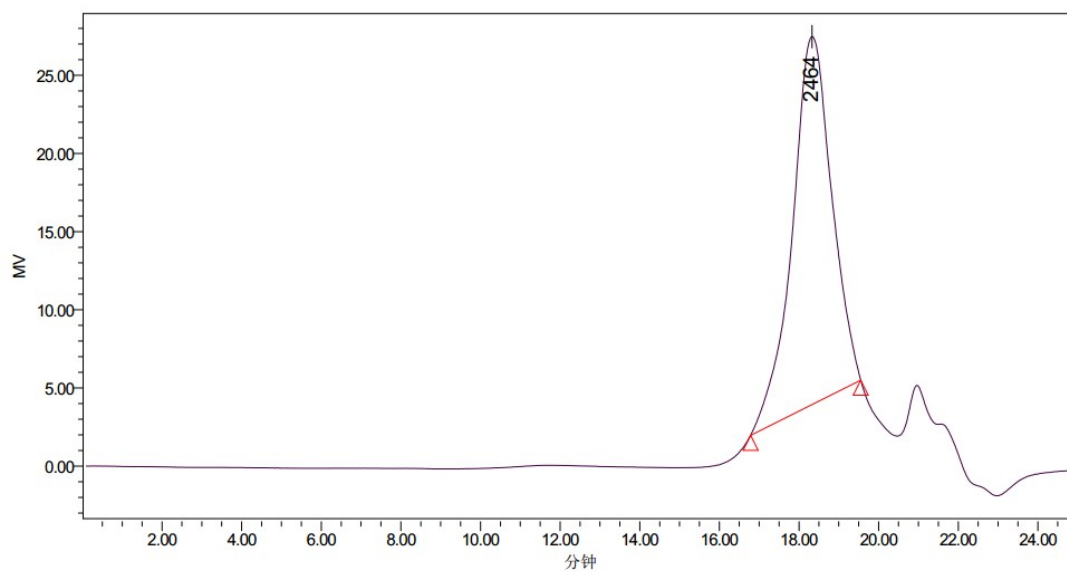

**GPC Results**

| Dist Name | Elution Volume (ml) | Retention Time (min) | Adjusted RT (min) | Mn   | Mw   | MP   | Mz   | Mz+1 | Mz/Mw    | Mz+1/Mw  |
|-----------|---------------------|----------------------|-------------------|------|------|------|------|------|----------|----------|
| 1         | 18.330              | 18.330               | 18.330            | 2325 | 2595 | 2464 | 2895 | 3220 | 1.115553 | 1.240964 |

**Figure S15.** GPC curve of polyEPI obtained by complex **1b** in Table 1, entry 2.

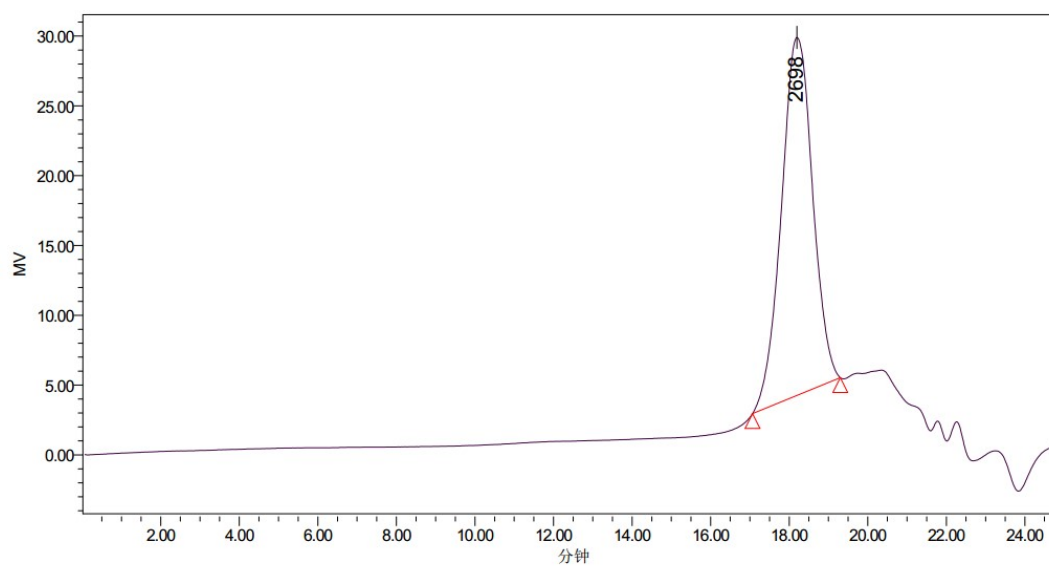

**GPC Results**

| Dist Name | Elution Volume (ml) | Retention Time (min) | Adjusted RT (min) | Mn   | Mw   | MP   | Mz   | Mz+1 | Mz/Mw    | Mz+1/Mw  |
|-----------|---------------------|----------------------|-------------------|------|------|------|------|------|----------|----------|
| 1         | 18.198              | 18.198               | 18.198            | 2593 | 2758 | 2698 | 2928 | 3100 | 1.061521 | 1.123933 |

**Figure S16.** GPC curve of polyEPI obtained by complex **1c** in Table 1, entry 3.

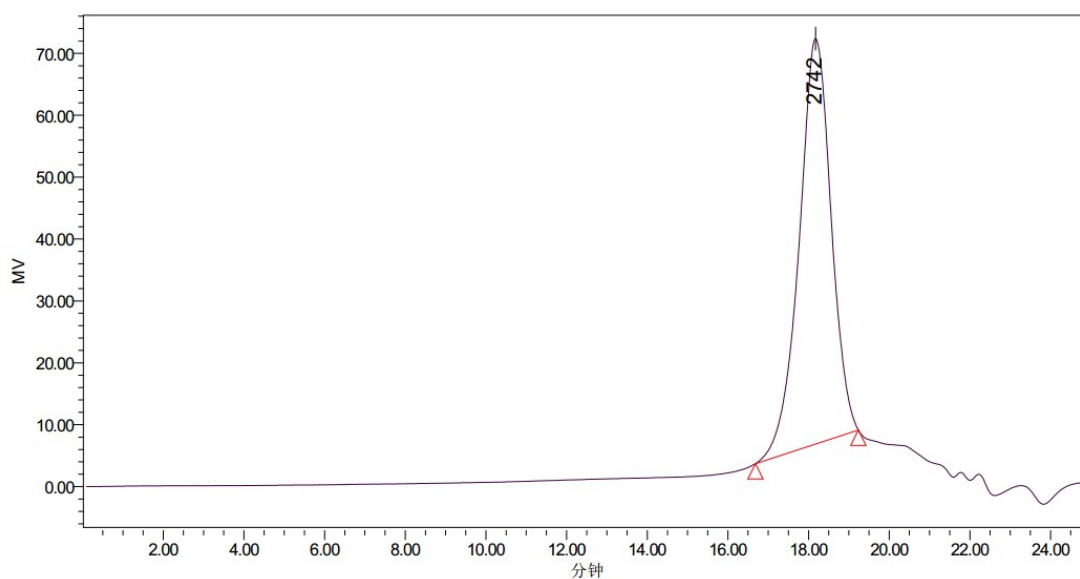

**GPC Results**

|   | Dist Name | Elution Volume (ml) | Retention Time (min) | Adjusted RT (min) | Mn   | Mw   | MP   | Mz   | Mz+1 | Mz/Mw    | Mz+1/Mw  |
|---|-----------|---------------------|----------------------|-------------------|------|------|------|------|------|----------|----------|
| 1 |           | 18.174              | 18.174               | 18.174            | 2676 | 2861 | 2742 | 3062 | 3282 | 1.070471 | 1.147159 |

**Figure S17.** GPC curve of polyEPI obtained by complex **1d** in Table 1, entry 4.

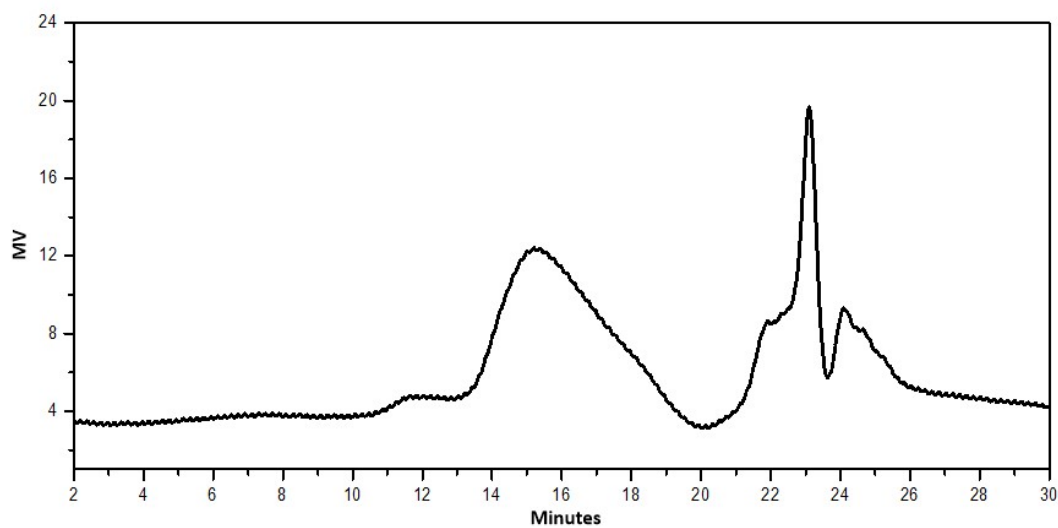

**Broad Unknown Relative Peak Table**

|   | Distribution Name | Mn (Daltons) | Mw (Daltons) | Mp (Daltons) | Mz (Daltons) | polydispersity | Mz/Mw   |
|---|-------------------|--------------|--------------|--------------|--------------|----------------|---------|
| 1 |                   | 151136       | 581647       | 587830       | 1304603      | 3.84850        | 2.24294 |

**Figure S18.** GPC curve of polyEPI obtained by complex **1a**/PPh<sub>3</sub> in Table 1, entry 5.

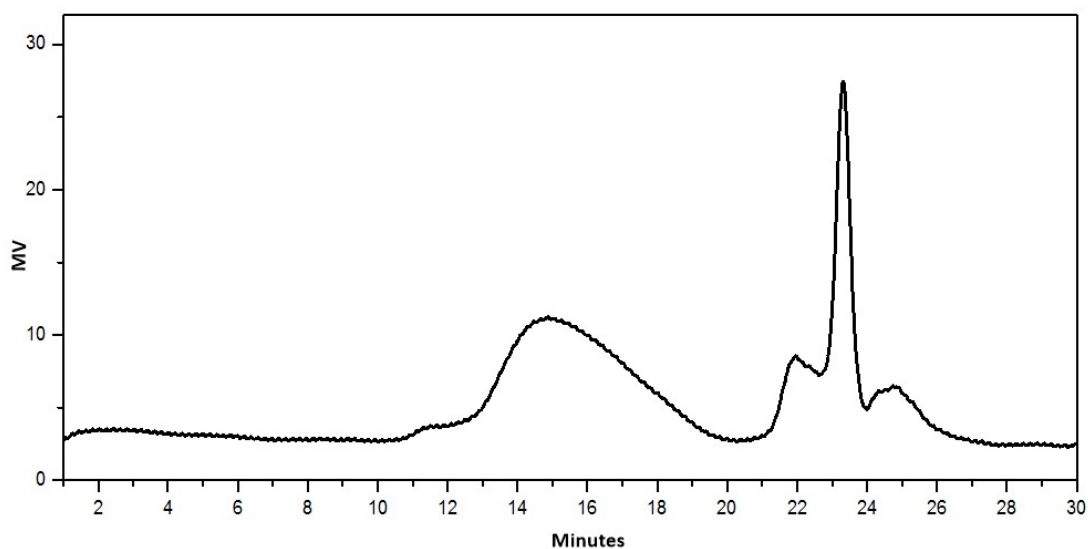

**Broad Unknown Relative Peak Table**

| Distribution Name | Mn (Daltons) | Mw (Daltons) | Mp (Daltons) | Mz (Daltons) | polydispersity | Mz/Mw   |
|-------------------|--------------|--------------|--------------|--------------|----------------|---------|
| 1                 | 138275       | 523896       | 530124       | 1158983      | 3.78879        | 2.18625 |

**Figure S19.** GPC curve of polyEPI obtained by complex **1d**/ $\text{PPh}_3$  in Table 1, entry 6.

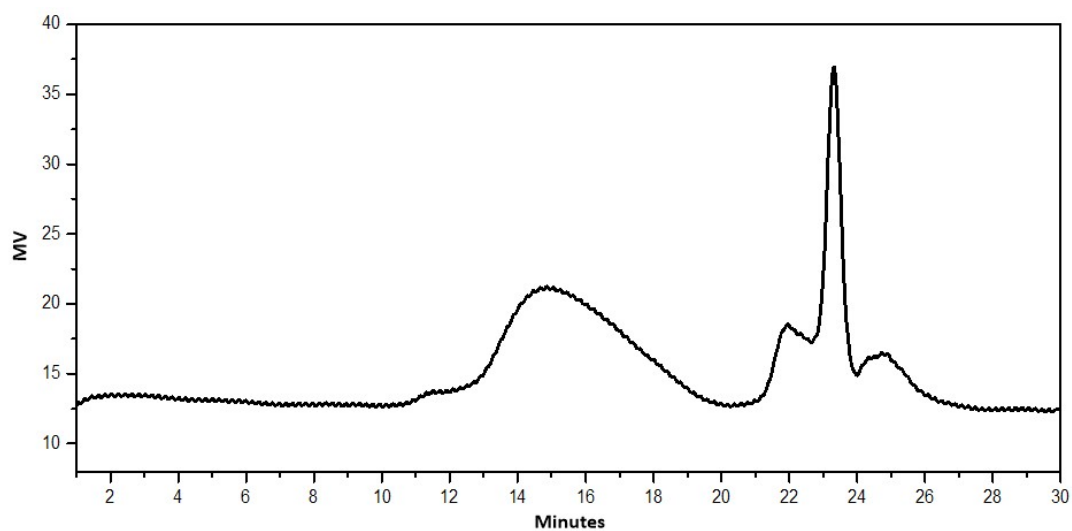

**Broad Unknown Relative Peak Table**

| Distribution Name | Mn (Daltons) | Mw (Daltons) | Mp (Daltons) | Mz (Daltons) | polydispersity | Mz/Mw   |
|-------------------|--------------|--------------|--------------|--------------|----------------|---------|
| 1                 | 118118       | 333671       | 409251       | 599850       | 2.82489        | 1.79772 |

**Figure S20.** GPC curve of polyEPI obtained by complex **1c**/ $\text{PPh}_3$  in Table 1, entry 7.

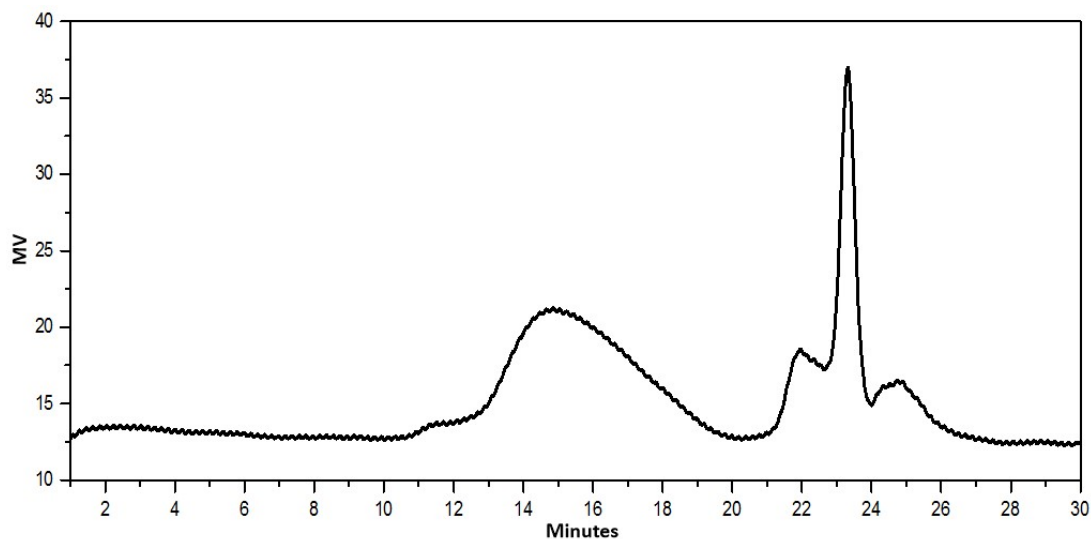

**Broad Unknown Relative Peak Table**

| Distribution Name | Mn (Daltons) | Mw (Daltons) | Mp (Daltons) | Mz (Daltons) | polydispersity | Mz/Mw   |
|-------------------|--------------|--------------|--------------|--------------|----------------|---------|
| 1                 | 224634       | 988557       | 985229       | 2519057      | 4.40075        | 2.54822 |

**Figure S21.** GPC curve of polyEPI obtained by complex **1b**/ $\text{PPh}_3$  in Table 1, entry 8.

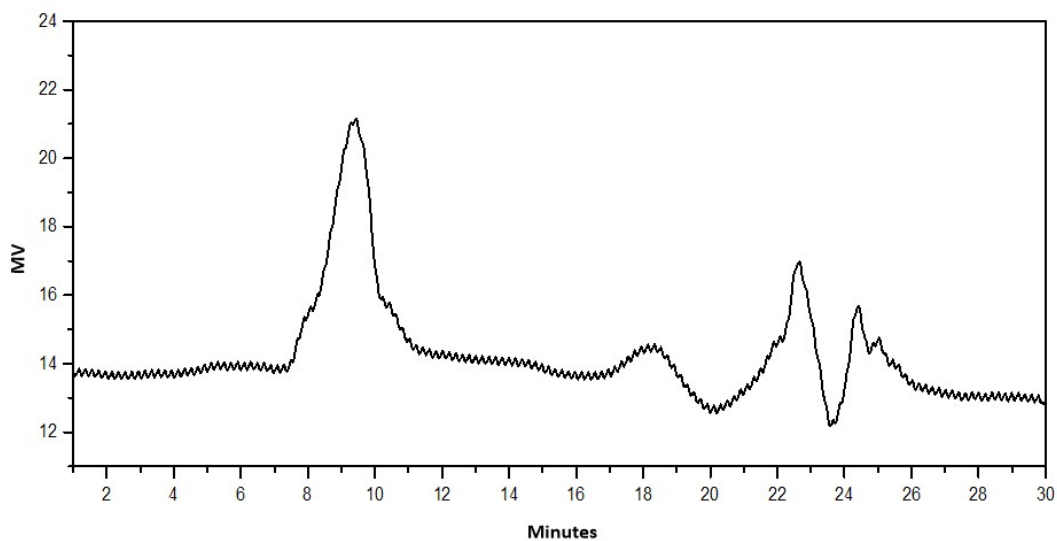

**Broad Unknown Relative Peak Table**

| Distribution Name | Mn (Daltons) | Mw (Daltons) | Mp (Daltons) | Mz (Daltons) | polydispersity | Mz/Mw   |
|-------------------|--------------|--------------|--------------|--------------|----------------|---------|
| 1                 | 22986        | 36099        | 32549        | 49321        | 1.57048        | 1.51528 |

**Figure S22.** GPC curve of polyEPI obtained by complex **1d**/ $\text{PPh}_3$  in Table 1, entry 9.

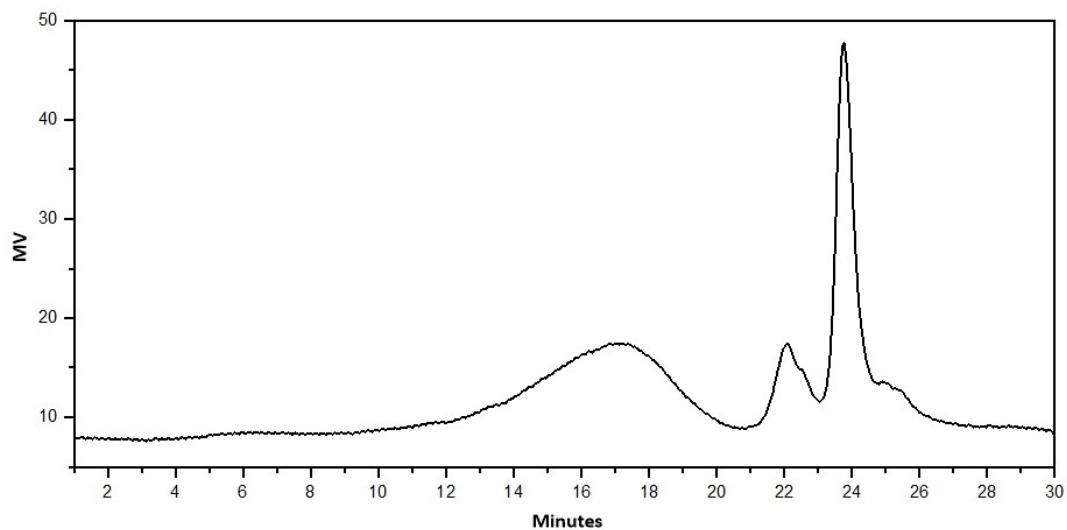

**Broad Unknown Relative Peak Table**

| Distribution Name | Mn (Daltons) | Mw (Daltons) | Mp (Daltons) | Mz (Daltons) | polydispersity | Mz/Mw   |
|-------------------|--------------|--------------|--------------|--------------|----------------|---------|
| 1                 | 84902        | 245269       | 83605        | 606883       | 2.88884        | 7.25893 |

**Figure S23.** GPC curve of polyEPI obtained by complex **1d**/PPh<sub>3</sub> in Table 1, entry 10.

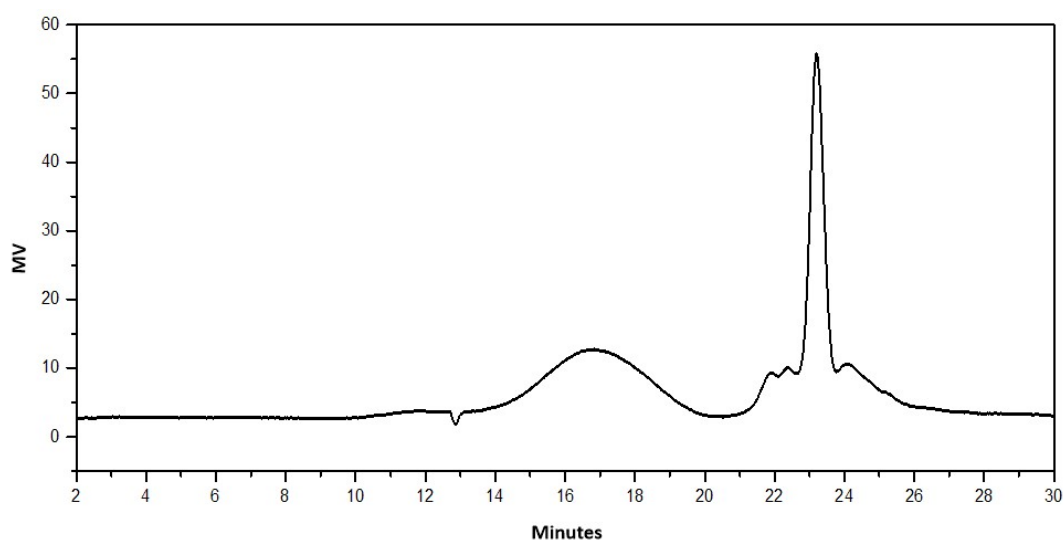

**Broad Unknown Relative Peak Table**

| Distribution Name | Mn (Daltons) | Mw (Daltons) | Mp (Daltons) | Mz (Daltons) | polydispersity | Mz/Mw   |
|-------------------|--------------|--------------|--------------|--------------|----------------|---------|
| 1                 | 81353        | 221894       | 160057       | 502773       | 2.72754        | 3.14121 |

**Figure S24.** GPC curve of polyEPI obtained by complex **1d**/PPh<sub>3</sub> in Table 1, entry 13.

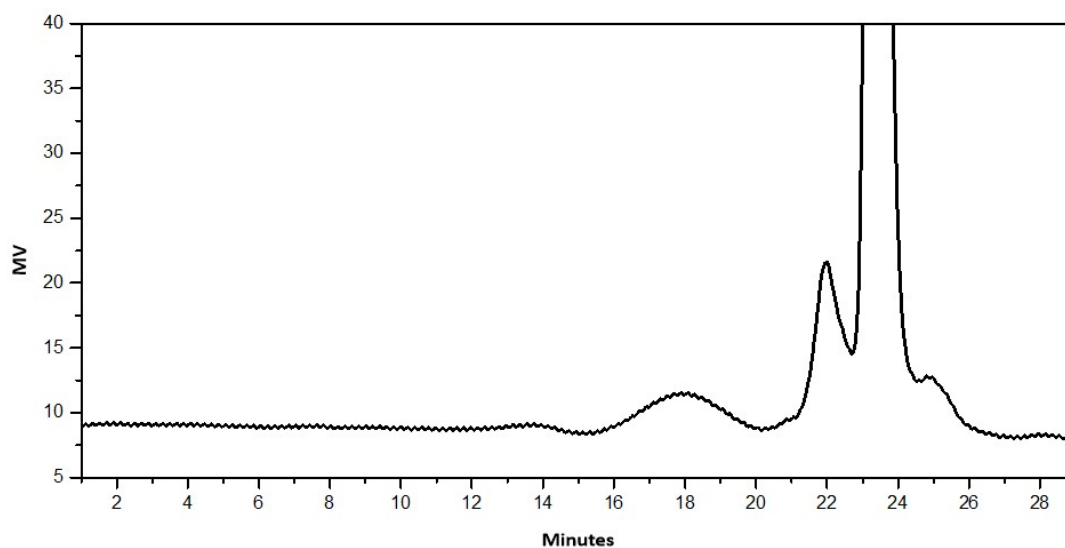

**Broad Unknown Relative Peak Table**

| Distribution Name | Mn (Daltons) | Mw (Daltons) | Mp (Daltons) | Mz (Daltons) | polydispersity | Mz/Mw   |
|-------------------|--------------|--------------|--------------|--------------|----------------|---------|
| 1                 | 35111        | 64946        | 49062        | 104182       | 1.84973        | 2.12347 |

**Figure S25.** GPC curve of polyEPI obtained by complex **1d**/PPh<sub>3</sub> in Table 1, entry 14.

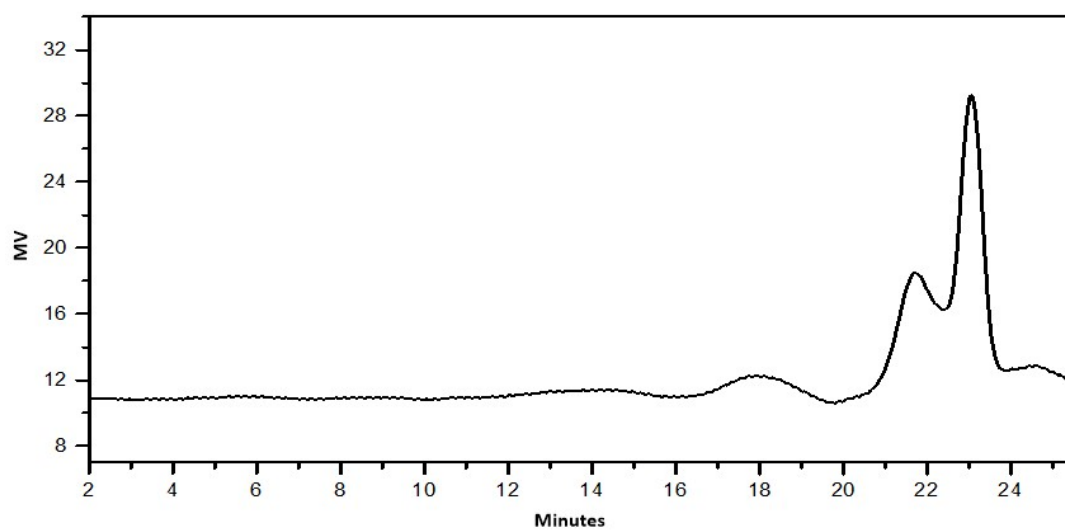

**Broad Unknown Relative Peak Table**

| Distribution Name | Mn (Daltons) | Mw (Daltons) | Mp (Daltons) | Mz (Daltons) | polydispersity | Mz/Mw   |
|-------------------|--------------|--------------|--------------|--------------|----------------|---------|
| 1                 | 32411        | 52132        | 51839        | 74132        | 1.60846        | 1.43004 |

**Figure S26.** GPC curve of polyEPI obtained by complex **1d**/PPh<sub>3</sub> in Table 1, entry 15.

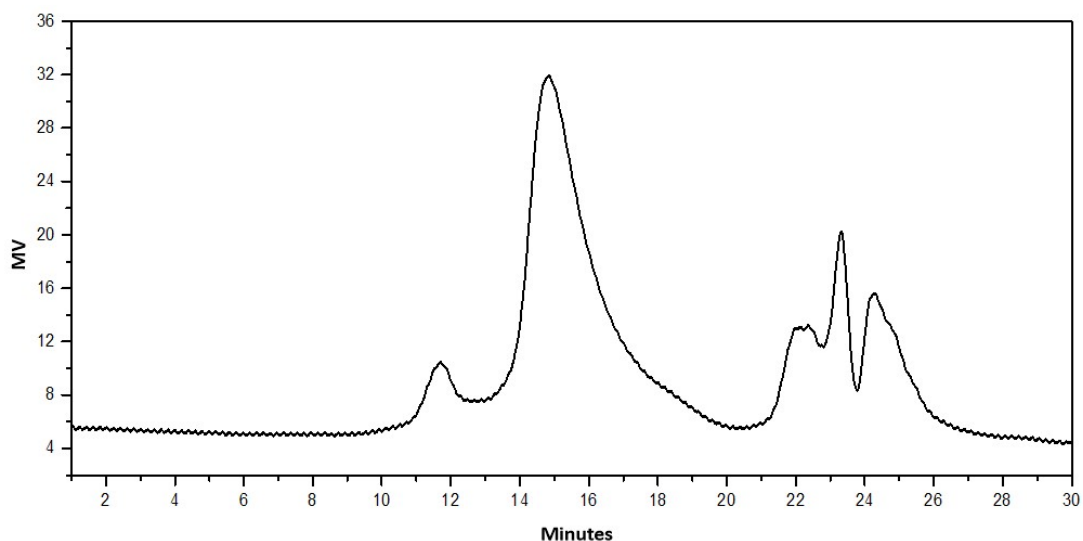

**Broad Unknown Relative Peak Table**

| Distribution Name | Mn (Daltons) | Mw (Daltons) | Mp (Daltons) | Mz (Daltons) | polydispersity | Mz/Mw   |
|-------------------|--------------|--------------|--------------|--------------|----------------|---------|
| 1                 | 333969       | 769612       | 979985       | 1191032      | 2.30444        | 1.21535 |

**Figure S27.** GPC curve of polyEPI obtained by complex **1d**/PPh<sub>3</sub> in Table 1, entry 17.

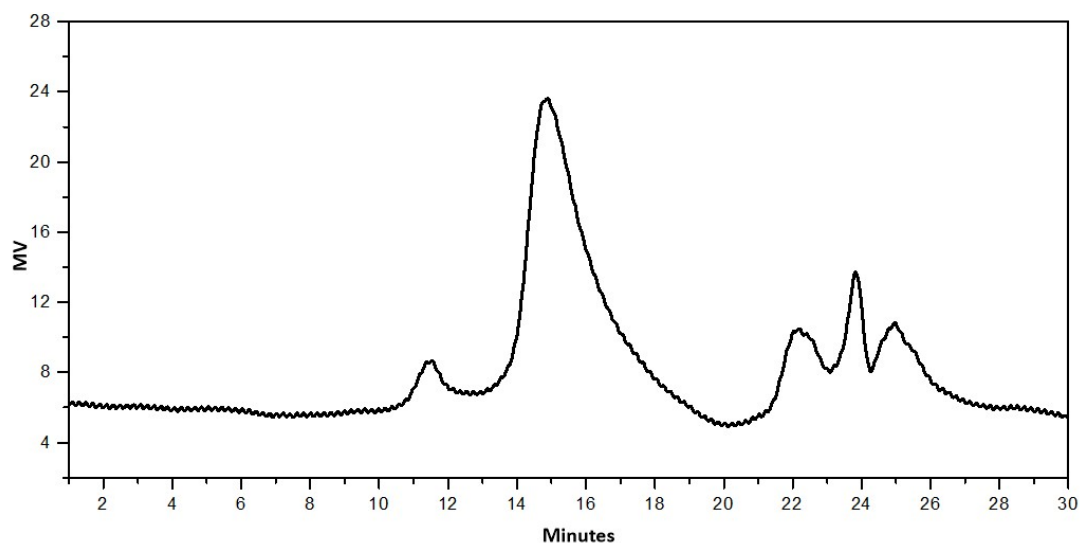

**Broad Unknown Relative Peak Table**

| Distribution Name | Mn (Daltons) | Mw (Daltons) | Mp (Daltons) | Mz (Daltons) | polydispersity | Mz/Mw   |
|-------------------|--------------|--------------|--------------|--------------|----------------|---------|
| 1                 | 417451       | 745004       | 952132       | 1069770      | 1.78465        | 1.12355 |

**Figure S28.** GPC curve of polyEPI obtained by complex **1d**/PPh<sub>3</sub> in Table 1, entry 18.

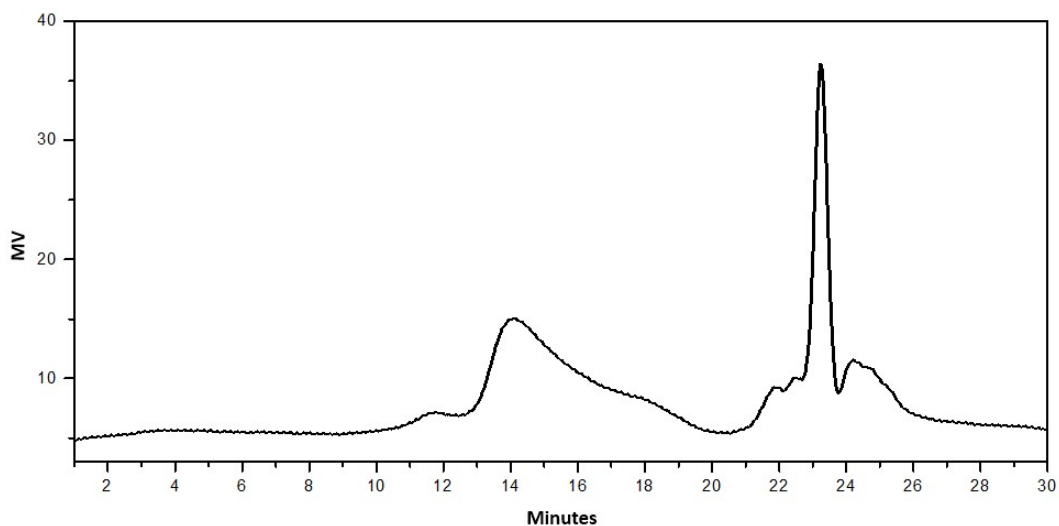

**Broad Unknown Relative Peak Table**

| Distribution Name | Mn (Daltons) | Mw (Daltons) | Mp (Daltons) | Mz (Daltons) | polydispersity | Mz/Mw   |
|-------------------|--------------|--------------|--------------|--------------|----------------|---------|
| 1                 | 474808       | 1523665      | 2160805      | 2700017      | 3.20901        | 1.24954 |

**Figure S29.** GPC curve of polyEPI obtained by complex **1d**/PPh<sub>3</sub> in Table 1, entry 19.

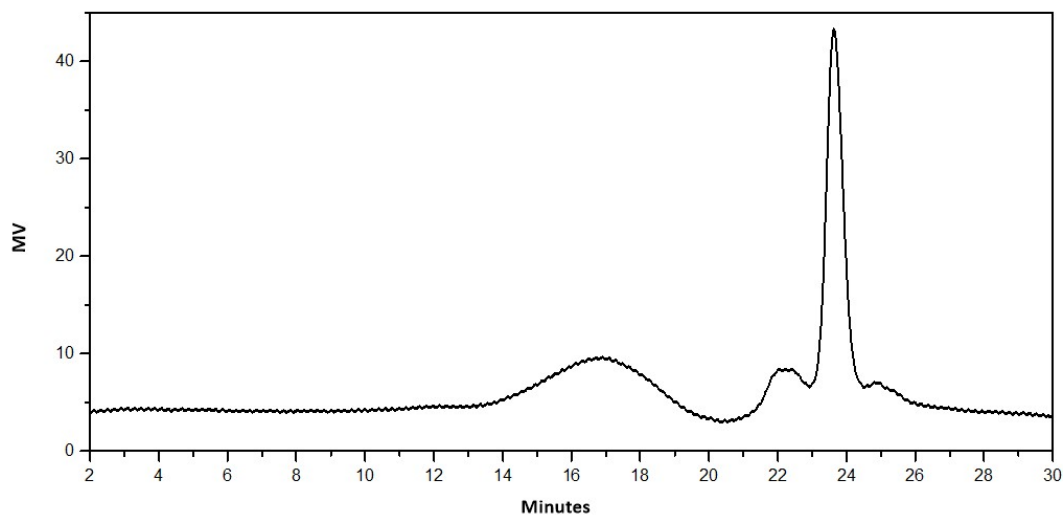

**Broad Unknown Relative Peak Table**

| Distribution Name | Mn (Daltons) | Mw (Daltons) | Mp (Daltons) | Mz (Daltons) | polydispersity | Mz/Mw   |
|-------------------|--------------|--------------|--------------|--------------|----------------|---------|
| 1                 | 87232        | 250638       | 142692       | 618658       | 2.87323        | 4.33561 |

**Figure S30.** GPC curve of polyEPI obtained by complex **1d**/PPh<sub>3</sub> in Table 1, entry 20.

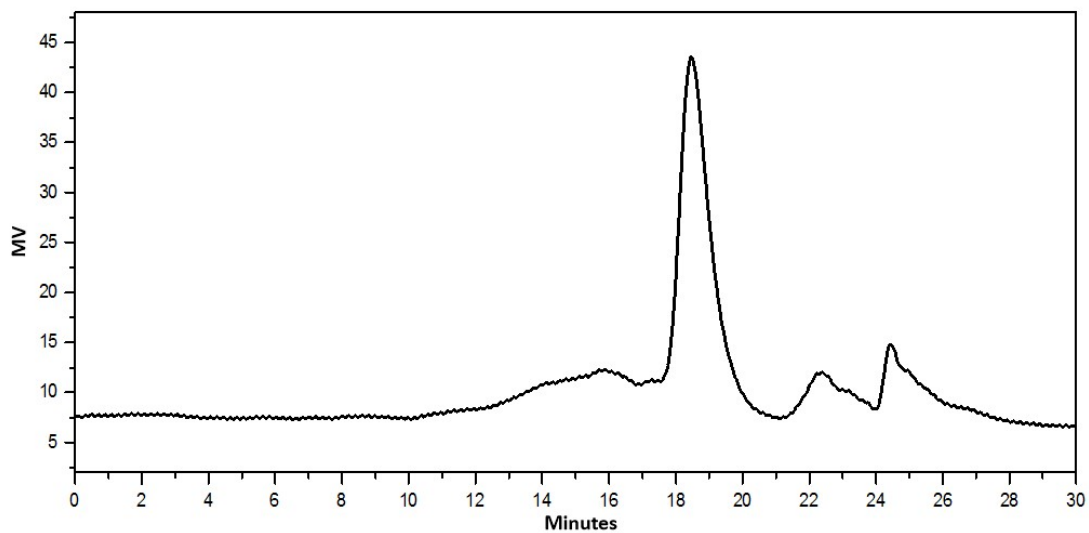

**Broad Unknown Relative Peak Table**

| Distributionn<br>Name | Mn<br>(Daltons) | Mw<br>(Daltons) | Mp<br>(Daltons) | Mz<br>(Daltons) | polydispersity | Mz/Mw   |
|-----------------------|-----------------|-----------------|-----------------|-----------------|----------------|---------|
| 1                     | 17801           | 27636           | 30598           | 34781           | 1.55249        | 1.13671 |

**Figure S31.** GPC curve of polyEPI obtained by complex **1d**/PEt<sub>3</sub> in Table 1, entry 22.

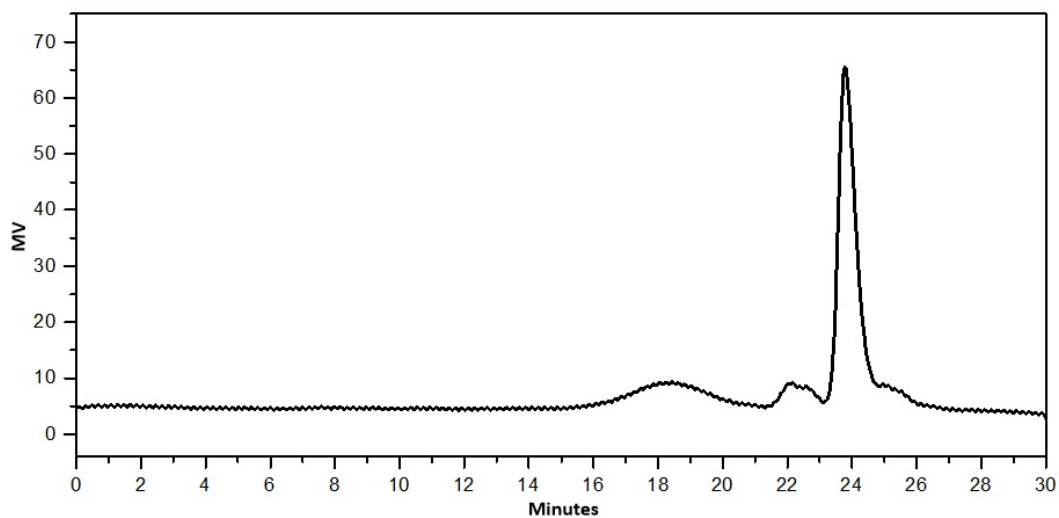

**Broad Unknown Relative Peak Table**

| Distributionn<br>Name | Mn<br>(Daltons) | Mw<br>(Daltons) | Mp<br>(Daltons) | Mz<br>(Daltons) | polydispersity | Mz/Mw   |
|-----------------------|-----------------|-----------------|-----------------|-----------------|----------------|---------|
| 1                     | 24969           | 53516           | 32039           | 102551          | 2.14329        | 3.20081 |

**Figure S32.** GPC curve of polyEPI obtained by complex **1d**/P(*n*-Bu)<sub>3</sub> in Table 1, entry 23.

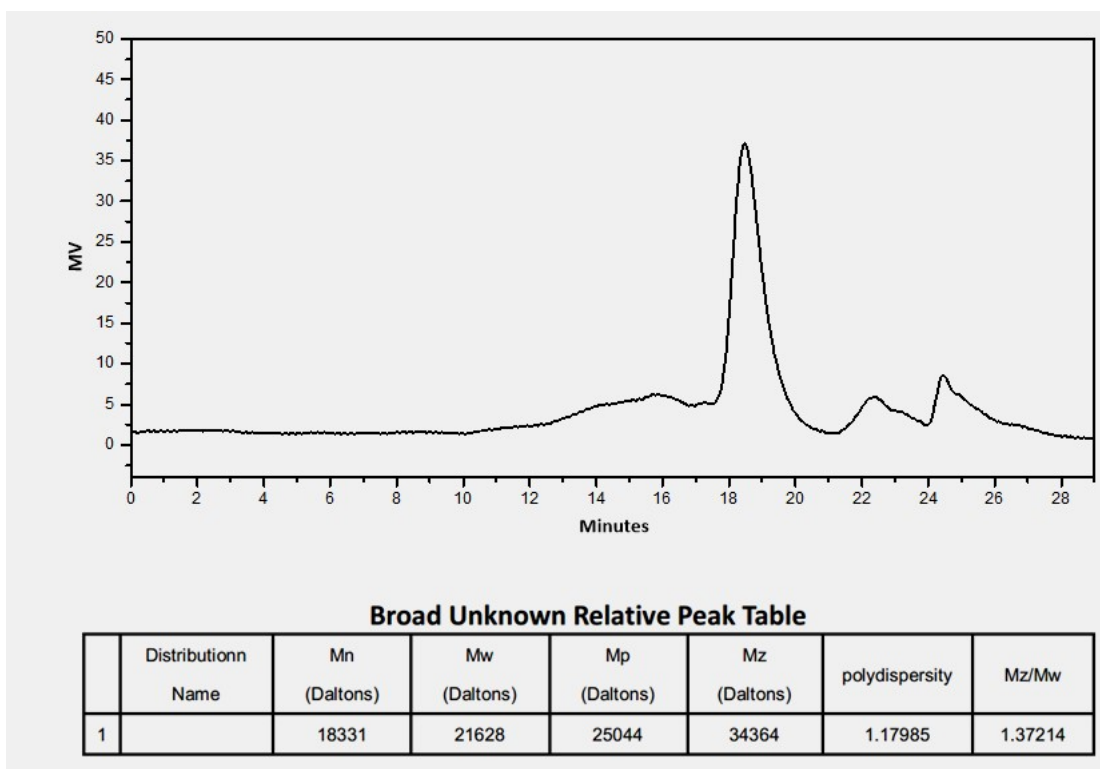

**Figure S33.** GPC curve of polyEPI obtained by complex **1d**/ $P(n\text{-Oct})_3$  in Table 1, entry 24.

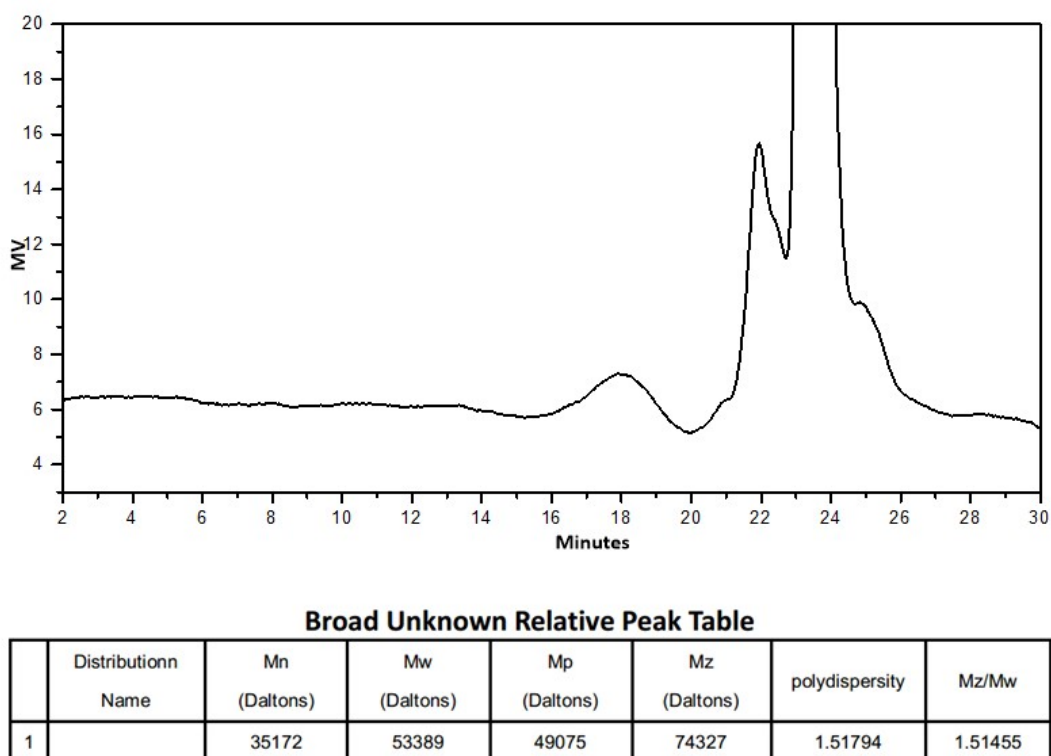

**Figure S34.** GPC curve of polyEPI obtained by complex **1d**/ $P(C_6H_{11})_3$  in Table 1, entry 25.

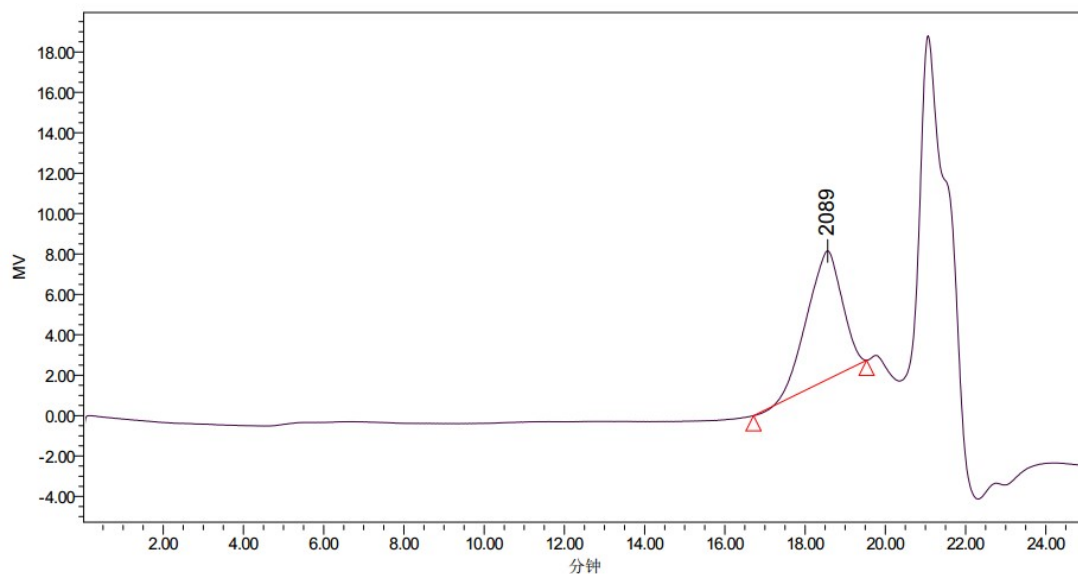

**GPC Results**

| Dist Name | Elution Volume (ml) | Retention Time (min) | Adjusted RT (min) | Mn   | Mw   | MP   | Mz   | Mz+1 | Mz/Mw    | Mz+1/Mw  |
|-----------|---------------------|----------------------|-------------------|------|------|------|------|------|----------|----------|
| 1         | 18.563              | 18.563               | 18.563            | 2154 | 2337 | 2089 | 2535 | 2741 | 1.084663 | 1.172779 |

**Figure S35.** GPC curve of polyNI obtained by complex **1d**/PPh<sub>3</sub> in Table 1, entry 26.

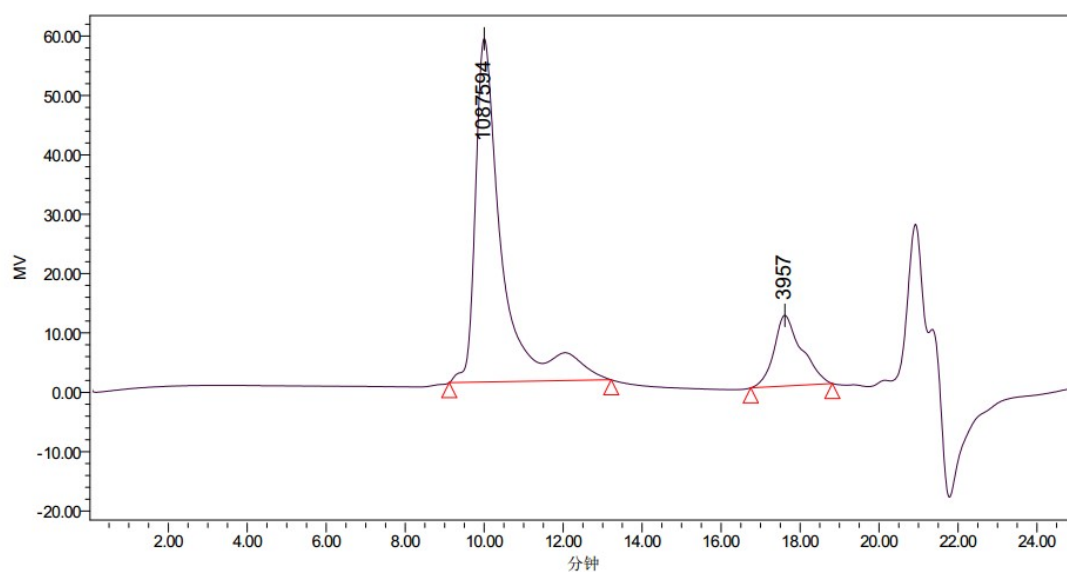

**GPC Results**

| Dist Name | Elution Volume (ml) | Retention Time (min) | Adjusted RT (min) | Mn     | Mw     | MP      | Mz      | Mz+1    | Mz/Mw    |
|-----------|---------------------|----------------------|-------------------|--------|--------|---------|---------|---------|----------|
| 1         | 10.003              | 10.003               | 10.003            | 504967 | 886382 | 1087594 | 1114594 | 1286415 | 1.257469 |
| 2         | 17.614              | 17.614               | 17.614            | 3527   | 3719   | 3957    | 3902    | 4074    | 1.049230 |

**Figure S36.** GPC curve of polyITPB obtained by complex **1d**/PPh<sub>3</sub> in Table 1, entry 27.

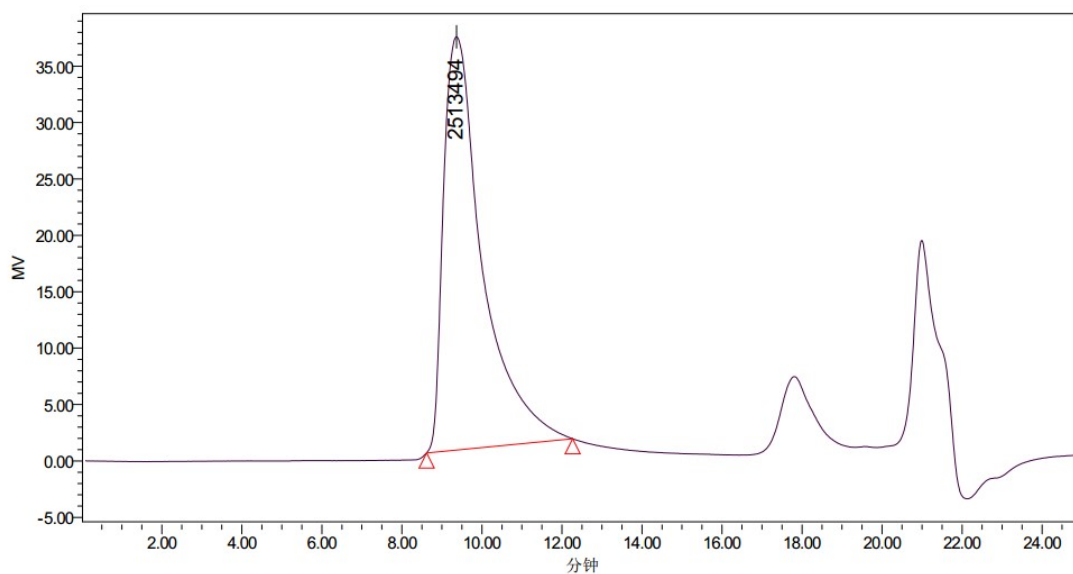

GPC Results

| Dist Name | Elution Volume (ml) | Retention Time (min) | Adjusted RT (min) | Mn      | Mw      | MP      | Mz      | Mz+1    | Mz/Mw    |
|-----------|---------------------|----------------------|-------------------|---------|---------|---------|---------|---------|----------|
| 1         | 9.366               | 9.366                | 9.366             | 1164795 | 2035664 | 2513494 | 2738514 | 3261706 | 1.345268 |

Figure S37. GPC curve of poly(D-IMCI) obtained by complex **1d**/PPh<sub>3</sub> in Table 1, entry 28.

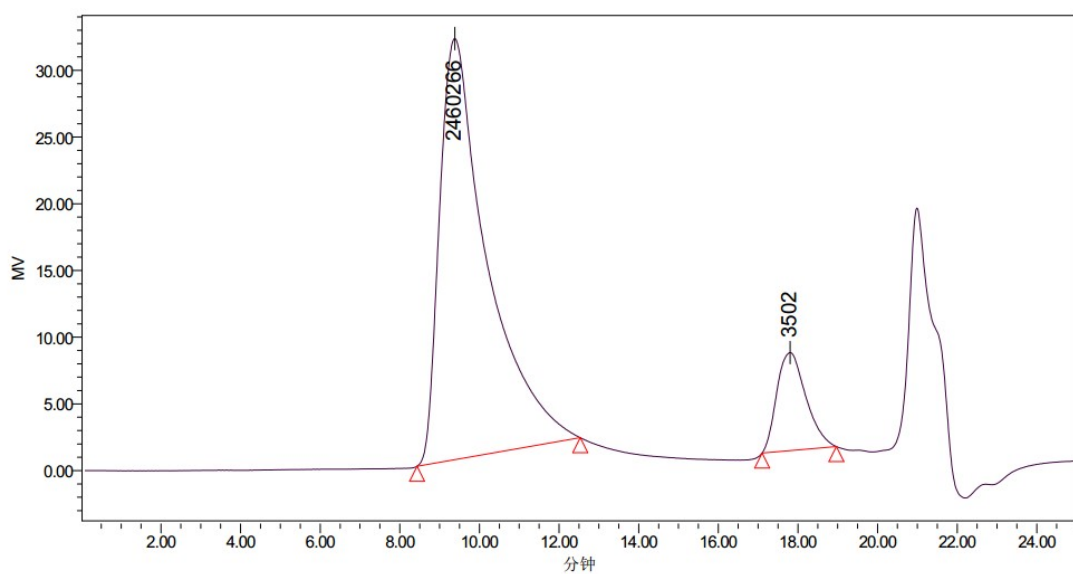

GPC Results

| Dist Name | Elution Volume (ml) | Retention Time (min) | Adjusted RT (min) | Mn     | Mw      | MP      | Mz      | Mz+1    | Mz/Mw    |
|-----------|---------------------|----------------------|-------------------|--------|---------|---------|---------|---------|----------|
| 1         | 9.381               | 9.381                | 9.381             | 929102 | 1960435 | 2460266 | 2961678 | 3763994 | 1.510725 |
| 2         | 17.805              | 17.805               | 17.805            | 3244   | 3405    | 3502    | 3554    | 3690    | 1.043686 |

Figure S38. GPC curve of poly(L-IMCI) obtained by complex **1d**/PPh<sub>3</sub> in Table 1, entry 29.

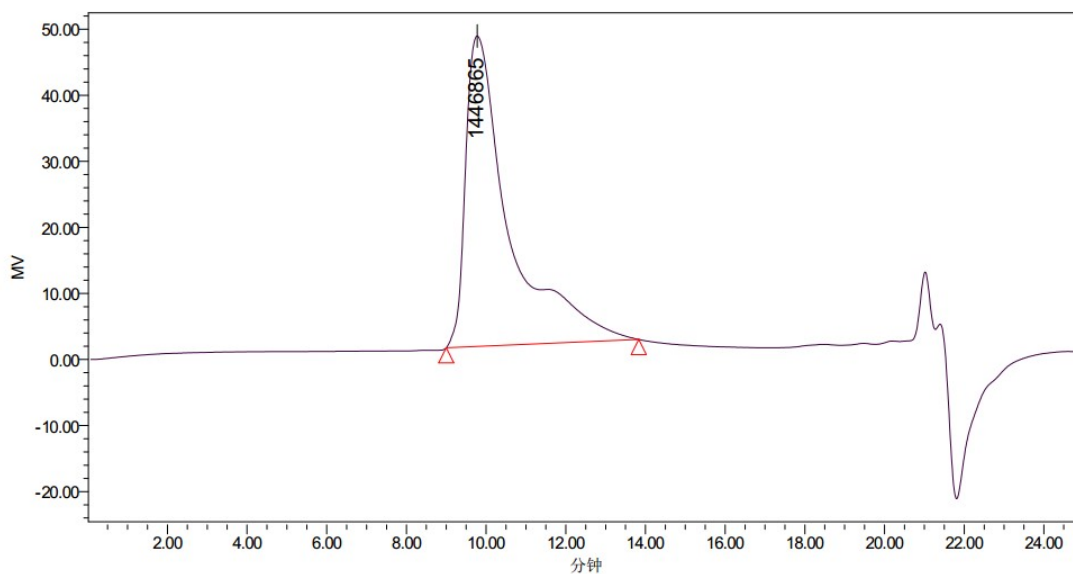

**GPC Results**

| Dist Name | Elution Volume (ml) | Retention Time (min) | Adjusted RT (min) | Mn     | Mw      | MP      | Mz      | Mz+1    | Mz/Mw    |
|-----------|---------------------|----------------------|-------------------|--------|---------|---------|---------|---------|----------|
| 1         | 9.777               | 9.777                | 9.777             | 428411 | 1012349 | 1446865 | 1460213 | 1754591 | 1.442400 |

**Figure S39.** GPC curve of polyIPI obtained by complex **1d**/PPh<sub>3</sub> in Table 1, entry 30.

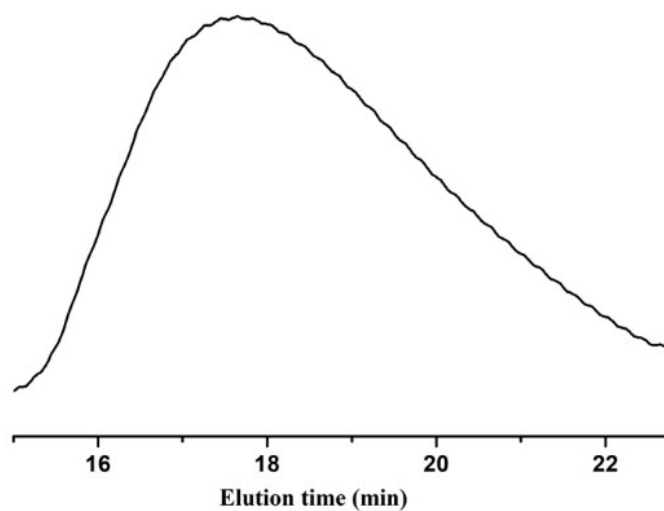

| Peak No | $M_n$ (Da) | $M_w$ (Da) | PDI   |
|---------|------------|------------|-------|
| 1       | 14242      | 29580      | 2.077 |

**Figure S40.** GPC curve of poly(D-OEGI) obtained by complex **1d**/PPh<sub>3</sub> in Table 1, entry 32.

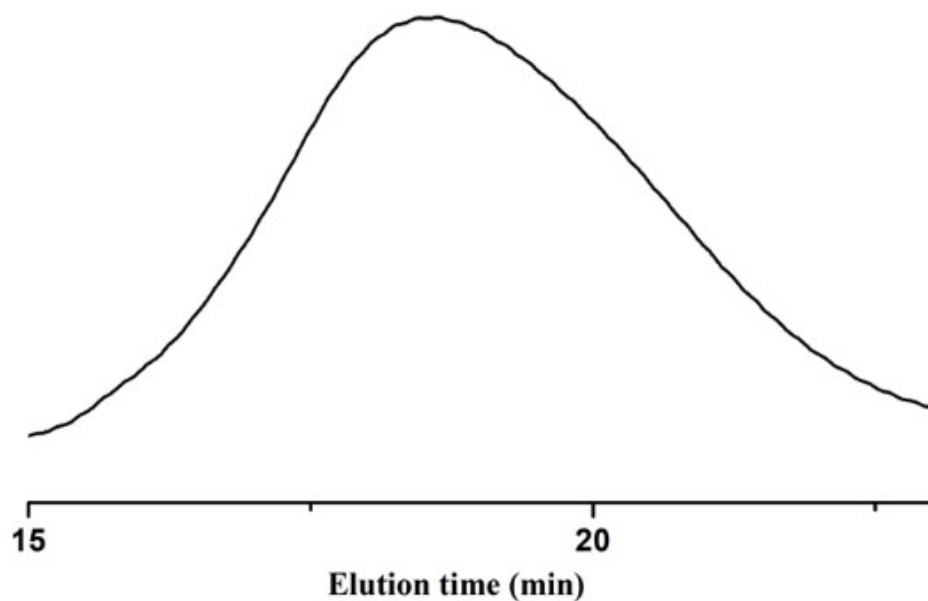

| Peak No | $M_n$ (Da) | $M_w$ (Da) | PDI   |
|---------|------------|------------|-------|
| 1       | 10982      | 20634      | 1.879 |

**Figure S41.** GPC curve of poly(L-OEGI) obtained by complex **1d**/PPh<sub>3</sub> in Table 1, entry 33.

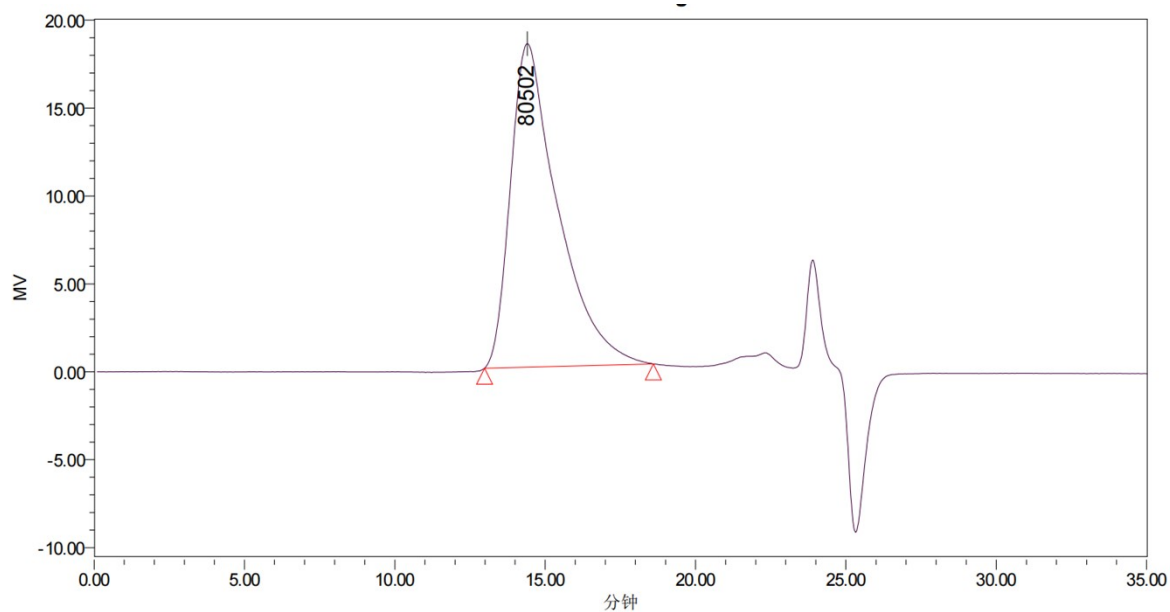

| GPC Results |           |                     |                      |                   |       |       |       |        |        |          |          |
|-------------|-----------|---------------------|----------------------|-------------------|-------|-------|-------|--------|--------|----------|----------|
|             | Dist Name | Elution Volume (ml) | Retention Time (min) | Adjusted RT (min) | Mn    | Mw    | MP    | Mz     | Mz+1   | Mz/Mw    | Mz+1/Mw  |
| 1           |           | 14.406              | 14.406               | 14.406            | 44073 | 73121 | 80502 | 107826 | 145147 | 1.474623 | 1.985017 |

**Figure S42.** GPC curve of polyEPI obtained by complex **1d** in Table 1, entry 34.

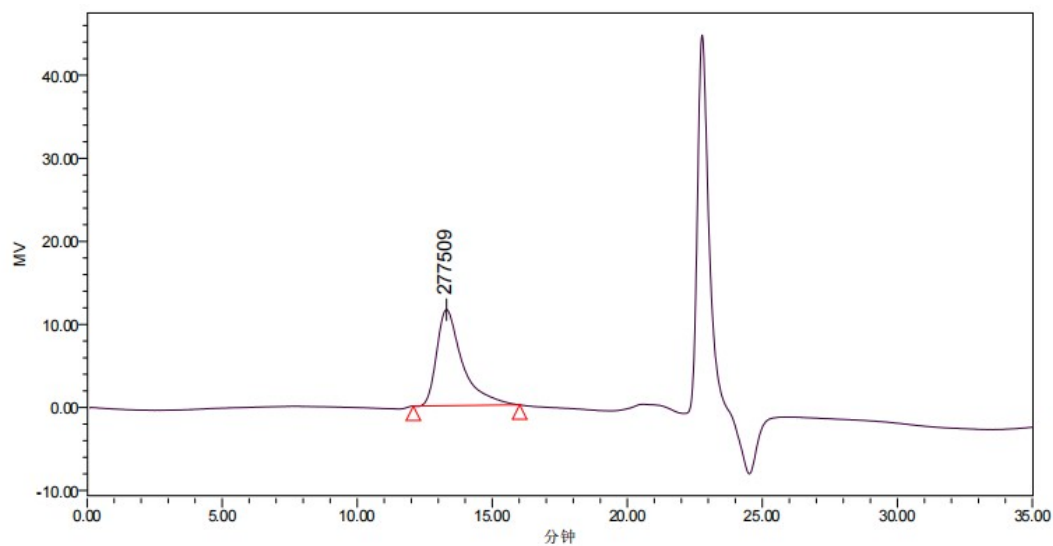

**GPC Results**

| Dist Name | Elution Volume (ml) | Retention Time (min) | Adjusted RT (min) | Mn     | Mw     | MP     | Mz     | Mz+1   | Mz/Mw    |
|-----------|---------------------|----------------------|-------------------|--------|--------|--------|--------|--------|----------|
| 1         | 13.309              | 13.309               | 13.309            | 164756 | 255436 | 277509 | 345858 | 434839 | 1.353991 |

**Figure S43.** GPC curve of polyEPI obtained by complex **1d** in Table 1, entry 35.

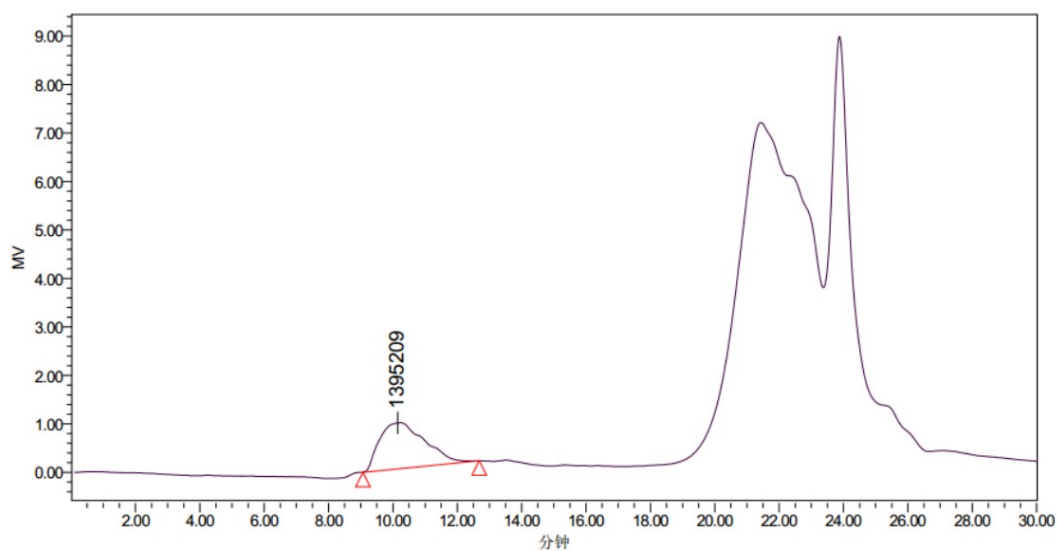

**GPC Results**

| Dist Name | Elution Volume (ml) | Retention Time (min) | Adjusted RT (min) | Mn     | Mw      | MP      | Mz      | Mz+1    | Mz/Mw    |
|-----------|---------------------|----------------------|-------------------|--------|---------|---------|---------|---------|----------|
| 1         | 10.150              | 10.150               | 10.150            | 990355 | 1329904 | 1395209 | 1679673 | 1986588 | 1.263004 |

**Figure S44.** GPC curve of polyITPB obtained by complex **1d** in Table 1, entry 36.

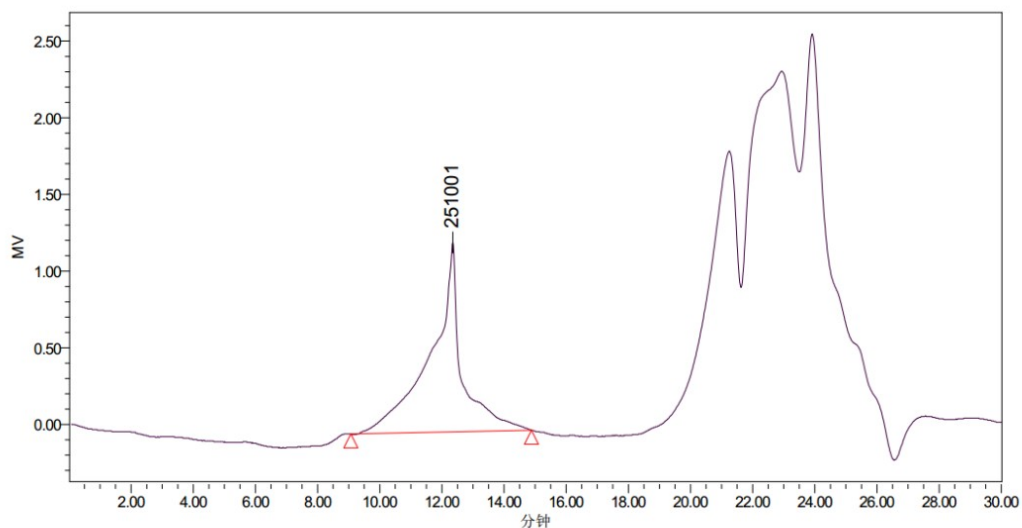

**GPC Results**

| Dist Name | Elution Volume (ml) | Retention Time (min) | Adjusted RT (min) | Mn     | Mw     | MP     | Mz     | Mz+1    | Mz/Mw    |
|-----------|---------------------|----------------------|-------------------|--------|--------|--------|--------|---------|----------|
| 1         | 12.348              | 12.348               | 12.348            | 275891 | 415496 | 251001 | 689322 | 1109467 | 1.659033 |

**Figure S45.** GPC curve of polyITPB obtained by complex **1d** in Table 1, entry 37.

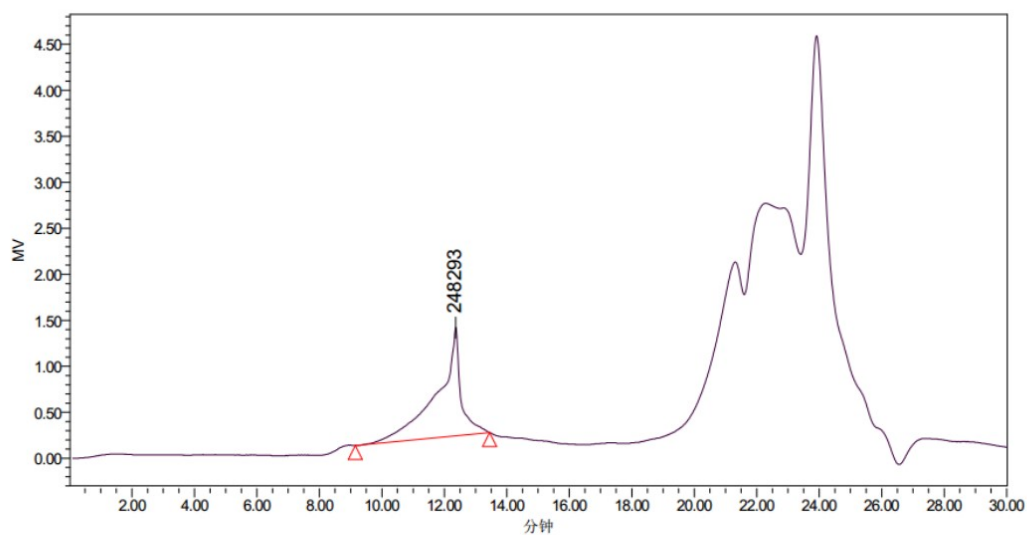

**GPC Results**

| Dist Name | Elution Volume (ml) | Retention Time (min) | Adjusted RT (min) | Mn     | Mw     | MP     | Mz     | Mz+1   | Mz/Mw    |
|-----------|---------------------|----------------------|-------------------|--------|--------|--------|--------|--------|----------|
| 1         | 12.364              | 12.364               | 12.364            | 320598 | 410462 | 248293 | 587190 | 873230 | 1.430559 |

**Figure S46.** GPC curve of polyITPB obtained by complex **1d** in Table 1, entry 38.

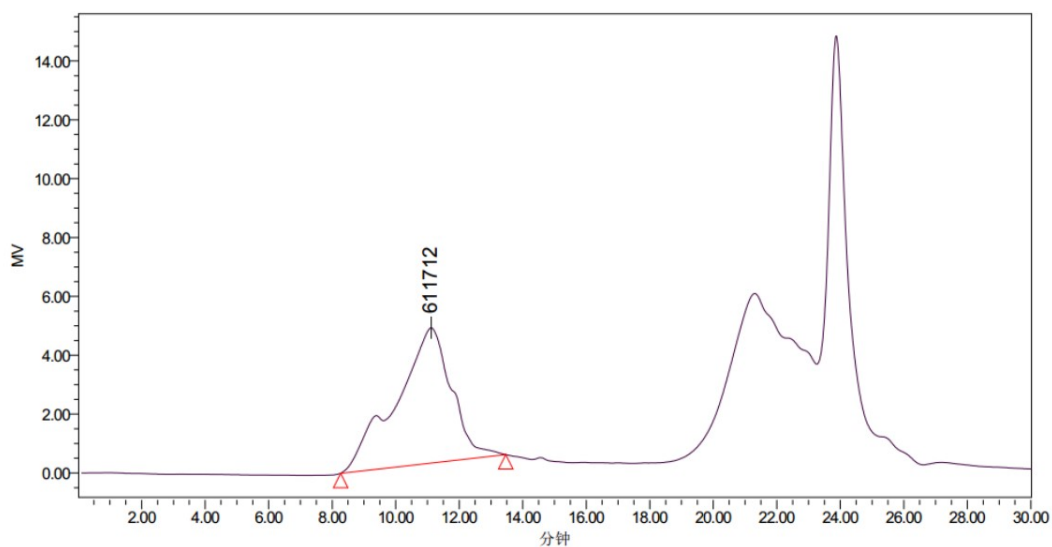

**GPC Results**

| Dist Name | Elution Volume (ml) | Retention Time (min) | Adjusted RT (min) | Mn     | Mw      | MP     | Mz      | Mz+1    | Mz/Mw    |
|-----------|---------------------|----------------------|-------------------|--------|---------|--------|---------|---------|----------|
| 1         | 11.117              | 11.117               | 11.117            | 665868 | 1231175 | 611712 | 2452921 | 3885247 | 1.992340 |

**Figure S47.** GPC curve of polyIPI obtained by complex **1d** in Table 1, entry 39.

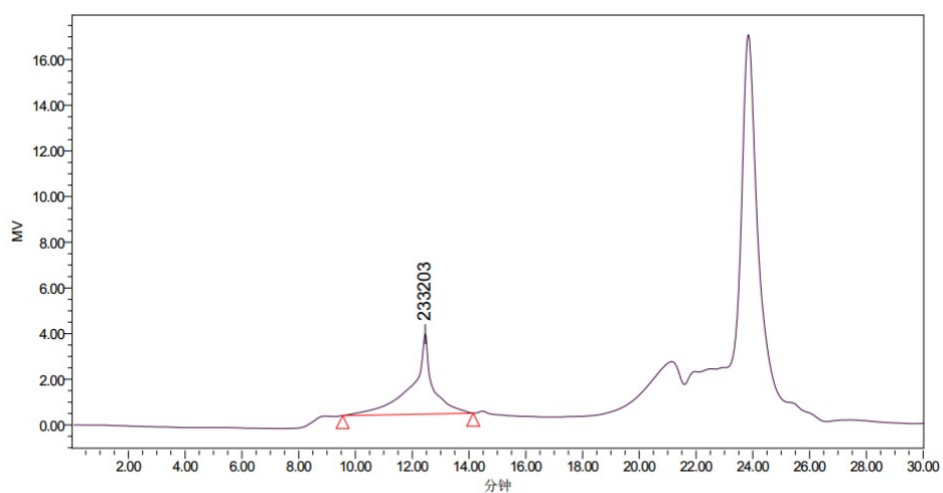

**GPC Results**

| Dist Name | Elution Volume (ml) | Retention Time (min) | Adjusted RT (min) | Mn     | Mw     | MP     | Mz     | Mz+1   | Mz/Mw    |
|-----------|---------------------|----------------------|-------------------|--------|--------|--------|--------|--------|----------|
| 1         | 12.460              | 12.460               | 12.460            | 259395 | 342802 | 233203 | 527950 | 859586 | 1.540102 |

**Figure S48.** GPC curve of polyIPI obtained by complex **1d** in Table 1, entry 40.

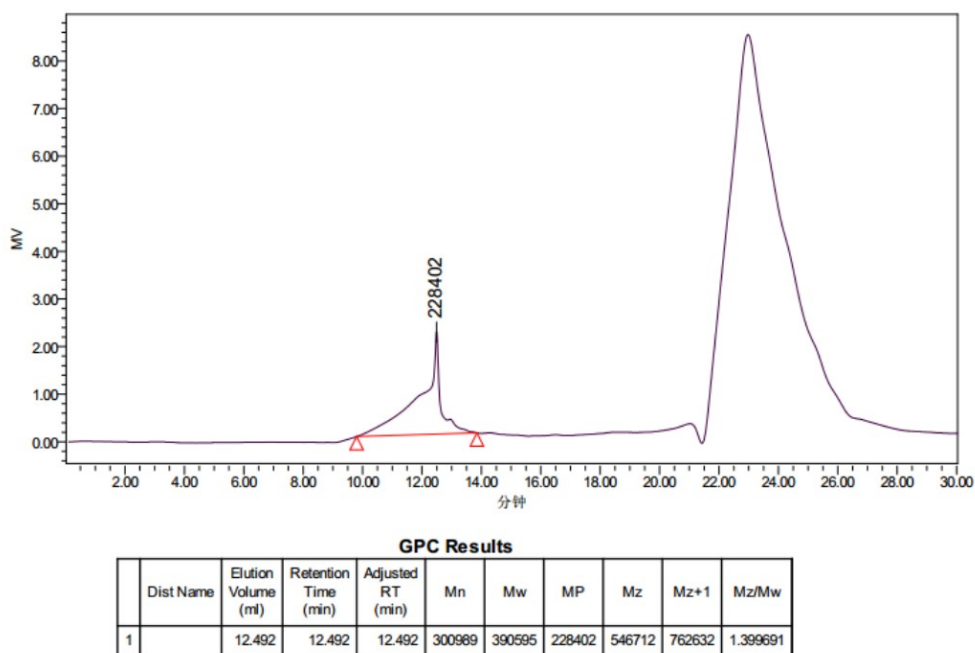

**Figure S49.** GPC curve of polyIPI obtained by complex **1d** in Table 1, entry 41.

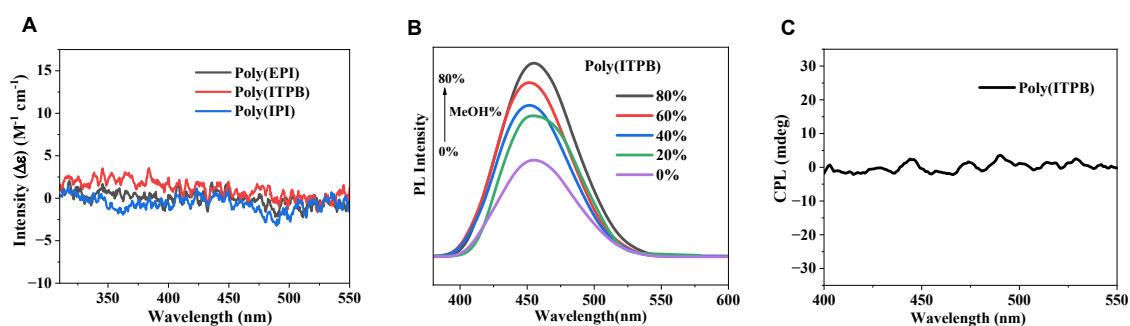

**Figure S50.** (A) CD spectra of poly(EPI), poly(I)TPB, and poly(I)PI obtained by complex **1d** in THF ( $c = 0.2 \text{ mg mL}^{-1}$ ) at  $25 \text{ }^\circ\text{C}$ . (B) PL spectra of poly(I)TPB obtained by complex **1d** in the different concentration ratios of MeOH/THF ( $c = 0.5 \text{ mg mL}^{-1}$ , under  $365 \text{ nm}$  UV irradiation). (C) CPL spectra of poly(I)TPB obtained by complex **1d** in THF ( $c = 0.2 \text{ mg mL}^{-1}$ ).

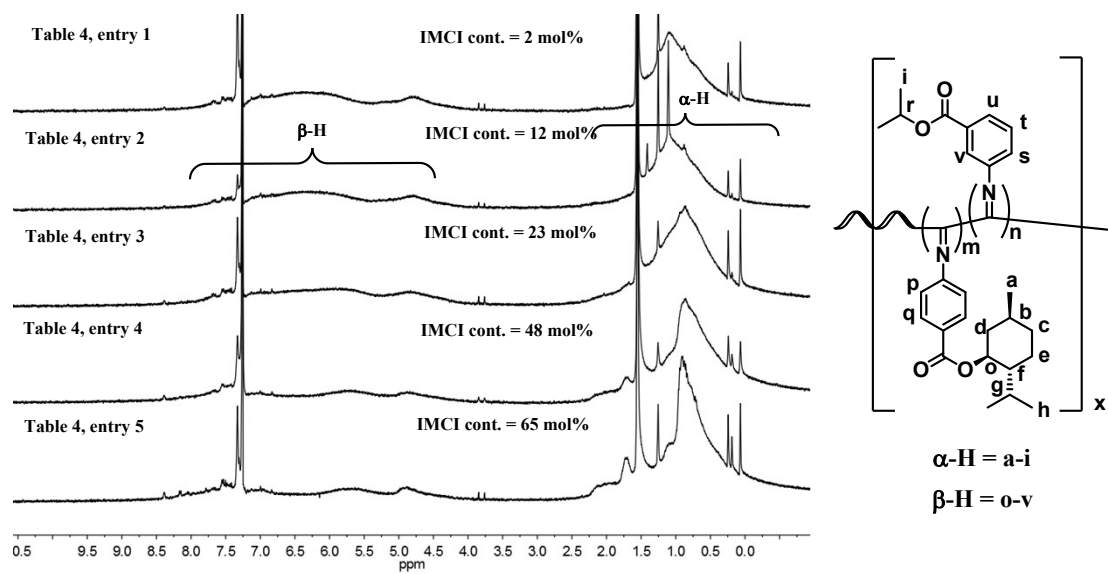

**Figure S51.**  $^1\text{H}$  NMR spectra of poly(D-IMCI-co-IPI)s (Table 2, entries 1-5).

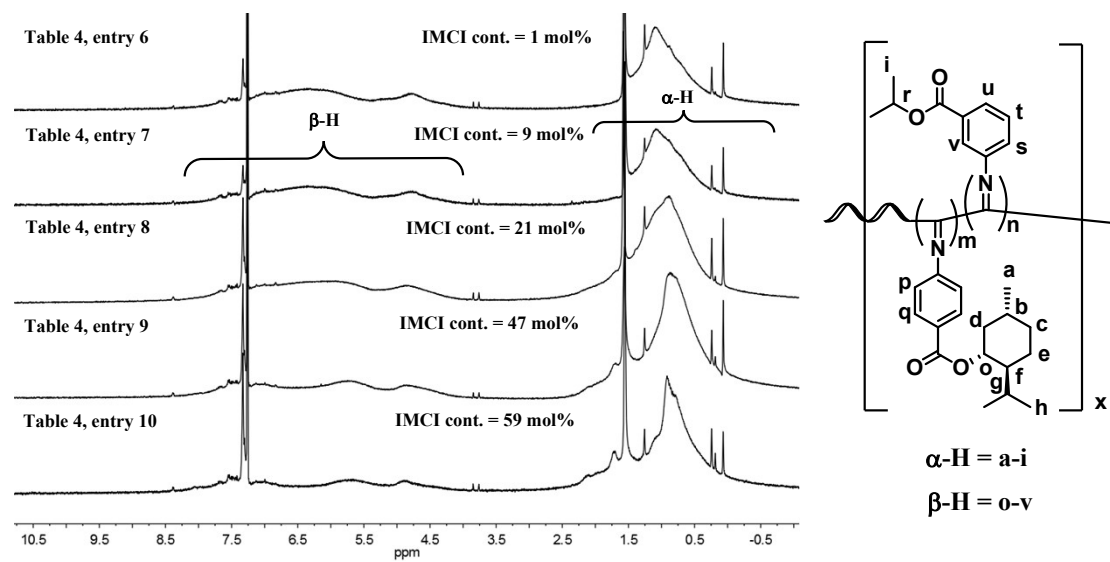

**Figure S52.**  $^1\text{H}$  NMR spectra of poly(L-IMCI-co-IPI)s (Table 2, entries 6-10).

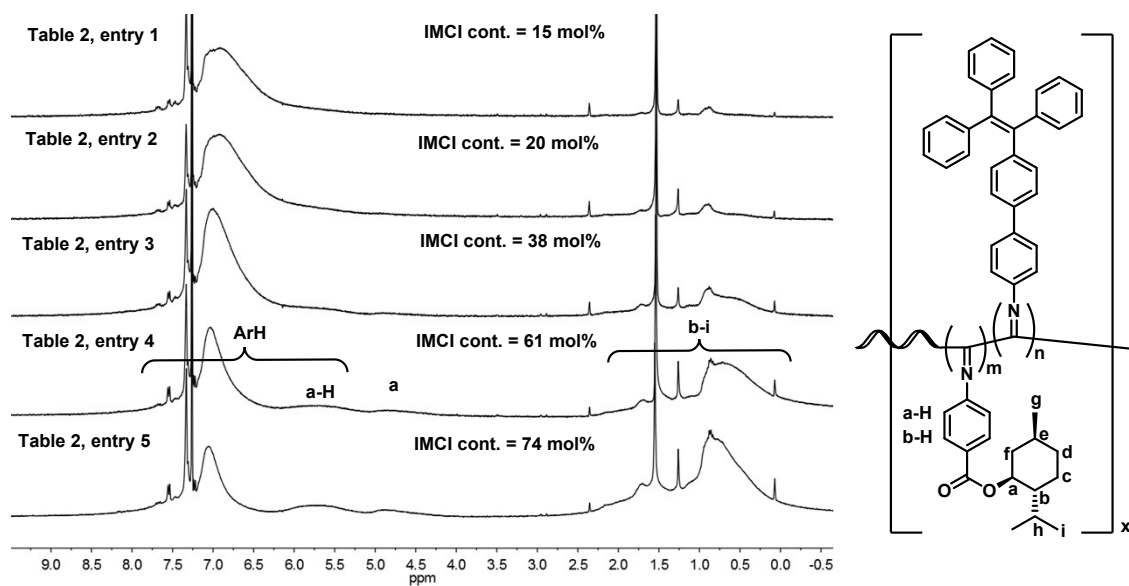

**Figure S53.**  $^1\text{H}$  NMR spectra of poly(D-IMCI-co-ITPB)s (Table 2, entries 11-15).

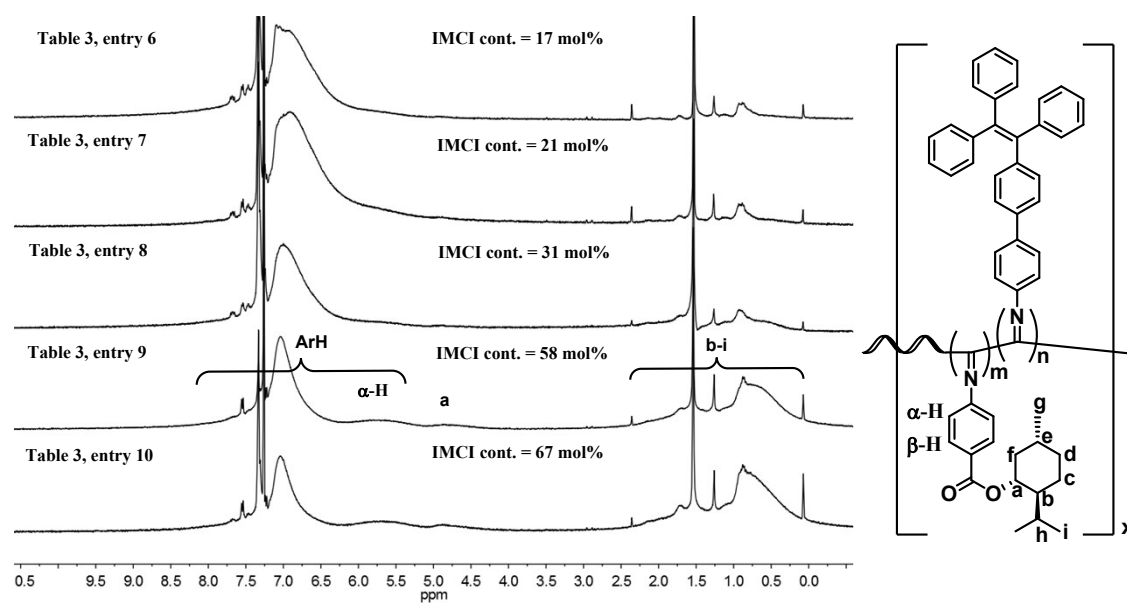

**Figure S54.**  $^1\text{H}$  NMR spectra of poly(L-IMCI-co-ITPB)s (Table 2, entries 16-20).

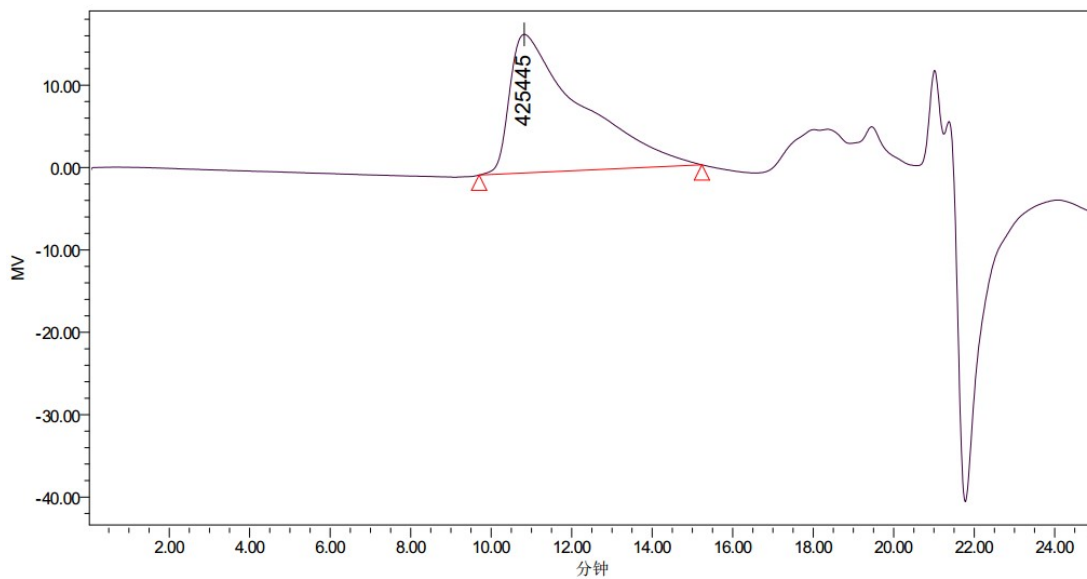

**GPC Results**

|   | Dist Name | Elution Volume (ml) | Retention Time (min) | Adjusted RT (min) | Mn     | Mw     | MP     | Mz     | Mz+1   | Mz/Mw    |
|---|-----------|---------------------|----------------------|-------------------|--------|--------|--------|--------|--------|----------|
| 1 |           | 10.822              | 10.822               | 10.822            | 120049 | 260412 | 425445 | 409791 | 523903 | 1.573627 |

**Figure S55.** GPC curve of poly(D-IMCI-co-IPI) obtained by complex **1d**/PPh<sub>3</sub> in Table 2, entry 1.

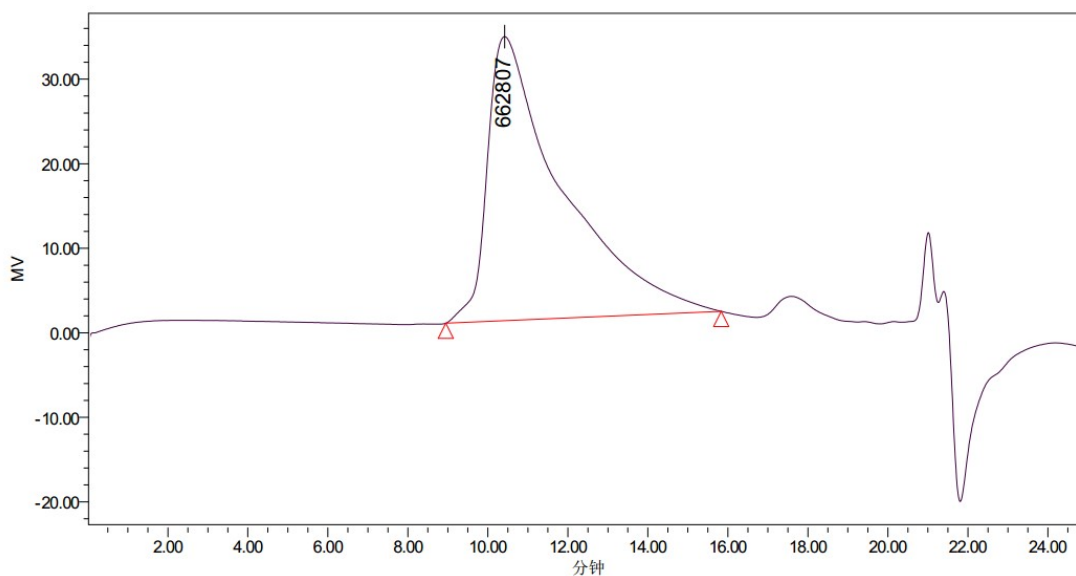

**GPC Results**

|   | Dist Name | Elution Volume (ml) | Retention Time (min) | Adjusted RT (min) | Mn     | Mw     | MP     | Mz     | Mz+1    | Mz/Mw    |
|---|-----------|---------------------|----------------------|-------------------|--------|--------|--------|--------|---------|----------|
| 1 |           | 10.419              | 10.419               | 10.419            | 140858 | 435217 | 662807 | 828133 | 1283166 | 1.902805 |

**Figure S56.** GPC curve of poly(D-IMCI-co-IPI) obtained by complex **1d**/PPh<sub>3</sub> in Table 1, entry 2.

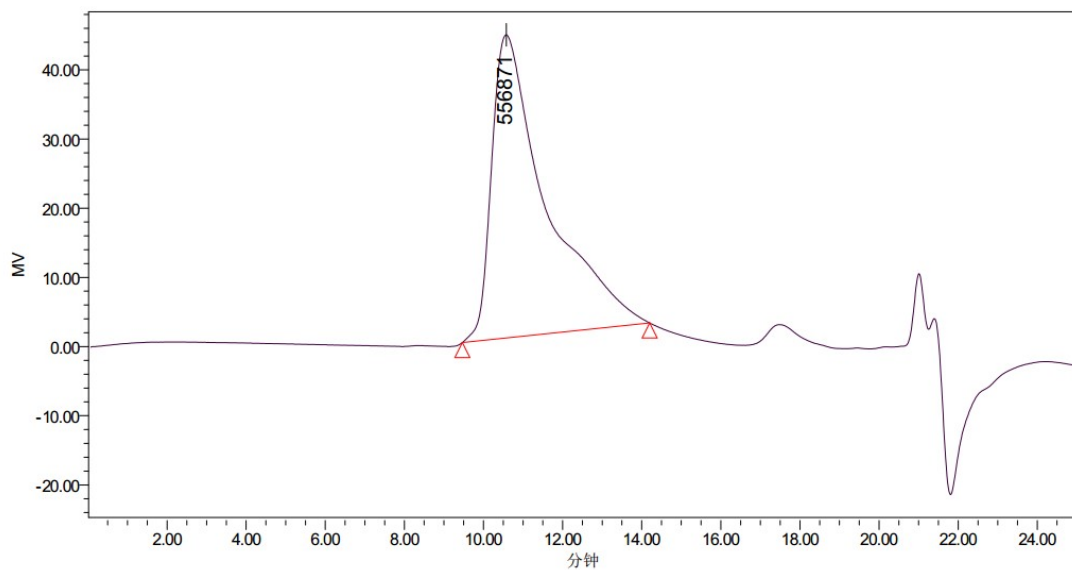

**GPC Results**

| Dist Name | Elution Volume (ml) | Retention Time (min) | Adjusted RT (min) | Mn     | Mw     | MP     | Mz     | Mz+1   | Mz/Mw    |
|-----------|---------------------|----------------------|-------------------|--------|--------|--------|--------|--------|----------|
| 1         | 10.574              | 10.574               | 10.574            | 209043 | 400463 | 556871 | 585588 | 737831 | 1.462278 |

**Figure S57.** GPC curve of poly(D-IMCI-co-IPI) obtained by complex **1d**/PPh<sub>3</sub> in Table 2, entry 3.

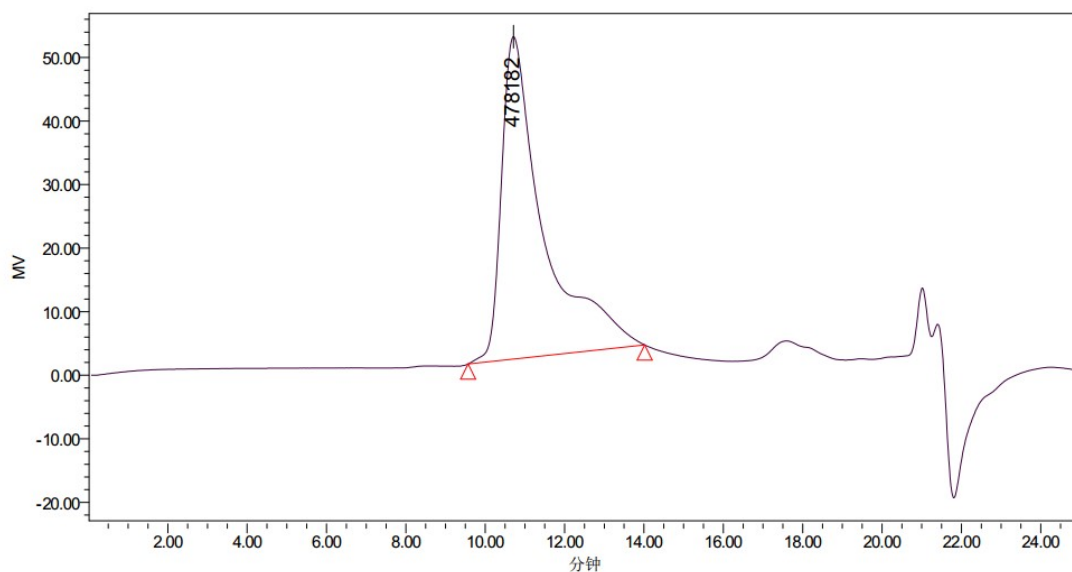

**GPC Results**

| Dist Name | Elution Volume (ml) | Retention Time (min) | Adjusted RT (min) | Mn     | Mw     | MP     | Mz     | Mz+1   | Mz/Mw    |
|-----------|---------------------|----------------------|-------------------|--------|--------|--------|--------|--------|----------|
| 1         | 10.713              | 10.713               | 10.713            | 214622 | 362539 | 478182 | 484633 | 584799 | 1.336777 |

**Figure S58.** GPC curve of poly(D-IMCI-co-IPI) obtained by complex **1d**/PPh<sub>3</sub> in Table 2, entry 4.

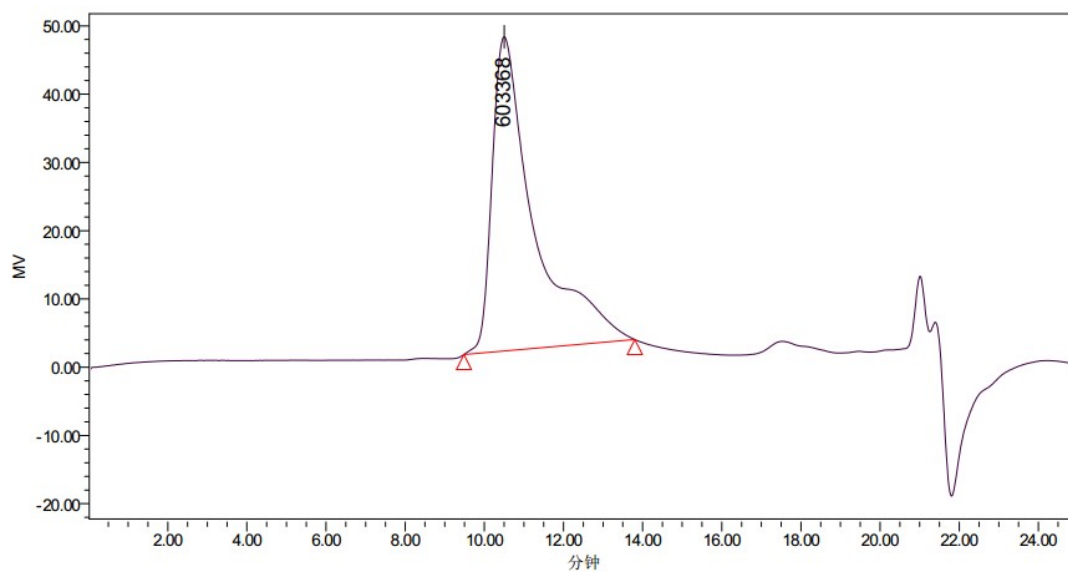

**GPC Results**

| Dist Name | Elution Volume (ml) | Retention Time (min) | Adjusted RT (min) | Mn     | Mw     | MP     | Mz     | Mz+1   | Mz/Mw    |
|-----------|---------------------|----------------------|-------------------|--------|--------|--------|--------|--------|----------|
| 1         | 10.502              | 10.502               | 10.502            | 260557 | 453520 | 603368 | 610560 | 730097 | 1.346269 |

**Figure S59.** GPC curve of poly(D-IMCI-co-IPI) obtained by complex **1d**/PPh<sub>3</sub> in Table 2, entry 5.

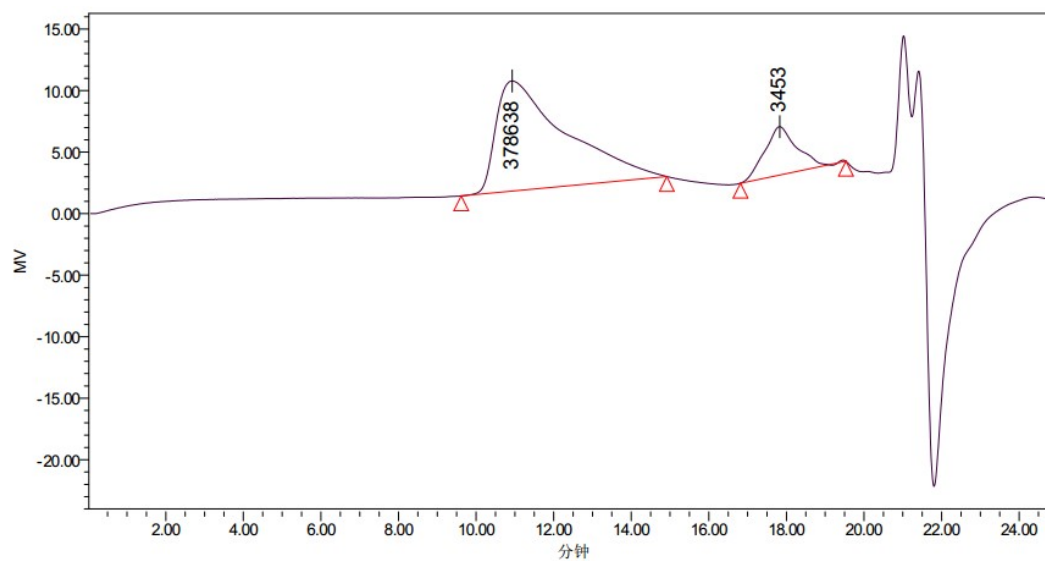

**GPC Results**

| Dist Name | Elution Volume (ml) | Retention Time (min) | Adjusted RT (min) | Mn     | Mw     | MP     | Mz     | Mz+1   | Mz/Mw    |
|-----------|---------------------|----------------------|-------------------|--------|--------|--------|--------|--------|----------|
| 1         | 10.934              | 10.934               | 10.934            | 124539 | 250498 | 378638 | 384290 | 487161 | 1.534100 |
| 2         | 17.827              | 17.827               | 17.827            | 3182   | 3422   | 3453   | 3652   | 3868   | 1.067284 |

**Figure S60.** GPC curve of poly(L-IMCI-co-IPI) obtained by complex **1d**/PPh<sub>3</sub> in Table 2, entry 6.

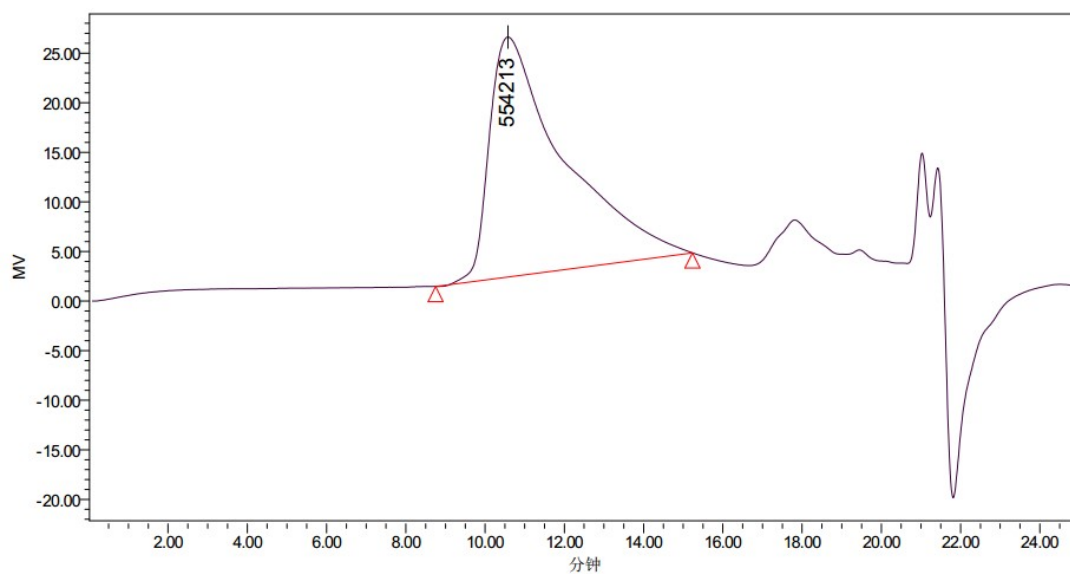

GPC Results

|   | Dist Name | Elution Volume (ml) | Retention Time (min) | Adjusted RT (min) | Mn     | Mw     | MP     | Mz     | Mz+1   | Mz/Mw    |
|---|-----------|---------------------|----------------------|-------------------|--------|--------|--------|--------|--------|----------|
| 1 |           | 10.578              | 10.578               | 10.578            | 144126 | 378543 | 554213 | 665936 | 950800 | 1.759205 |

Figure S61. GPC curve of poly(L-IMCI-co-IPI) obtained by complex **1d**/PPh<sub>3</sub> in Table 2, entry 7.

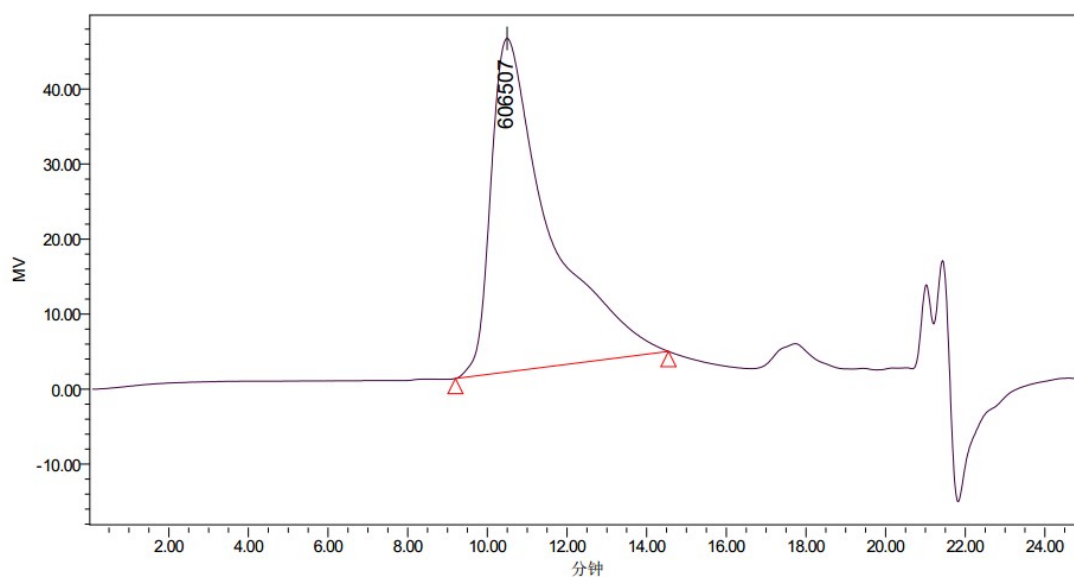

GPC Results

|   | Dist Name | Elution Volume (ml) | Retention Time (min) | Adjusted RT (min) | Mn     | Mw     | MP     | Mz     | Mz+1   | Mz/Mw    |
|---|-----------|---------------------|----------------------|-------------------|--------|--------|--------|--------|--------|----------|
| 1 |           | 10.498              | 10.498               | 10.498            | 204525 | 445851 | 606507 | 691424 | 910296 | 1.550793 |

Figure S62. GPC curve of poly(L-IMCI-co-IPI) obtained by complex **1d**/PPh<sub>3</sub> in Table 2, entry 8.

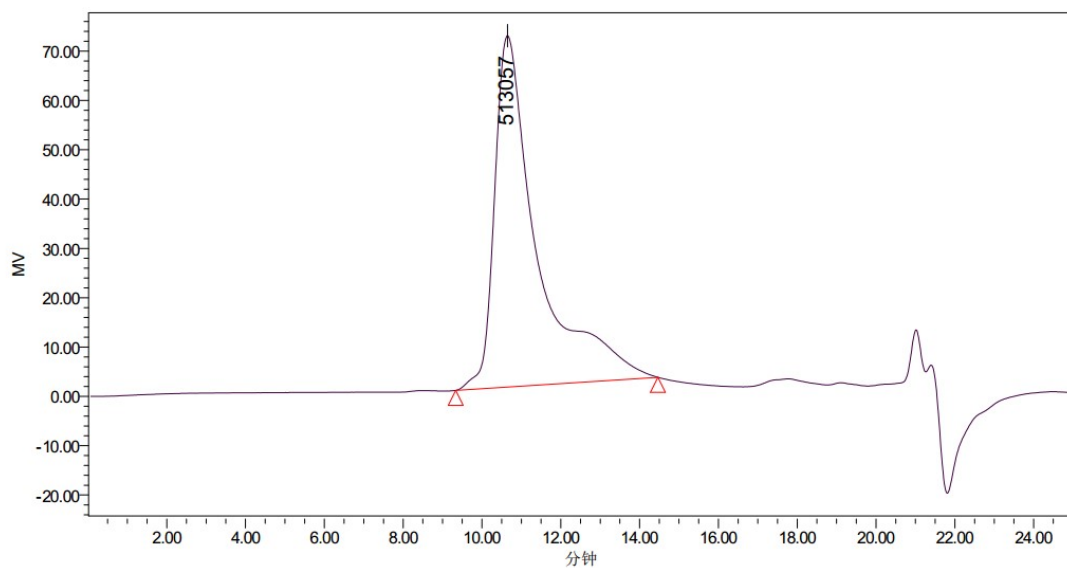

**GPC Results**

| Dist Name | Elution Volume (ml) | Retention Time (min) | Adjusted RT (min) | Mn     | Mw     | MP     | Mz     | Mz+1   | Mz/Mw    |
|-----------|---------------------|----------------------|-------------------|--------|--------|--------|--------|--------|----------|
| 1         | 10.648              | 10.648               | 10.648            | 212776 | 400536 | 513057 | 561282 | 717331 | 1.401328 |

**Figure S63.** GPC curve of poly(L-IMCI-co-IPI) obtained by complex **1d**/PPh<sub>3</sub> in Table 2, entry 9.

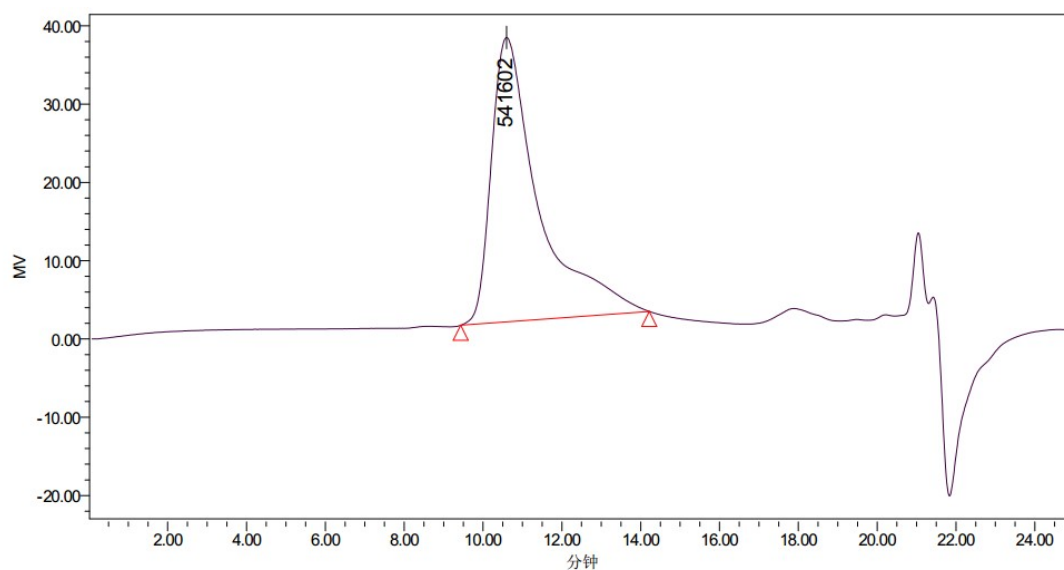

**GPC Results**

| Dist Name | Elution Volume (ml) | Retention Time (min) | Adjusted RT (min) | Mn     | Mw     | MP     | Mz     | Mz+1   | Mz/Mw    |
|-----------|---------------------|----------------------|-------------------|--------|--------|--------|--------|--------|----------|
| 1         | 10.599              | 10.599               | 10.599            | 234784 | 435710 | 541602 | 607172 | 747618 | 1.393522 |

**Figure S64.** GPC curve of poly(L-IMCI-co-IPI) obtained by complex **1d**/PPh<sub>3</sub> in Table 2, entry 10.

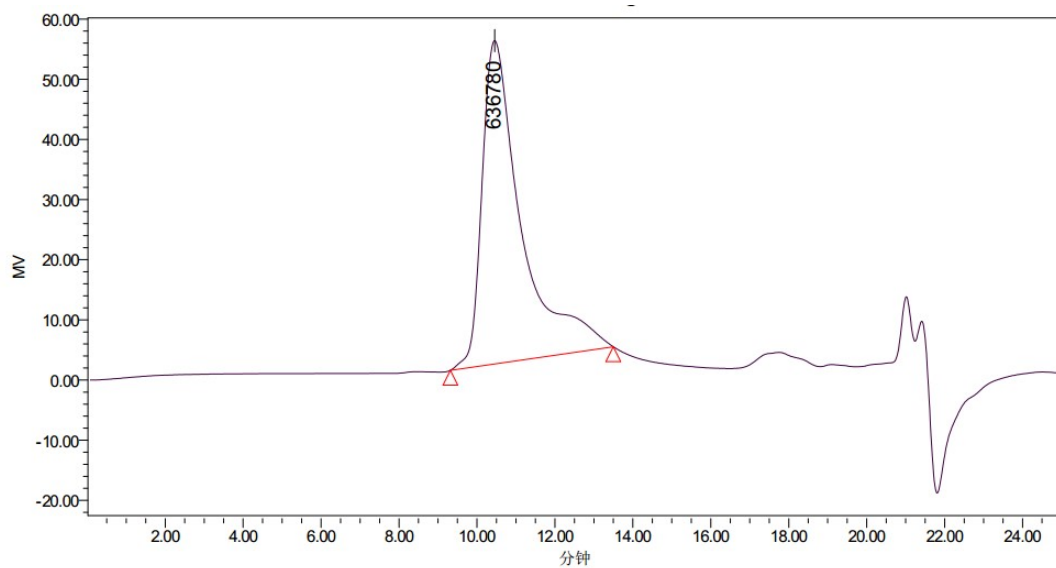

GPC Results

|   | Dist Name | Elution Volume (ml) | Retention Time (min) | Adjusted RT (min) | Mn     | Mw     | MP     | Mz     | Mz+1   | Mz/Mw    |
|---|-----------|---------------------|----------------------|-------------------|--------|--------|--------|--------|--------|----------|
| 1 |           | 10.455              | 10.455               | 10.455            | 311972 | 515652 | 636780 | 684591 | 835896 | 1.327621 |

Figure S65. GPC curve of poly(D-IMCI-co-ITPB) obtained by complex **1d**/PPh<sub>3</sub> in Table 2, entry 11.

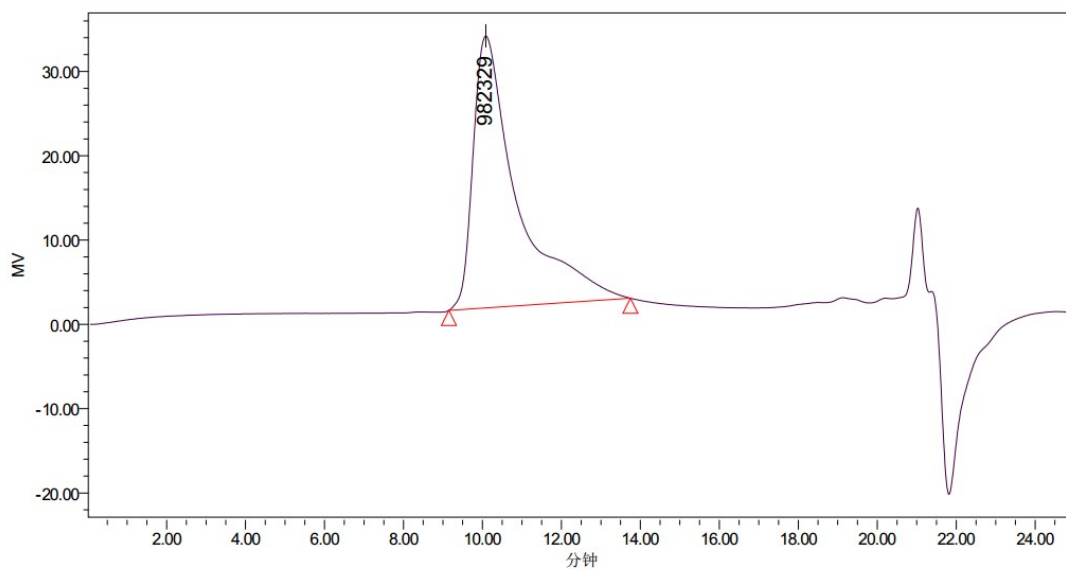

GPC Results

|   | Dist Name | Elution Volume (ml) | Retention Time (min) | Adjusted RT (min) | Mn     | Mw     | MP     | Mz      | Mz+1    | Mz/Mw    |
|---|-----------|---------------------|----------------------|-------------------|--------|--------|--------|---------|---------|----------|
| 1 |           | 10.086              | 10.086               | 10.086            | 363298 | 734519 | 982329 | 1036749 | 1261378 | 1.411467 |

Figure S66. GPC curve of poly(D-IMCI-co-ITPB) obtained by complex **1d**/PPh<sub>3</sub> in Table 2, entry 12.

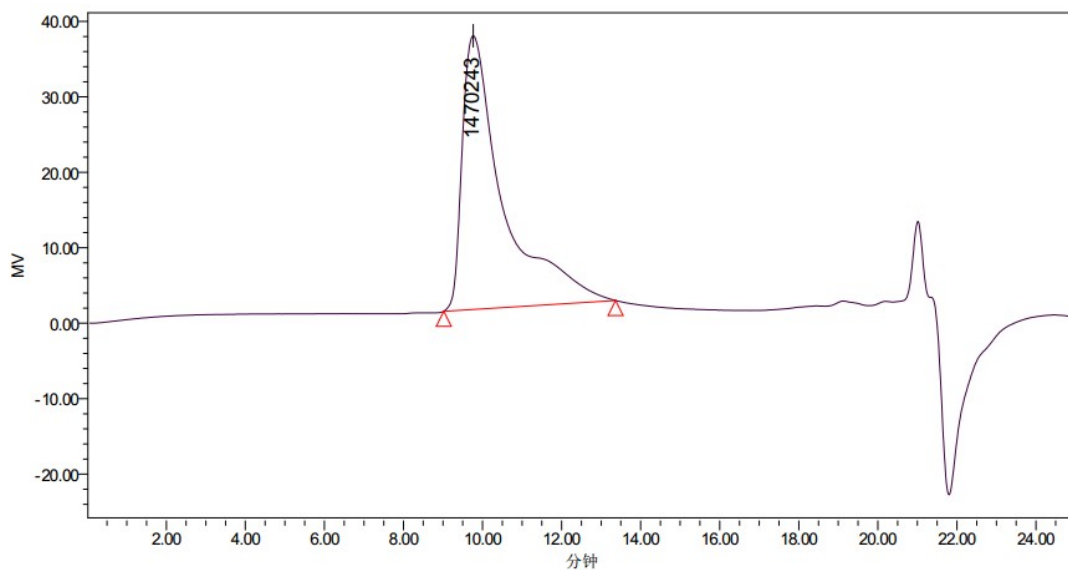

GPC Results

| Dist Name | Elution Volume (ml) | Retention Time (min) | Adjusted RT (min) | Mn     | Mw      | MP      | Mz      | Mz+1    | Mz/Mw    |
|-----------|---------------------|----------------------|-------------------|--------|---------|---------|---------|---------|----------|
| 1         | 9.765               | 9.765                | 9.765             | 488116 | 1035773 | 1470243 | 1451386 | 1717214 | 1.401259 |

Figure S67. GPC curve of poly(D-IMCI-co-ITPB) obtained by complex **1d**/PPh<sub>3</sub> in Table 2, entry 13.

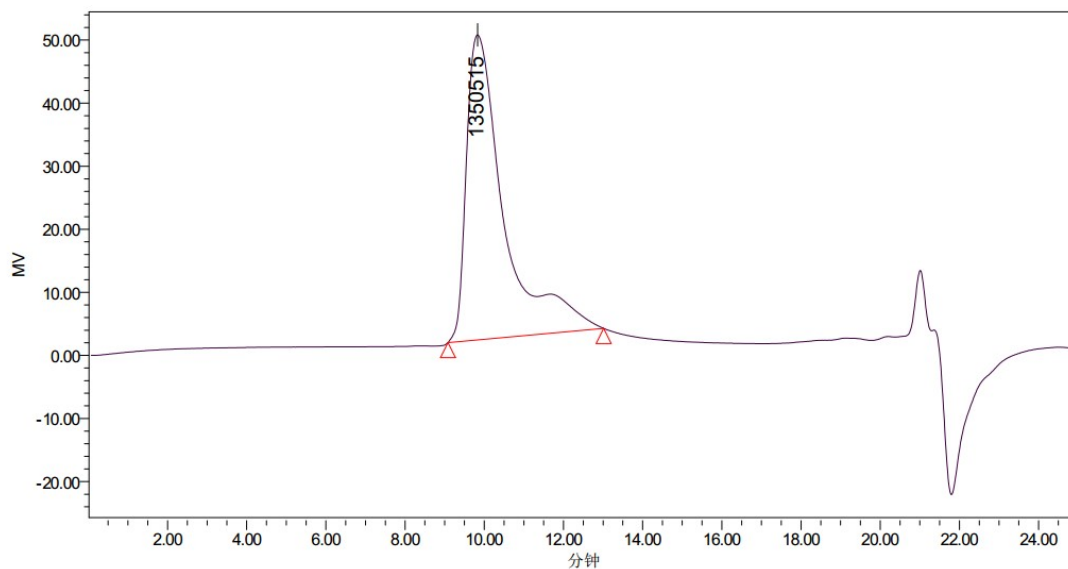

GPC Results

| Dist Name | Elution Volume (ml) | Retention Time (min) | Adjusted RT (min) | Mn     | Mw      | MP      | Mz      | Mz+1    | Mz/Mw    |
|-----------|---------------------|----------------------|-------------------|--------|---------|---------|---------|---------|----------|
| 1         | 9.831               | 9.831                | 9.831             | 549355 | 1024653 | 1350515 | 1361918 | 1591212 | 1.329150 |

Figure S68. GPC curve of poly(D-IMCI-co-ITPB) obtained by complex **1d**/PPh<sub>3</sub> in Table 2, entry 14.

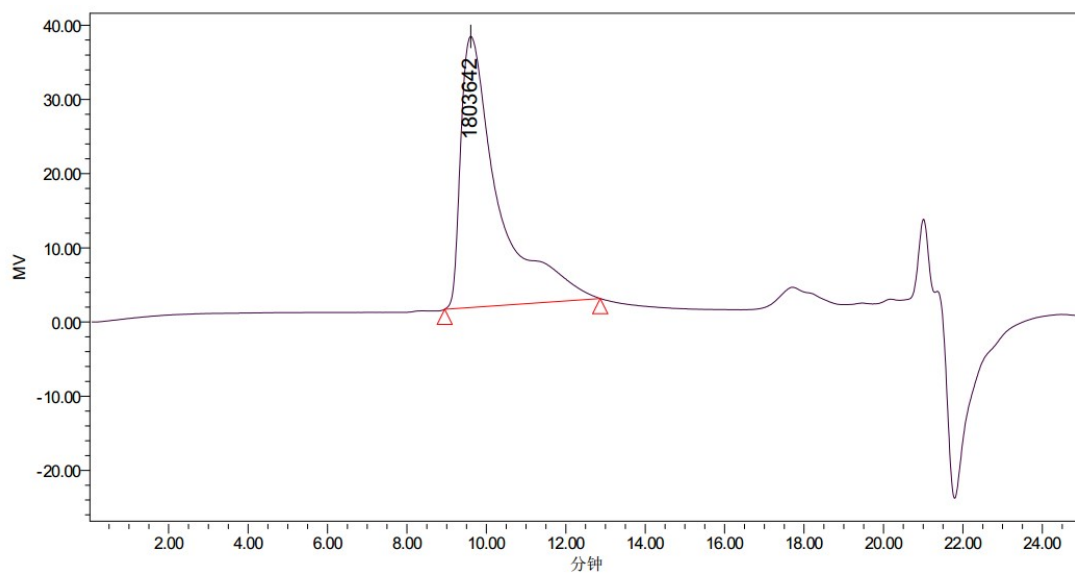

GPC Results

| Dist Name | Elution Volume (ml) | Retention Time (min) | Adjusted RT (min) | Mn     | Mw      | MP      | Mz      | Mz+1    | Mz/Mw    |
|-----------|---------------------|----------------------|-------------------|--------|---------|---------|---------|---------|----------|
| 1         | 9.609               | 9.609                | 9.609             | 641112 | 1275996 | 1803642 | 1737491 | 2024964 | 1.361674 |

Figure S69. GPC curve of poly(D-IMCI-co-ITPB) obtained by complex **1d**/PPh<sub>3</sub> in Table 2, entry 15.

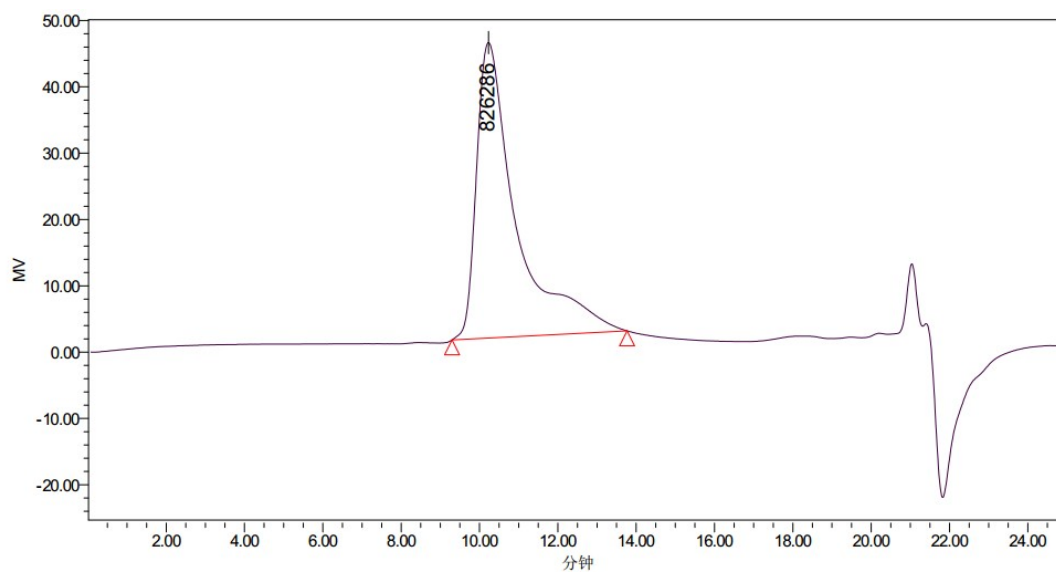

GPC Results

| Dist Name | Elution Volume (ml) | Retention Time (min) | Adjusted RT (min) | Mn     | Mw     | MP     | Mz     | Mz+1    | Mz/Mw    |
|-----------|---------------------|----------------------|-------------------|--------|--------|--------|--------|---------|----------|
| 1         | 10.230              | 10.230               | 10.230            | 336591 | 631895 | 826286 | 853609 | 1013582 | 1.350872 |

Figure S70. GPC curve of poly(L-IMCI-co-ITPB) obtained by complex **1d**/PPh<sub>3</sub> in Table 2, entry 16.

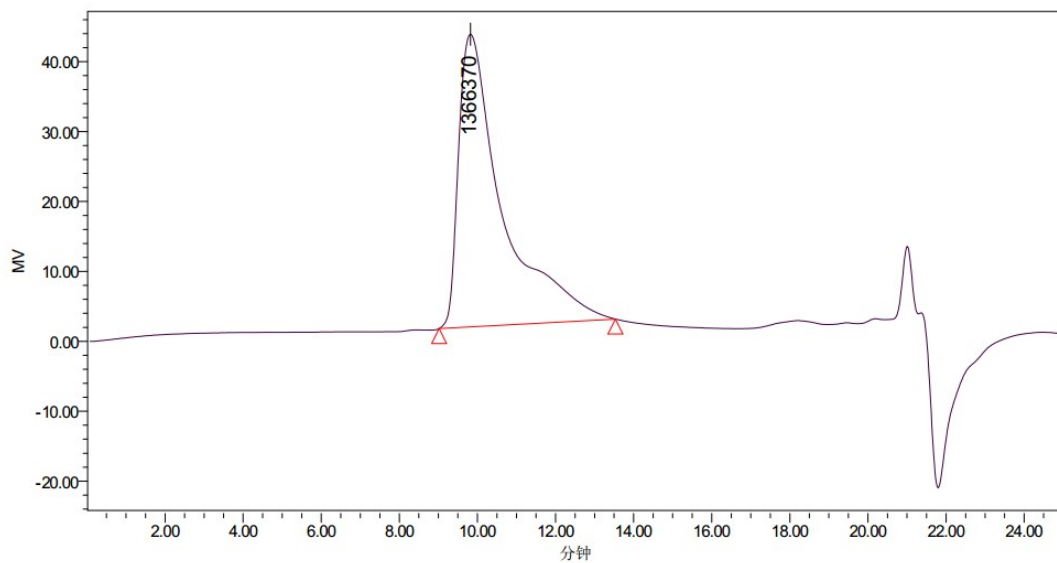

**GPC Results**

| Dist Name | Elution Volume (ml) | Retention Time (min) | Adjusted RT (min) | Mn     | Mw     | MP      | Mz      | Mz+1    | Mz/Mw    |
|-----------|---------------------|----------------------|-------------------|--------|--------|---------|---------|---------|----------|
| 1         | 9.822               | 9.822                | 9.822             | 452290 | 969937 | 1366370 | 1380426 | 1653577 | 1.423212 |

**Figure S71.** GPC curve of poly(L-IMCI-co-ITPB) obtained by complex **1d**/PPh<sub>3</sub> in Table 2, entry 17.

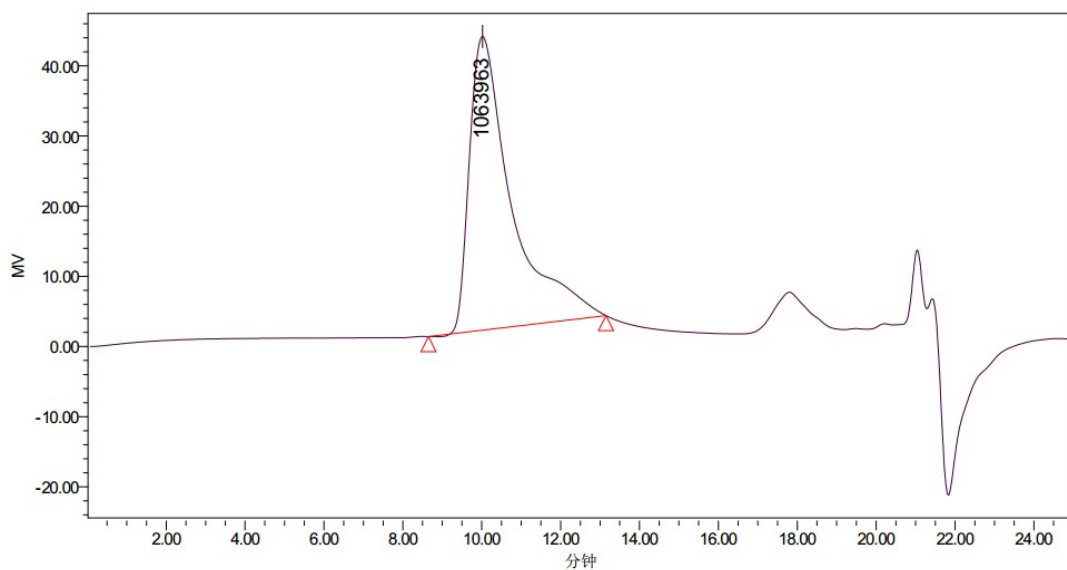

**GPC Results**

| Dist Name | Elution Volume (ml) | Retention Time (min) | Adjusted RT (min) | Mn     | Mw     | MP      | Mz      | Mz+1    | Mz/Mw    |
|-----------|---------------------|----------------------|-------------------|--------|--------|---------|---------|---------|----------|
| 1         | 10.021              | 10.021               | 10.021            | 454775 | 827711 | 1063963 | 1128287 | 1346932 | 1.363141 |

**Figure S72.** GPC curve of poly(L-IMCI-co-ITPB) obtained by complex **1d**/PPh<sub>3</sub> in Table 2, entry 18.

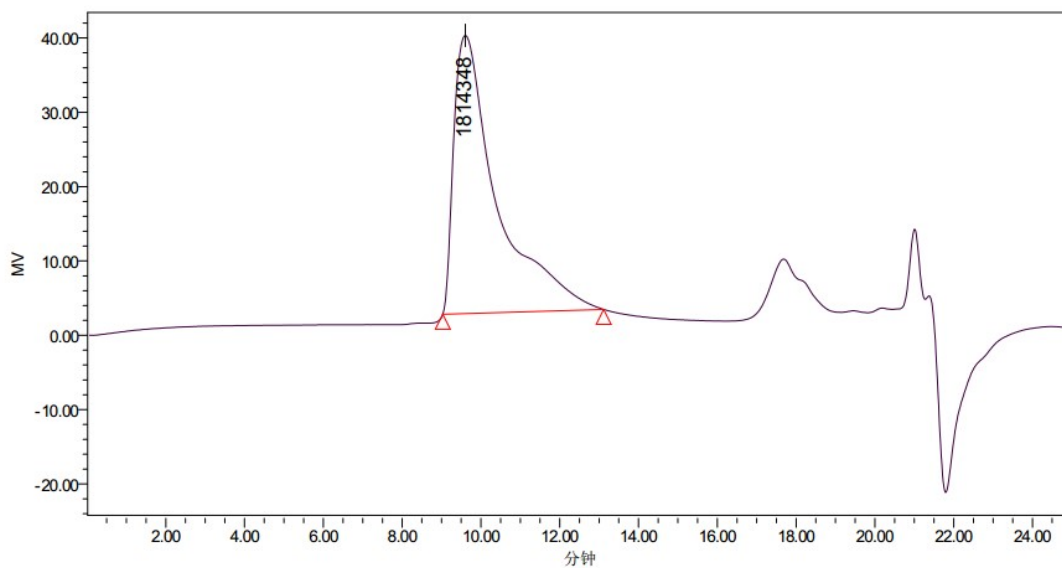

**GPC Results**

| Dist Name | Elution Volume (ml) | Retention Time (min) | Adjusted RT (min) | Mn     | Mw      | MP      | Mz      | Mz+1    | Mz/Mw    |
|-----------|---------------------|----------------------|-------------------|--------|---------|---------|---------|---------|----------|
| 1         | 9.605               | 9.605                | 9.605             | 591268 | 1266349 | 1814348 | 1794665 | 2124891 | 1.417196 |

**Figure S73.** GPC curve of poly(L-IMCI-co-ITPB) obtained by complex **1d**/PPh<sub>3</sub> in Table 2, entry 19.

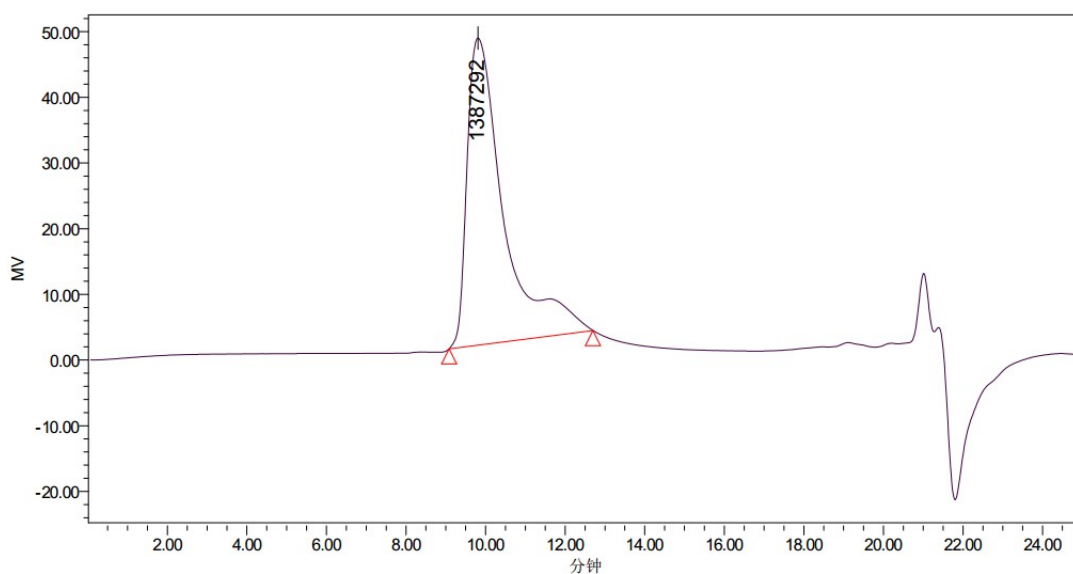

**GPC Results**

| Dist Name | Elution Volume (ml) | Retention Time (min) | Adjusted RT (min) | Mn     | Mw      | MP      | Mz      | Mz+1    | Mz/Mw    |
|-----------|---------------------|----------------------|-------------------|--------|---------|---------|---------|---------|----------|
| 1         | 9.810               | 9.810                | 9.810             | 610498 | 1061323 | 1387292 | 1385558 | 1610306 | 1.305500 |

**Figure S74.** GPC curve of poly(L-IMCI-co-ITPB) obtained by complex **1d**/PPh<sub>3</sub> in Table 2, entry 20.

### Calculation of the IMCI contents of the copolymers

The IMCI contents of poly(D-IMCI-*co*-ITPB)s and poly(L-IMCI-*co*-ITPB)s were calculated from the <sup>1</sup>H NMR spectra according to the following formula:

$$\text{Mol IMCI \%} = \{[23(\text{IH3} + \text{IH4})]/[19(\text{IH1} + \text{IH2} + \text{IH3} + \text{IH4})]\} \times 100$$

In which IH1 is the integration of the peak at 7.08 ppm which assigned to the aryl protons of ITPB units and the β-H of the aryl ring of IMCI units. IH2 is the integration of the peak at 5.82 ppm which assigned to the α-H of the aryl ring of IMCI units. IH3 is the integration of the peak at 4.88 ppm ascribed to the proton of the cyclohexyl carbon connected with the oxygen. IH4 is the integration of the peaks between 0.3 to 2.5 ppm which assigned to the rest protons of the cyclohexyl group as well as the substituted methyl and the isopropyl.

The IMCI contents of poly(D-IMCI-*co*-IPI)s and poly(L-IMCI-*co*-IPI)s were calculated from the <sup>1</sup>H NMR spectra according to the following formula:

$$\text{Mol IMCI \%} = \{[5 \times \text{IH4} - 6(\text{IH1} + \text{IH2} + \text{IH3})]/[12(\text{IH1} + \text{IH2} + \text{IH3})]\} \times 100$$

In which IH1 is the integration of the peak at 7.08 ppm which assigned to the aryl protons of IPI units and the H of the aryl ring of IMCI units. IH2 is the integration of the peak at 5.82 ppm which assigned to the H of the aryl ring of IMCI units. IH3 is the integration of the peak at 4.88 ppm ascribed to the proton of the cyclohexyl carbon connected with the oxygen and the proton of the isopropyl carbon connected with the oxygen. IH4 is the integration of the peaks between 0.3 to 2.5 ppm which assigned to the rest protons of the cyclohexyl group as well as the substituted methyl and the isopropyl and the rest protons of the isopropyl.

### Calculation of the reactivity ratio:

Formula: Fineman-Ross plot:

$$\frac{F}{f} * (f - 1) = r_1 * \frac{F^2}{f} - r_2$$

F: IPI/D-IMCI feed ratio in the reaction

f: IPI/D-IMCI content in the copolymers

Copolymerization of IPI with D-IMCI

| IPI<br>(mmol) | D-IMCI<br>(mmol) | IPI cont.<br>(%) | D-IMCI cont.<br>(%) | F      | f     | X      | Y     |
|---------------|------------------|------------------|---------------------|--------|-------|--------|-------|
| 0.368         | 0.138            | 51               | 49                  | 2.667  | 1.174 | 6.072  | 0.396 |
| 0.736         | 0.138            | 69               | 31                  | 5.333  | 2.030 | 13.995 | 2.704 |
| 1.104         | 0.138            | 76               | 24                  | 8.000  | 2.846 | 22.432 | 5.183 |
| 1.472         | 0.138            | 81               | 19                  | 10.667 | 4.556 | 24.942 | 8.320 |

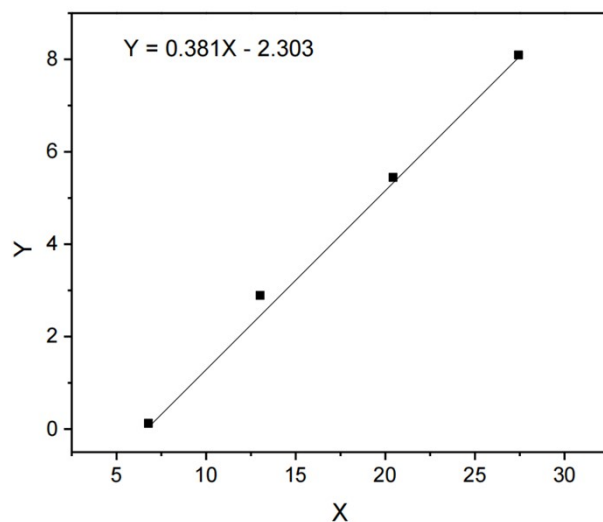

$$Y = 0.381 * X - 2.303$$

$$r_{\text{IPI}} = 0.381 \quad r_{\text{D-IMCI}} = 2.303$$

**Figure S75.** Experimental data of competitive aggregation rate between chiral isonitrile D-IMCI and non-chiral isonitrile IPI.

Copolymerization of ITPB with D-IMCI

| IPTB<br>(mmol) | D-IMCI<br>(mmol) | IPTB cont.<br>(%) | D-IMCI cont.<br>(%) | F      | f     | X      | Y     |
|----------------|------------------|-------------------|---------------------|--------|-------|--------|-------|
| 0.368          | 0.138            | 52                | 48                  | 2.667  | 1.067 | 6.668  | 0.167 |
| 0.736          | 0.138            | 66                | 34                  | 5.333  | 1.898 | 14.987 | 2.523 |
| 1.104          | 0.138            | 74                | 26                  | 8.000  | 2.772 | 23.089 | 5.114 |
| 1.472          | 0.138            | 79                | 21                  | 10.667 | 3.758 | 30.278 | 7.829 |

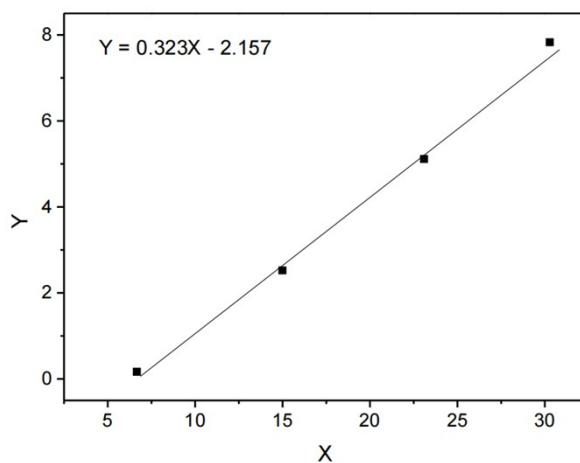

$$Y = 0.323 * X - 2.157$$

$$r_{\text{DMPDIB}} = 0.323 \quad r_{\text{L-IMCI}} = 2.157$$

**Figure S76.** Experimental data of competitive aggregation rate between chiral isonitrile D-IMCI and non-chiral isonitrile IPTB.

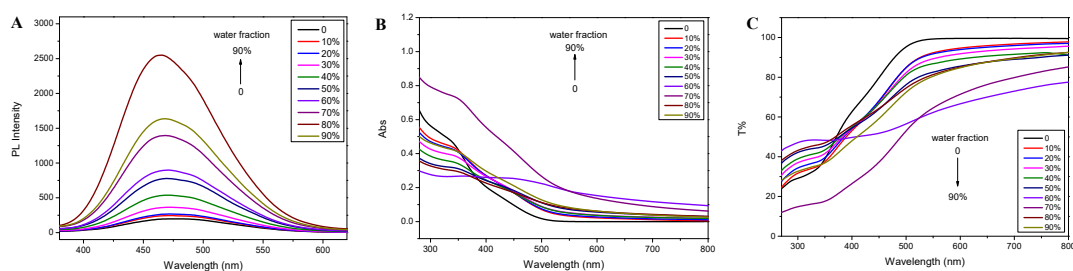

**Figure S77.** AIE nature characterization of ITPB monomer in THF/MeOH mixture. (A) Plots of fluorescence intensity vs water fraction in THF/MeOH mixture (0.01 mol of ITPB unit/mL, EX wavelength: 321 nm, EX slit: 5 nm, EM slit: 5 nm, 700 V). (B) The UV absorption spectra with the water fraction in THF/MeOH mixture ranging from 0 to 90%. (C) The UV/Vis transmittance spectra with the water fraction in THF/MeOH mixture ranging from 0 to 90%.

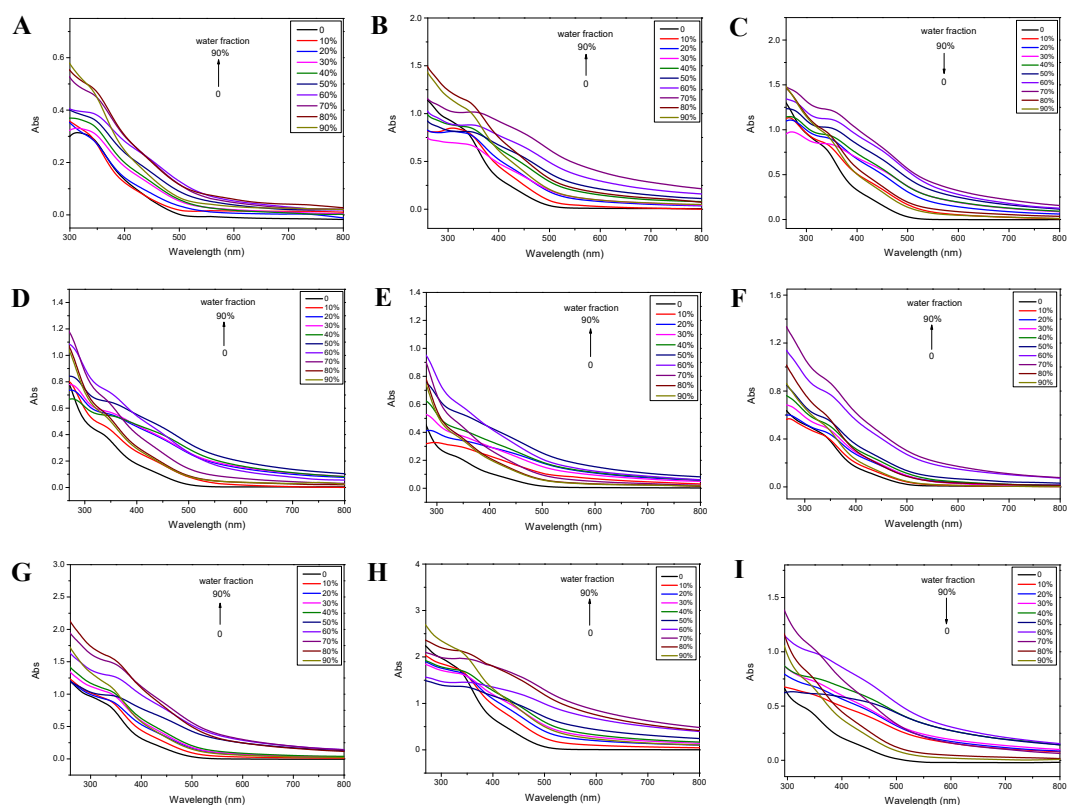

**Figure S78.** AIE nature characterization of (A) poly(D-IMCI-co-ITPB) (Table 2, entry 11), (B) poly(D-IMCI-co-ITPB) (Table 2, entry 12), (C) poly(D-IMCI-co-ITPB) (Table 2, entry 13), (D) poly(D-IMCI-co-ITPB) (Table 2, entry 14), (E) poly(D-IMCI-co-ITPB) (Table 2, entry 15), (F) poly(L-IMCI-co-ITPB) (Table 2, entry 16), (G) poly(L-IMCI-co-ITPB) (Table 2, entry 18), (H) poly(L-IMCI-co-ITPB) (Table 2, entry 19), (I) poly(L-IMCI-co-ITPB) (Table 2, entry 20) in THF/MeOH mixture. The UV absorption spectra with the water fraction in THF/MeOH mixture ranging from 0 to 90%.

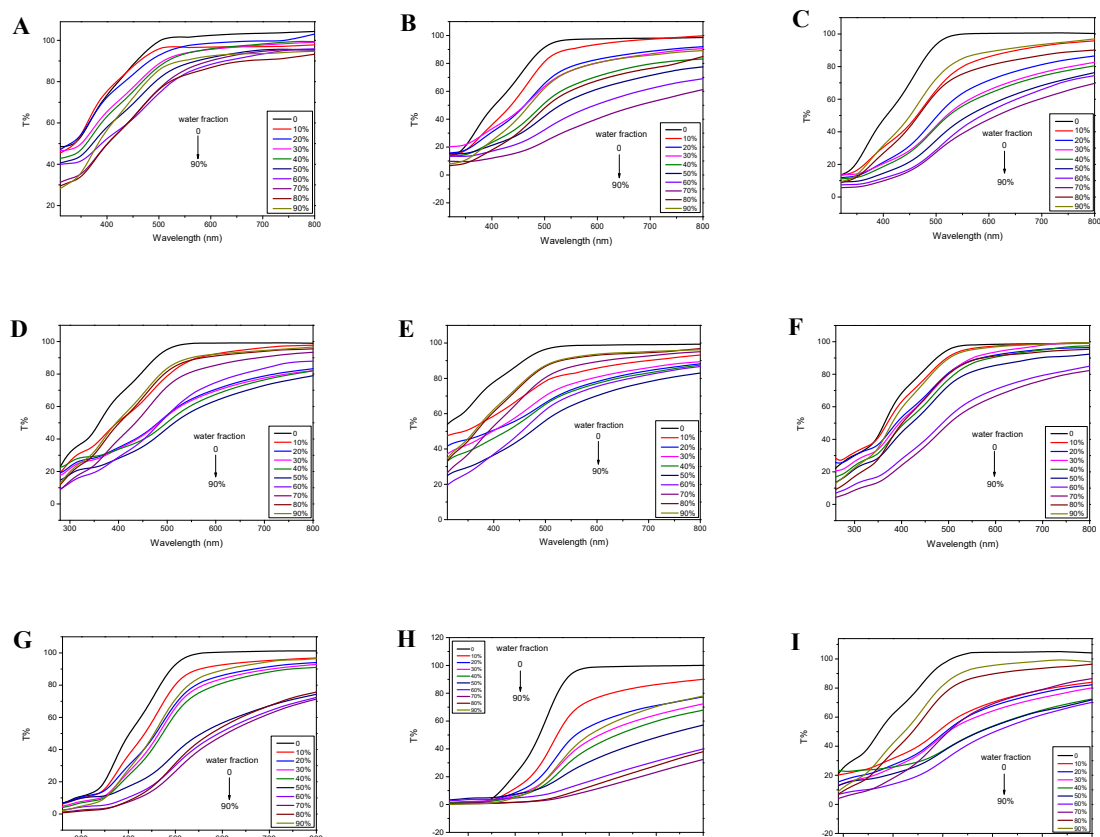

**Figure S79.** AIE nature characterization of (A) poly(D-IMCI-*co*-ITPB) (Table 2, entry 11), (B) poly(D-IMCI-*co*-ITPB) (Table 2, entry 12), (C) poly(D-IMCI-*co*-ITPB) (Table 2, entry 13), (D) poly(D-IMCI-*co*-ITPB) (Table 2, entry 14), (E) poly(D-IMCI-*co*-ITPB) (Table 2, entry 15), (F) poly(L-IMCI-*co*-ITPB) (Table 2, entry 16), (G) poly(L-IMCI-*co*-ITPB) (Table 2, entry 18), (H) poly(L-IMCI-*co*-ITPB) (Table 3, entry 19), (I) poly(L-IMCI-*co*-ITPB) (Table 3, entry 20) in THF/MeOH mixture. The UV/Vis transmittance spectra with the MeOH fraction in THF/MeOH mixture ranging from 0 to 90%.

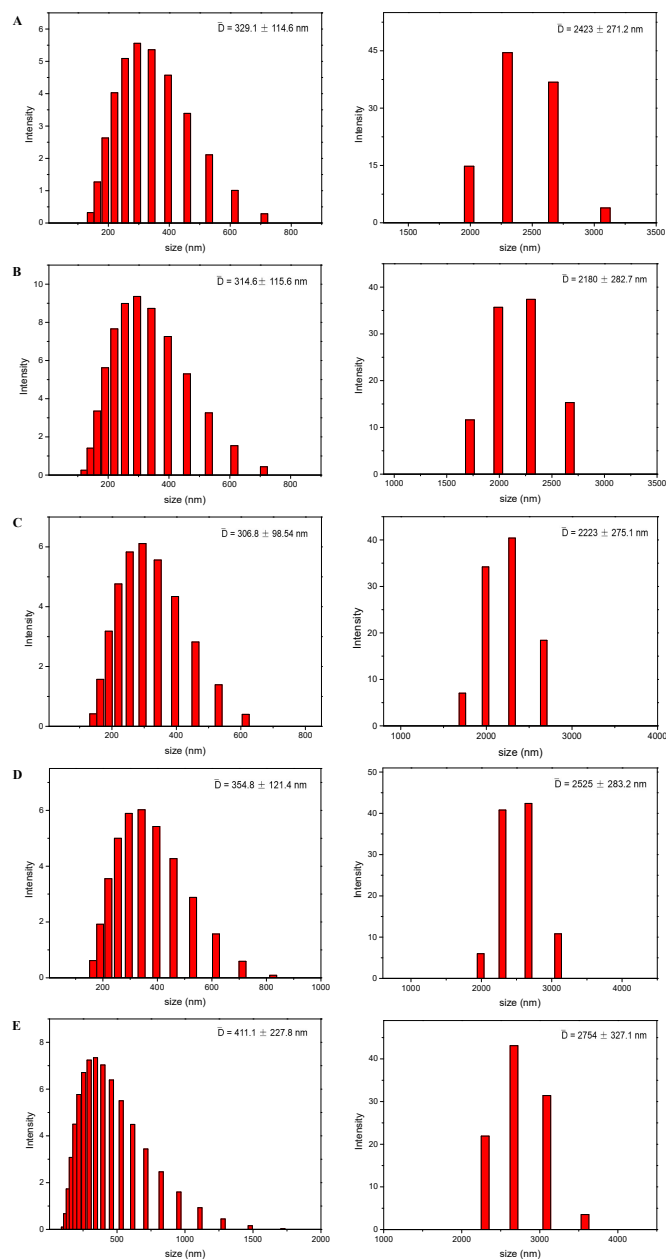

**Figure S80.** AIE nature characterization of poly(D-IMCI-*co*-ITPB)s in THF/MeOH mixture. (A) Dynamic light scattering measurement of poly(D-IMCI-*co*-ITPB) (Table 1, entry 11) at 0% MeOH fraction in THF-MeOH mixture (left side) and at 60% MeOH fraction in THF-MeOH mixture (right side). (B) Dynamic light scattering measurement of poly(D-IMCI-*co*-ITPB) (Table 1, entry 12) at 0% MeOH fraction in THF-MeOH mixture (left side) and at 60% MeOH fraction in THF-MeOH mixture (right side). (C) Dynamic light scattering measurement of poly(D-IMCI-*co*-ITPB) (Table 1, entry 13) at 0% MeOH fraction in THF-MeOH mixture (left side) and at 50% MeOH fraction in THF-MeOH mixture (right side). (D) Dynamic light scattering measurement of poly(D-IMCI-*co*-ITPB) (Table 1, entry 14) at 0% MeOH fraction in THF-MeOH mixture (left side) and at 60% MeOH fraction in THF-MeOH mixture (right side). (E) Dynamic light scattering measurement of poly(D-IMCI-*co*-ITPB) (Table 1, entry 15) at 0% MeOH fraction in THF-MeOH mixture (left side) and at 60% MeOH fraction in THF-MeOH mixture (right side).

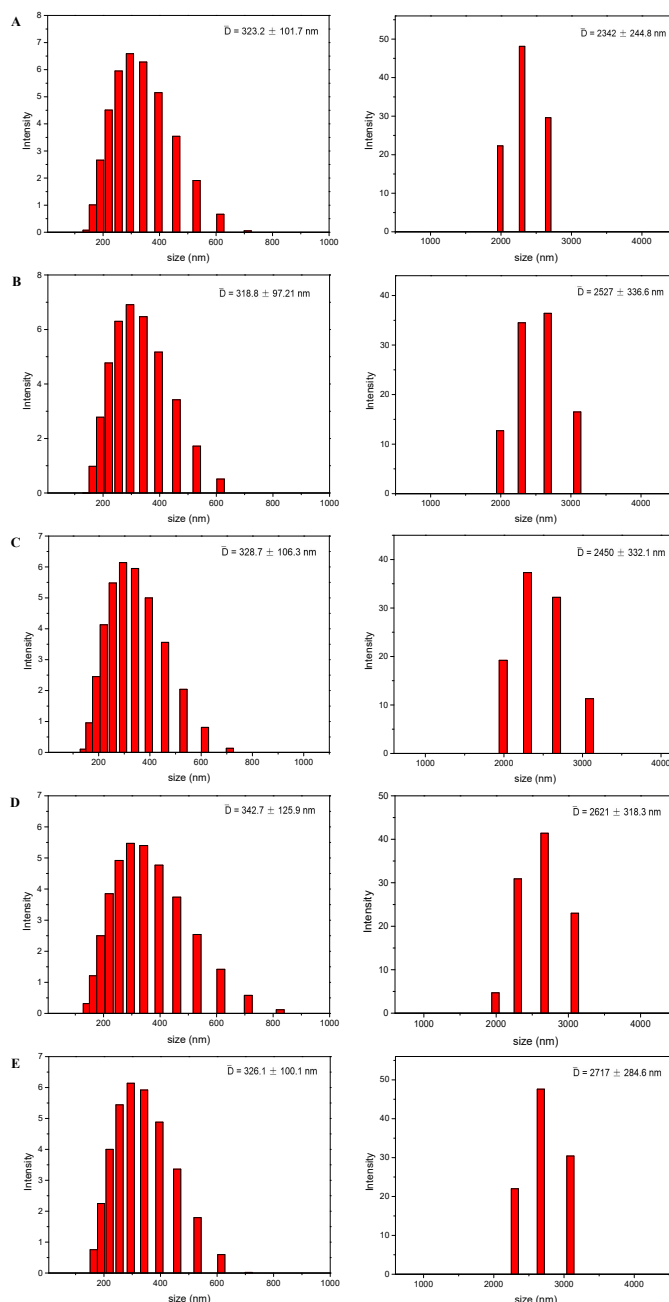

**Figure S81.** AIE nature characterization of poly(L-IMCI-*co*-ITPB)s in THF/MeOH mixture. (A) Dynamic light scattering measurement of poly(L-IMCI-*co*-ITPB) (Table 2, entry 16) at 0% MeOH fraction in THF-MeOH mixture (left side) and at 60% MeOH fraction in THF-MeOH mixture (right side). (B) Dynamic light scattering measurement of poly(L-IMCI-*co*-ITPB) (Table 2, entry 17) at 0% MeOH fraction in THF-MeOH mixture (left side) and at 60% MeOH fraction in THF-MeOH mixture (right side). (C) Dynamic light scattering measurement of poly(L-IMCI-*co*-ITPB) (Table 2, entry 18) at 0% MeOH fraction in THF-MeOH mixture (left side) and at 60% MeOH fraction in THF-MeOH mixture (right side). (D) Dynamic light scattering measurement of poly(L-IMCI-*co*-ITPB) (Table 2, entry 19) at 0% MeOH fraction in THF-MeOH mixture (left side) and at 60% MeOH fraction in THF-MeOH mixture (right side). (E) Dynamic light scattering measurement of poly(L-IMCI-*co*-ITPB) (Table 2, entry 20) at 0% MeOH fraction in THF-MeOH mixture (left side) and at 60% MeOH fraction in THF-MeOH mixture (right side).

## References

- (1) Gao, F.; Chen, J.; Cao, Q. Three Different Types of Asymmetric Polymerization of Aryl Isocyanides by Using Simple Rare-Earth Metal Trialkyl Precursors. *Macromolecules* **2022**, *55*(17), 7488-7497.
- (2) Wu, X.; Yan, X.; Yang, Z. Al<sup>t</sup>Bu<sub>3</sub>: Unprecedented Main-Group Metal Catalyst for Helical Sense-Selective Polymerization of Chiral Aryl Isocyanides and Copolymerization with Achiral Aryl Isocyanides. *Mater. Chem. Front.* **2019**, *3*(6), 1192-1198.
- (3) X. Yan.; S. Zhang.; P. Zhang.; X. F. Li.; [Ph<sub>3</sub>C][B(C<sub>6</sub>F<sub>5</sub>)<sub>4</sub>]: A Highly Efficient Metal-Free Single-Component Initiator for the Helical-Sense-Selective Cationic Copolymerization of Chiral Aryl Isocyanides and Achiral Aryl Isocyanides. *Angew. Chem. Int. Ed.* **2018**, *57*, 8947-8952.
